# Supplementary material for: Expression Profiles of tRNA-Derived Small RNAs and Their Potential Roles in Primary Nasopharyngeal Carcinoma
Source: Front Mol Biosci. 2021 Dec 20;8:780621. doi: 10.3389/fmolb.2021.780621 (PMC8722782; doi:10.3389/fmolb.2021.780621)
Supplement: Supplementary file 4 [file Table1.XLSX]

## Sheet: Test_vs_Control
#Gene biotype: tRFs #Condition pair: Test_vs_Control Column A: tRF_ID, The ID of tRF & tiRNA. Column B: tRF_Seq, The sequence of tRF & tiRNA. Column C: Type, The type of tRF & tiRNA. Column D: tRFdb_ID, The database ID of tRFdb. Column E: MINTbase_ID, The database ID of MINTbase. Column F: Length, The length of sequence. Column G: AlignInfo, Alignment information, format (tRNA_id,tRNA_Seq,aminoac…
Annotation							DE Statistic						CPM
tRF_ID	tRF_Seq	Type	tRFdb_ID	MINTbase_ID	Length	AlignInfo	log2FC	Fold_Change	p_value	q_value	Test_CPM	Control_CPM	N1	N2	N3	N4	T1	T2	T3	T4
tRF-+1:T32-Ala-AGC-8-2	GTTTTCCTTCCTGTCCCGTACGGTTTTTCTTT	tRF-1	-	-	32	pre_tRNA-Ala-AGC-8-2,CCTTCTCTAAAGGAACAGATAATAAGCCGTGCCCAGCCGTGGGGGATTAGCTCAAATGGTAGAGCGCTCGCTTAGCATGCGAGAGGTAGCGGGATCGATGCCCGCATCCTCCAGTTTTCCTTCCTGTCCCGTACGGTTTTTCTTTCGATTCTC,Ala-AGC,113	-5.66733	0.0196772	0.0027425	0.021623	-3.72768	1.93965	3.94983	24.232	0	1.5568	0	0	0	0
tRF-30:43-Gln-CTG-1-M6	GACTCTGAATCCAG	tRF-2	-	-	14	tRNA-Gln-CTG-1-1,GGTTCCATGGTGTAATGGTTAGCACTCTGGACTCTGAATCCAGCGATCCGAGTTCAAATCTCGGTGGAACCTCCA,Gln-CTG,29;tRNA-Gln-CTG-2-1,GGTTCCATGGTGTAATGGTTAGCACTCTGGACTCTGAATCCAGCGATCCGAGTTCAAGTCTCGGTGGAACCTCCA,Gln-CTG,29;tRNA-Gln-CTG-3-1,GGTTCCATGGTGTAATGGTGAGCACTCTGGACTCTGAATCCAGCGATCCGAGTTCGAGTCTCGGTGGAACCTCCA,Gln-CTG,29;tRNA-Gln-CTG-4-1,GGTTCCATGGTGTAATGGTAAGCACTCTGGACTCTGAATCCAGCGATCCGAGTTCGAGTCTCGGTGGAAC…	-4.53559	0.0431172	3.07914e-05	0.000710407	-0.620304	3.91529	22.3824	26.9245	29.7031	11.676	0.304709	0.589244	0.204904	0.597912
tRF-57:74-chrM.Phe-GAA	ATCACCCCATAAACACCA	tRF-3a	-	tRF-18-H5KQBFD2	18	chrM.tRNA1-PheGAA,GTTTATGTAGCTTACCTCCTCAAAGCAATACACTGAAAATGTTTAGACGGGCTCACATCACCCCATAAACACCA,Phe-GAA,56	-4.30262	0.0506738	0.00047173	0.00589354	-0.47014	3.83248	61.8807	35.0018	21.8865	0	0.304709	0	0.204904	1.79374
tRF-55:76-Arg-ACG-1-M2	TCGACTCCTGGCTGGCTCGCCA	tRF-3b	-	tRF-22-WD8YQ84V2	22	tRNA-Arg-ACG-1-1,GGGCCAGTGGCGCAATGGATAACGCGTCTGACTACGGATCAGAAGATTCCAGGTTCGACTCCTGGCTGGCTCGCCA,Arg-ACG,54;tRNA-Arg-ACG-2-1,GGGCCAGTGGCGCAATGGATAACGCGTCTGACTACGGATCAGAAGATTCTAGGTTCGACTCCTGGCTGGCTCGCCA,Arg-ACG,54	-4.01478	0.0618631	0.000369411	0.00477068	-0.430885	3.58389	17.1159	29.6169	26.5765	5.4488	0.609418	0	0.409808	0.597912
tRF-56:75-Gln-CTG-1-M2	AAATCTCGGTGGAACCTCCA	tRF-3b	-	tRF-20-BMW36D46	20	tRNA-Gln-CTG-1-1,GGTTCCATGGTGTAATGGTTAGCACTCTGGACTCTGAATCCAGCGATCCGAGTTCAAATCTCGGTGGAACCTCCA,Gln-CTG,55;tRNA-Gln-CTG-5-1,GGTTCCATGGTGTAATGGTTAGCACTCTGGACTCTGAATCCGGTAATCCGAGTTCAAATCTCGGTGGAACCTCCA,Gln-CTG,55	-3.89712	0.0671196	0.00204436	0.0177702	-0.986155	2.91097	0	13.4622	20.3232	6.2272	0	0.589244	0	1.19582
tRF-+1:T14-Gly-TCC-1	TGCGGTACCACTTT	tRF-1	-	-	14	pre_tRNA-Gly-TCC-1-1,CCACTATTAAGGATATCCGGAGAGGATGCTACCTATCAGGGCGTTGGTGGTATAGTGGTTAGCATAGCTGCCTTCCAAGCAGTTGACCCGGGTTCGATTCCCGGCCAACGCATGCGGTACCACTTTTGCGAGTTTGAAATTTTCATTTTAGT,Gly-TCC,112	-3.79656	0.071965	0.00050897	0.00589354	5.45054	9.2471	325.203	1260.07	2173.02	100.414	2.13296	12.9634	3.07356	175.188
tRF-+1:T33-Gln-CTG-3	TTCTGTTTAATTAGGACGGCAATGTTGTGTTTT	tRF-1	-	-	33	pre_tRNA-Gln-CTG-3-1,TATTGGGAATTCAGACGCTTCCGGCAAACTTGCACGATGAGGTTCCATGGTGTAATGGTGAGCACTCTGGACTCTGAATCCAGCGATCCGAGTTCGAGTCTCGGTGGAACCTTTCTGTTTAATTAGGACGGCAATGTTGTGTTTTACTCCCT,Gln-CTG,112	-3.53914	0.0860224	0.00637219	0.0384031	-0.256965	3.28218	2.63322	13.4622	32.8297	5.4488	0	0	1.02452	0
tRF-+1:T15-Gly-TCC-1	TGCGGTACCACTTTT	tRF-1	1041	-	15	pre_tRNA-Gly-TCC-1-1,CCACTATTAAGGATATCCGGAGAGGATGCTACCTATCAGGGCGTTGGTGGTATAGTGGTTAGCATAGCTGCCTTCCAAGCAGTTGACCCGGGTTCGATTCCCGGCCAACGCATGCGGTACCACTTTTGCGAGTTTGAAATTTTCATTTTAGT,Gly-TCC,112	-3.35728	0.0975791	0.00218571	0.0186404	3.31624	6.67353	46.0814	226.166	362.69	15.568	0.609418	2.6516	0.614713	40.0601
tRF-+1:T16-Gln-CTG-1-3	TTCATTTCTCTCCTTT	tRF-1	-	-	16	pre_tRNA-Gln-CTG-1-3,AGACCCCAGGTGGATCGAGTATCCATTTTTTGTTAAGTAGGGTTCCATGGTGTAATGGTTAGCACTCTGGACTCTGAATCCAGCGATCCGAGTTCAAATCTCGGTGGAACCTTTCATTTCTCTCCTTTTGCCTTGTTTCCGATAACCTTGAG,Gln-CTG,112	-3.34895	0.0981444	0.00277463	0.021623	-0.232604	3.11635	9.21627	13.4622	28.1398	3.1136	0.609418	0	0.204904	1.79374
tRF-+1:T32-Gly-CCC-1-2	AAAGGGTCTTTTTCACCCCGCTGTTGCTCTTT	tRF-1	-	-	32	pre_tRNA-Gly-CCC-1-2,TACTCTTTTCTGTTATCCTCCAGGCGGTAGTTACGCAGAGGCATTGGTGGTTCAGTGGTAGAATTCTCGCCTCCCACGCGGGAGACCCGGGTTCAATTCCCGGCCAATGCAAAAGGGTCTTTTTCACCCCGCTGTTGCTCTTTATCTGTCT,Gly-CCC,111	-3.24844	0.105226	0.0339359	0.111964	-1.26653	1.98191	36.8651	0	0	0	0.304709	0.294622	0	0.597912
tRF-+1:T17-Val-CAC-1	AAGTGGTTCCCGTTTTT	tRF-1	-	-	17	pre_tRNA-Val-CAC-1-1,GACTTTTCAGAGTCATTTGTGGAAAACCTGCCACCGCCTGGTTTCCGTAGTGTAGTGGTTATCACGTTCGCCTCACACGCGAAAGGTCCCCGGTTCGAAACCGGGCGGAAACAAAGTGGTTCCCGTTTTTGTTTTTTTCCTTCCCCATATCCT,Val-CAC,113	-3.11495	0.115426	0.00155777	0.0143916	1.78737	4.90232	53.981	118.468	50.0263	3.892	2.43767	0.589244	0.204904	9.56659
tRF-53:69-chrM.Thr-TGT	TTTTTCCAAGGACACCA	tRF-3a	-	tRF-17-ZZK0O52	17	chrM.tRNA14-ThrTGT,GTCCTTGTAGTATAAACTAATACACCAGTCTTGTAAACCGGAGACGAAAACCTTTTTCCAAGGACACCA,Thr-TGT,52	-3.09701	0.116871	0.00697687	0.041494	-0.19289	2.90412	27.6488	8.07735	14.0699	3.1136	0.609418	0	0.409808	1.19582
tRF-+1:T32-Gln-CTG-3	TTCTGTTTAATTAGGACGGCAATGTTGTGTTT	tRF-1	-	-	32	pre_tRNA-Gln-CTG-3-1,TATTGGGAATTCAGACGCTTCCGGCAAACTTGCACGATGAGGTTCCATGGTGTAATGGTGAGCACTCTGGACTCTGAATCCAGCGATCCGAGTTCGAGTCTCGGTGGAACCTTTCTGTTTAATTAGGACGGCAATGTTGTGTTTTACTCCCT,Gln-CTG,112	-3.06346	0.119621	0.021525	0.0884481	0.873487	3.93695	0	13.4622	65.6595	5.4488	0.609418	0	1.84414	0
tRF-+1:T28-His-GTG-1-3	ATGTCGTTAGTCTAGGCTGTCAGCTCTT	tRF-1	-	-	28	pre_tRNA-His-GTG-1-3,GCTAGAGCAAGCTCCGCCATCGCGGCTTAGCCTGTGGCTCGCCGTGATCGTATAGTGGTTAGTACTCTGCGTTGTGGCCGCAGCAACCTCGGTTCGAATCCGAGTCACGGCAATGTCGTTAGTCTAGGCTGTCAGCTCTTCCCTTTTGCTCC,His-GTG,112	-3.04173	0.121436	0.0077082	0.0435869	-0.509663	2.53207	6.58305	24.232	7.8166	2.3352	0.914126	0	0	1.19582
tRF-+1:T15-Arg-CCT-4	GCCTGTGACTTTTGT	tRF-1	-	-	15	pre_tRNA-Arg-CCT-4-1,AAATAGTTGAATATGTTGTGTGAGCGCGTCGTTTGCAGAAGCCCCAGTGGCCTAATGGATAAGGCATTGGCCTCCTAAGCCAGGGATTGTGGGTTCGAGTCCCATCTGGGGTGGCCTGTGACTTTTGTCCTTTTTTCCCCTTTCTAAACAAAG,Arg-CCT,113	-2.91612	0.132483	0.00712256	0.0418104	0.0452739	2.96139	27.6488	13.4622	17.1965	0.7784	0.914126	0.589244	0.204904	1.19582
tRF-1:31-chrM.Pro-TGG	CAGAGAATAGTTTAAATTAGAATCTTAGCTT	tRF-5c	-	-	31	chrM.tRNA15-ProTGG,CAGAGAATAGTTTAAATTAGAATCTTAGCTTTGGGTGCTAATGGTGGAGTTAAAGACTTTTTCTCTGACCA,Pro-TGG,0	-2.90115	0.133865	0.0354344	0.114996	-0.749599	2.15155	2.63322	0	21.8865	0.7784	0.609418	0.883866	0	0
tRF-57:75-Gln-CTG-1-M2	AATCTCGGTGGAACCTCCA	tRF-3b	-	tRF-19-D7M4O1J2	19	tRNA-Gln-CTG-1-1,GGTTCCATGGTGTAATGGTTAGCACTCTGGACTCTGAATCCAGCGATCCGAGTTCAAATCTCGGTGGAACCTCCA,Gln-CTG,56;tRNA-Gln-CTG-5-1,GGTTCCATGGTGTAATGGTTAGCACTCTGGACTCTGAATCCGGTAATCCGAGTTCAAATCTCGGTGGAACCTCCA,Gln-CTG,56	-2.89111	0.1348	0.00379853	0.0264144	0.80723	3.69834	10.5329	21.5396	28.1398	11.676	0.914126	1.47311	0	4.18538
tRF-61:77-Ile-AAT-1-M5	CCCCGTACGGGCCACCA	tRF-3a	-	tRF-17-KSU8P52	17	tRNA-Ile-AAT-1-1,GGCCGGTTAGCTCAGTTGGTTAGAGCGTGGCGCTAATAACGCCAAGGTCGCGGGTTCGATCCCCGTACGGGCCACCA,Ile-AAT,60;tRNA-Ile-AAT-4-1,GGCCGGTTAGCTCAGTTGGTTAGAGCGTGGTGCTAATAACGCCAAGGTCGCGGGTTCGAACCCCGTACGGGCCACCA,Ile-AAT,60;tRNA-Ile-AAT-5-1,GGCCGGTTAGCTCAGTTGGTTAGAGCGTGGTGCTAATAACGCCAAGGTCGCGGGTTCGATCCCCGTACGGGCCACCA,Ile-AAT,60;tRNA-Ile-AAT-7-1,GGCCGGTTAGCTCAGTTGGTCAGAGCGTGGTGCTAATAACGCCAAGGTCGCGGGTTCGATCCCC…	-2.83493	0.140152	0.0223718	0.089615	-0.624658	2.21027	1.31661	21.5396	6.25328	2.3352	0.304709	1.47311	0	0
tRF-+1:T17-Arg-CCG-1-3	TTGCCATGTTAACGTTT	tRF-1	-	-	17	pre_tRNA-Arg-CCG-1-3,GAAAGCTTTATGAGAATAGCTGGGAGCCATACAGCCGCAGGGCCGCGTGGCCTAATGGATAAGGCGTCTGATTCCGGATCAGAAGATTGAGGGTTCGAGTCCCTTCGTGGTCGTTGCCATGTTAACGTTTTCTTCCAGCTCCACTTAAAATTT,Arg-CCG,113	-2.73058	0.150666	0.00493846	0.0325446	2.57283	5.30341	78.9966	75.3886	101.616	12.4544	1.82825	0.294622	1.02452	19.7311
tiRNA-32:71-chrM.His-GTG-M1-39:C>A	TGAATCTGACAACAGAGGCTTACGACCCCTTATTTACCCA	tiRNA-3	-	-	40	chrM.tRNA11-HisGTG,GTAAATATAGTTTAACCAAAACATCAGATTGTGAATCTGACAACAGAGGCTTACGACCCCTTATTTACCCCA,His-GTG,31	-2.65524	0.158743	0.00531088	0.0342931	2.15062	4.80586	47.398	91.5433	57.8429	5.4488	3.3518	2.94622	2.45885	0.597912
tRF-+1:T14-Asn-GTT-2-4	GTCAGTGCTTCTTT	tRF-1	-	-	14	pre_tRNA-Asn-GTT-2-4,CGGAAATCTGTACACACCGCAGCGCGGCCTGAGTAACTGGGTCTCTGTGGCGCAATCGGTTAGCGCGTTCGGCTGTTAACCGAAAGGTTGGTGGTTCGAGCCCACCCAGGGACGGTCAGTGCTTCTTTTCCCGAGACAACATTTACCCGATGGT,Asn-GTT,114	-2.6446	0.159918	0.00457218	0.0308451	3.46518	6.10978	56.6143	129.238	215.738	25.6872	8.83655	5.3032	1.22943	22.7207
tRF-+1:T16-Val-CAC-1	AAGTGGTTCCCGTTTT	tRF-1	-	-	16	pre_tRNA-Val-CAC-1-1,GACTTTTCAGAGTCATTTGTGGAAAACCTGCCACCGCCTGGTTTCCGTAGTGTAGTGGTTATCACGTTCGCCTCACACGCGAAAGGTCCCCGGTTCGAAACCGGGCGGAAACAAAGTGGTTCCCGTTTTTGTTTTTTTCCTTCCCCATATCCT,Val-CAC,113	-2.63369	0.161131	0.00784647	0.0435869	4.55953	7.19322	154.043	177.702	564.359	26.4656	7.61772	5.3032	1.63923	83.1098
tRF-59:75-His-GTG-1-M2	TCCGAGTCACGGCACCA	tRF-3a	3013a	tRF-17-8US5652	17	tRNA-His-GTG-1-1,GCCGTGATCGTATAGTGGTTAGTACTCTGCGTTGTGGCCGCAGCAACCTCGGTTCGAATCCGAGTCACGGCACCA,His-GTG,58;tRNA-His-GTG-2-1,GCCATGATCGTATAGTGGTTAGTACTCTGCGCTGTGGCCGCAGCAACCTCGGTTCGAATCCGAGTCACGGCACCA,His-GTG,58	-2.61015	0.163782	0.0209693	0.0869554	-0.00459188	2.60556	17.1159	26.9245	4.68996	0.7784	0.304709	1.76773	0.204904	0.597912
tRF-52:72-chrM.Val-TAC	TTAACTTGACCGCTCTGACCA	tRF-3b	-	tRF-21-YDZDL9X1B	21	chrM.tRNA2-ValTAC,CAGAGTGTAGCTTAACACAAAGCACCCAACTTACACTTAGGAGATTTCAACTTAACTTGACCGCTCTGACCA,Val-TAC,51	-2.59365	0.165666	0.018488	0.0802845	-0.00640915	2.58724	21.0658	10.7698	10.9432	1.5568	0	1.76773	0.204904	1.19582
tRF-+1:T15-Val-CAC-1	AAGTGGTTCCCGTTT	tRF-1	-	-	15	pre_tRNA-Val-CAC-1-1,GACTTTTCAGAGTCATTTGTGGAAAACCTGCCACCGCCTGGTTTCCGTAGTGTAGTGGTTATCACGTTCGCCTCACACGCGAAAGGTCCCCGGTTCGAAACCGGGCGGAAACAAAGTGGTTCCCGTTTTTGTTTTTTTCCTTCCCCATATCCT,Val-CAC,113	-2.58651	0.166487	0.0634759	0.165844	4.87865	7.46517	34.2319	32.3094	902.036	25.6872	10.9695	1.47311	0.409808	113.603
tRF-+1:T14-Val-CAC-1-M1-10:C>T	AAGTGGTTCCTGTT	tRF-1	-	-	14	pre_tRNA-Val-CAC-1-1,GACTTTTCAGAGTCATTTGTGGAAAACCTGCCACCGCCTGGTTTCCGTAGTGTAGTGGTTATCACGTTCGCCTCACACGCGAAAGGTCCCCGGTTCGAAACCGGGCGGAAACAAAGTGGTTCCCGTTTTTGTTTTTTTCCTTCCCCATATCCT,Val-CAC,113	-2.55266	0.170441	0.125993	0.267365	2.21452	4.76718	2.63322	0	143.826	3.892	2.13296	0	0	17.3394
tRF-1:32-chrM.Ser-GCT	GAGAAAGCTCACAAGAACTGCTAACTCATGCC	tRF-5c	-	tRF-32-5BF900BY4D84J	32	chrM.tRNA12-SerGCT,GAGAAAGCTCACAAGAACTGCTAACTCATGCCCCCATGTCTAACAACATGGCTTTCTCACCA,Ser-GCT,0	-2.51735	0.174664	0.00439985	0.0301323	2.1741	4.69145	34.2319	48.4641	60.9695	15.568	1.52354	3.53546	1.63923	7.17494
tRF-+1:T17-Ser-GCT-4-2	ATGTGGTGGCTTACTTT	tRF-1	1005	-	17	pre_tRNA-Ser-GCT-4-2,TATTACTCCCTATAGCAATCAGGAAACAGTAACTTACCGGGACGAGGTGGCCGAGTGGTTAAGGCGATGGACTGCTAATCCATTGTGCTCTGCACGCGTGGGTTCGAATCCCATCCTCGTCGATGTGGTGGCTTACTTTTGCTTGTAACCAAAGTAAATTTG,Ser-GCT,122	-2.50939	0.17563	0.00496809	0.0325446	5.29711	7.8065	367.334	613.879	451.8	89.516	41.7451	9.42791	5.12261	68.7599
tiRNA-32:70-chrM.His-GTG-M1-38:C>A	TGAATCTGACAACAGAGGCTTACGACCCCTTATTTACCA	tiRNA-3	-	-	39	chrM.tRNA11-HisGTG,GTAAATATAGTTTAACCAAAACATCAGATTGTGAATCTGACAACAGAGGCTTACGACCCCTTATTTACCCCA,His-GTG,31	-2.4785	0.179431	0.0176627	0.0794651	0.998416	3.47692	10.5329	21.5396	37.5197	2.3352	0.609418	1.47311	1.43433	0.597912
tRF-58:75-Gln-CTG-2-M3	GTCTCGGTGGAACCTCCA	tRF-3a	-	tRF-18-S9R8B7D2	18	tRNA-Gln-CTG-2-1,GGTTCCATGGTGTAATGGTTAGCACTCTGGACTCTGAATCCAGCGATCCGAGTTCAAGTCTCGGTGGAACCTCCA,Gln-CTG,57;tRNA-Gln-CTG-3-1,GGTTCCATGGTGTAATGGTGAGCACTCTGGACTCTGAATCCAGCGATCCGAGTTCGAGTCTCGGTGGAACCTCCA,Gln-CTG,57;tRNA-Gln-CTG-4-1,GGTTCCATGGTGTAATGGTAAGCACTCTGGACTCTGAATCCAGCGATCCGAGTTCGAGTCTCGGTGGAACCTCCA,Gln-CTG,57	-2.4756	0.179792	0.0254798	0.0940834	0.414437	2.89003	2.63322	21.5396	6.25328	9.3408	0.609418	1.76773	0	2.39165
tRF-+1:T20-Asp-GTC-2-10	GCCGGGTACTTTCGTATTTT	tRF-1	-	-	20	pre_tRNA-Asp-GTC-2-10,GGACATAAGAAGGGAGCTGCAGGGAACACAGTACGGCTTGTCCTCGTTAGTATAGTGGTGAGTATCCCCGCCTGTCACGCGGGAGACCGGGGTTCGATTCCCCGACGGGGAGGCCGGGTACTTTCGTATTTTTAAATACAGAGGGGAGACTT,Asp-GTC,112	-2.41418	0.187611	0.0316766	0.106849	0.774158	3.18834	10.5329	10.7698	25.0131	6.2272	3.65651	0.294622	0	0
tRF-+1:T14-Gln-TTG-3-3	TCTTGGCTCTTTTT	tRF-1	-	-	14	pre_tRNA-Gln-TTG-3-3,TATTTGTCAGAAGAAAAACTTCATAAGCAGGCTTATAGGTGGCCCCATGGTGTAATGGTTAGCACTCTGGACTTTGAATCCAGCGATCCGAGTTCAAATCTCGGTGGGACCTTCTTGGCTCTTTTTTTTTTTTTTTTCCCACTTCTGCCAGT,Gln-TTG,112	-2.41159	0.187948	0.0151096	0.0726549	1.07439	3.48599	14.4827	32.3094	23.4498	4.6704	2.43767	0.883866	0	3.58747
tRF-+1:T18-Thr-TGT-4	CGGCTGTAGGAATACTTT	tRF-1	-	-	18	pre_tRNA-Thr-TGT-4-1,TGCATAATAGATTGATTGTTAAATGTTTGCTCTCTGTGGCGGCTCCATAGCTCAGGGGTTAGAGCACTGGTCTTGTAAACCAGGGGTCGCGAGTTCAAATCTCGCTGGGGCCTCGGCTGTAGGAATACTTTTCCCAAGCAAAAGAGCAGGAGC,Thr-TGT,113	-2.39644	0.189933	0.0118245	0.0621475	2.16325	4.55969	82.9465	16.1547	56.2795	9.3408	1.82825	1.17849	0.204904	14.9478
tRF-+1:T22-Leu-TAG-3	CACCTCAGAAGGTCTCACTTTT	tRF-1	-	-	22	pre_tRNA-Leu-TAG-3-1,TCACACTAATATGCCGGCATAGGAAGCCCTACGATCGGGAGGTAGCGTGGCCGAGTGGTCTAAGGCGCTGGATTTAGGCTCCAGTCATTTCGATGGCGTGGGTTCGAATCCCACCGCTGCCACACCTCAGAAGGTCTCACTTTTCTATCCATAAACCATCTC,Leu-TAG,122	-2.38116	0.191954	0.0177566	0.0794651	1.4266	3.80777	13.1661	35.0018	26.5765	10.1192	4.26592	0	0.204904	2.98956
tRF-56:72-chrM.Val-TAC	CTTGACCGCTCTGACCA	tRF-3a	-	tRF-17-NU3IND2	17	chrM.tRNA2-ValTAC,CAGAGTGTAGCTTAACACAAAGCACCCAACTTACACTTAGGAGATTTCAACTTAACTTGACCGCTCTGACCA,Val-TAC,55	-2.34685	0.196575	0.0186502	0.0802845	2.4678	4.81465	218.557	16.1547	15.6332	5.4488	0.609418	3.83009	0.819617	16.7415
tRF-+1:T15-Asn-GTT-2-4	GTCAGTGCTTCTTTT	tRF-1	-	-	15	pre_tRNA-Asn-GTT-2-4,CGGAAATCTGTACACACCGCAGCGCGGCCTGAGTAACTGGGTCTCTGTGGCGCAATCGGTTAGCGCGTTCGGCTGTTAACCGAAAGGTTGGTGGTTCGAGCCCACCCAGGGACGGTCAGTGCTTCTTTTCCCGAGACAACATTTACCCGATGGT,Asn-GTT,114	-2.34181	0.197263	0.0129986	0.0660153	2.97162	5.31343	42.1315	72.6961	121.939	14.0112	10.9695	1.17849	1.02452	8.96868
tRF-58:75-Trp-CCA-2	GTCACGTCGGGGTCACCA	tRF-3a	-	tRF-18-S5S8R6D2	18	tRNA-Trp-CCA-2-1,GACCTCGTGGCGCAATGGTAGCGCGTCTGACTCCAGATCAGAAGGTTGCGTGTTCAAGTCACGTCGGGGTCACCA,Trp-CCA,57	-2.31771	0.200585	0.0160124	0.0755416	1.34118	3.65889	23.699	48.4641	20.3232	2.3352	0.609418	4.12471	0.409808	3.58747
tRF-+1:T18-Ile-AAT-2	AGTATTCTCTGTGGCTTT	tRF-1	-	-	18	pre_tRNA-Ile-AAT-2-1,ATAGTAGCTTATAATGTGGAAGTAAGGCATCCTGTCATCCGGCCGGTTAGCTCAGTTGGTTAGAGCGTGGTGCTAATAACGCCAAGGTCGCGGGTTCGATCCCCGTACTGGCCAAGTATTCTCTGTGGCTTTTATCACCAGAATGGATAGTAAC,Ile-AAT,114	-2.29713	0.203467	0.031025	0.106237	0.928208	3.22534	22.3824	26.9245	21.8865	0	0.609418	1.47311	0.204904	4.7833
tRF-+1:T19-Thr-TGT-4	CGGCTGTAGGAATACTTTT	tRF-1	-	-	19	pre_tRNA-Thr-TGT-4-1,TGCATAATAGATTGATTGTTAAATGTTTGCTCTCTGTGGCGGCTCCATAGCTCAGGGGTTAGAGCACTGGTCTTGTAAACCAGGGGTCGCGAGTTCAAATCTCGCTGGGGCCTCGGCTGTAGGAATACTTTTCCCAAGCAAAAGAGCAGGAGC,Thr-TGT,113	-2.28814	0.20474	0.0225548	0.089615	1.47103	3.75917	60.5641	10.7698	26.5765	3.892	1.82825	0	0.819617	5.97912
tRF-54:75-His-GTG-1-M2	TCGAATCCGAGTCACGGCACCA	tRF-3b	3013b	tRF-22-WB8US5652	22	tRNA-His-GTG-1-1,GCCGTGATCGTATAGTGGTTAGTACTCTGCGTTGTGGCCGCAGCAACCTCGGTTCGAATCCGAGTCACGGCACCA,His-GTG,53;tRNA-His-GTG-2-1,GCCATGATCGTATAGTGGTTAGTACTCTGCGCTGTGGCCGCAGCAACCTCGGTTCGAATCCGAGTCACGGCACCA,His-GTG,53	-2.28145	0.205691	0.0231213	0.0900932	1.19438	3.47583	6.58305	40.3867	17.1965	7.0056	0.304709	2.35698	1.02452	2.98956
tRF-+1:T21-Leu-TAG-3	CACCTCAGAAGGTCTCACTTT	tRF-1	-	-	21	pre_tRNA-Leu-TAG-3-1,TCACACTAATATGCCGGCATAGGAAGCCCTACGATCGGGAGGTAGCGTGGCCGAGTGGTCTAAGGCGCTGGATTTAGGCTCCAGTCATTTCGATGGCGTGGGTTCGAATCCCACCGCTGCCACACCTCAGAAGGTCTCACTTTTCTATCCATAAACCATCTC,Leu-TAG,122	-2.27398	0.206758	0.0181838	0.0800395	1.49496	3.76895	14.4827	24.232	34.3931	8.5624	3.3518	1.47311	0.204904	3.58747
tRF-+1:T14-Pro-TGG-3-2	TCGTGGCTACTGTT	tRF-1	-	-	14	pre_tRNA-Pro-TGG-3-2,GAGAAATTCAGAGTGATAGGAAGCACCACTCAGCTACAGTGGCTCGTTGGTCTAGGGGTATGATTCTCGCTTTGGGTGCGAGAGGTCCCGGGTTCAAATCCCGGACGAGCCCTCGTGGCTACTGTTTTTCCACCCCCTTTTGTCAACTACTG,Pro-TGG,112	-2.27008	0.207319	0.0175633	0.0794651	3.22392	5.494	63.1973	8.07735	156.332	27.244	7.61772	2.6516	2.25395	16.1436
tRF-+1:T15-Leu-AAG-2	GTTTGTGGTAGTTTT	tRF-1	-	-	15	pre_tRNA-Leu-AAG-2-1,CATAACTGAAGGAAAATATGTAAATACCCAGCGGCAAAGAGGTAGCGTGGCCGAGCGGTCTAAGGCGCTGGATTAAGGCTCCAGTCTCTTCGGGGGCGTGGGTTCGAATCCCACCGCTGCCAGTTTGTGGTAGTTTTGTCACTTTTGTCCCCTATGGGTTAC,Leu-AAG,122	-2.26497	0.208054	0.0585657	0.159468	0.751215	3.01619	22.3824	0	32.8297	0	2.13296	0.589244	0.204904	1.79374
tRF-53:71-chrM.Pro-TGG	AAGACTTTTTCTCTGACCA	tRF-3b	-	tRF-19-DDZZ4YE2	19	chrM.tRNA15-ProTGG,CAGAGAATAGTTTAAATTAGAATCTTAGCTTTGGGTGCTAATGGTGGAGTTAAAGACTTTTTCTCTGACCA,Pro-TGG,52	-2.22921	0.213275	0.0190425	0.0812002	1.99097	4.22019	61.8807	21.5396	32.8297	10.8976	0	2.35698	2.45885	5.97912
tRF-54:75-iMet-CAT-1	TCGAAACCATCCTCTGCTACCA	tRF-3b	-	tRF-22-WB0Q37Q52	22	tRNA-iMet-CAT-1-1,AGCAGAGTGGCGCAGCGGAAGCGTGCTGGGCCCATAACCCAGAGGTCGATGGATCGAAACCATCCTCTGCTACCA,iMet-CAT,53	-2.21551	0.21531	0.0287323	0.101461	1.02932	3.24483	15.7993	18.8471	20.3232	5.4488	0.914126	1.17849	0	5.97912
tRF-+1:T28-Ser-GCT-6	CTCGGCTTTCCCTGCTAACTGGGCTTTT	tRF-1	-	-	28	pre_tRNA-Ser-GCT-6-1,CCAAATGAAACTGTTGAGAAGAGAAACATTACACATATCAGGAGAGGCCTGGCCGAGTGGTTAAGGCGATGGACTGCTAATCCATTGTGCTCTGCACGCGTGGGTTCGAATCCCATCCTCGTCGCTCGGCTTTCCCTGCTAACTGGGCTTTTTTAAAGGTTTCC,Ser-GCT,124	-2.1984	0.217878	0.116421	0.255205	0.217223	2.41563	0	0	21.8865	3.892	0	0.589244	1.02452	0.597912
tRF-1:30-chrM.Lys-TTT	CACTGTAAAGCTAACTTAGCATTAACCTTT	tRF-5c	-	tRF-30-2YU04DYJIO3Z	30	chrM.tRNA8-LysTTT,CACTGTAAAGCTAACTTAGCATTAACCTTTTAAGTTAAAGATTAAGAGAACCAACACCTCTTTACAGTGACCA,Lys-TTT,0	-2.19036	0.219097	0.0508448	0.14454	1.22138	3.41174	5.26644	8.07735	20.3232	14.7896	1.21884	0	1.84414	1.19582
tRF-+1:T17-Thr-TGT-2	CCTGTTGGCTTACTTTT	tRF-1	-	-	17	pre_tRNA-Thr-TGT-2-1,TGGTAAGATCTGTGAATTCCTGAAAACAACGCCTCACGTGGGCTCCATAGCTCAGTGGTTAGAGCACTGGTCTTGTAAACCAGGGGTCGCGAGTTCGATCCTCGCTGGGGCCTCCTGTTGGCTTACTTTTATTTTAATCCATAGCATTTAAAT,Thr-TGT,113	-2.1888	0.219334	0.0161762	0.0755416	2.91967	5.10846	60.5641	56.5414	104.742	8.5624	3.3518	2.06235	2.66375	15.5457
tRF-57:75-Pro-AGG-1-M7	AATCCCGGACGAGCCCCCA	tRF-3b	-	tRF-19-DRMD5112	19	tRNA-Pro-AGG-1-1,GGCTCGTTGGTCTAGGGGTATGATTCTCGCTTAGGATGCGAGAGGTCCCGGGTTCAAATCCCGGACGAGCCCCCA,Pro-AGG,56;tRNA-Pro-AGG-2-1,GGCTCGTTGGTCTAGGGGTATGATTCTCGCTTAGGGTGCGAGAGGTCCCGGGTTCAAATCCCGGACGAGCCCCCA,Pro-AGG,56;tRNA-Pro-CGG-1-1,GGCTCGTTGGTCTAGGGGTATGATTCTCGCTTCGGGTGCGAGAGGTCCCGGGTTCAAATCCCGGACGAGCCCCCA,Pro-CGG,56;tRNA-Pro-CGG-2-1,GGCTCGTTGGTCTAGGGGTATGATTCTCGCTTCGGGTGTGAGAGGTCCCGGGTTCAAATCCCGGACGAGC…	-2.18329	0.220172	0.0309181	0.106237	0.782526	2.96582	14.4827	10.7698	20.3232	3.892	0	2.06235	0.409808	3.58747
tRF-+1:T18-Ser-GCT-4-2	ATGTGGTGGCTTACTTTT	tRF-1	-	-	18	pre_tRNA-Ser-GCT-4-2,TATTACTCCCTATAGCAATCAGGAAACAGTAACTTACCGGGACGAGGTGGCCGAGTGGTTAAGGCGATGGACTGCTAATCCATTGTGCTCTGCACGCGTGGGTTCGAATCCCATCCTCGTCGATGTGGTGGCTTACTTTTGCTTGTAACCAAAGTAAATTTG,Ser-GCT,122	-2.18202	0.220367	0.0162114	0.0755416	4.37759	6.55961	184.325	261.168	175.092	36.5848	25.9002	5.00857	2.04904	31.0914
tRF-60:76-Val-TAC-1-M3	CCCCAGTGGAACCACCA	tRF-3a	-	tRF-17-K672052	17	tRNA-Val-TAC-1-1,GGTTCCATAGTGTAGTGGTTATCACGTCTGCTTTACACGCAGAAGGTCCTGGGTTCGAGCCCCAGTGGAACCACCA,Val-TAC,59;tRNA-Val-TAC-2-1,GGTTCCATAGTGTAGCGGTTATCACGTCTGCTTTACACGCAGAAGGTCCTGGGTTCGAGCCCCAGTGGAACCACCA,Val-TAC,59;tRNA-Val-TAC-3-1,GGTTCCATAGTGTAGTGGTTATCACATCTGCTTTACACGCAGAAGGTCCTGGGTTCAAGCCCCAGTGGAACCACCA,Val-TAC,59	-2.16752	0.222593	0.0293169	0.102723	0.951321	3.11884	3.94983	29.6169	17.1965	4.6704	0.609418	2.94622	0.204904	2.98956
tRF-+1:T22-Ser-TGA-1	GAAGCGGGTGCTCTTATTTTTT	tRF-1	-	-	22	pre_tRNA-Ser-TGA-1-1,TGTTACACTAAAGTGTCTCCGCCTGTCGAATATTCTCGTGGCAGCGATGGCCGAGTGGTTAAGGCGTTGGACTTGAAATCCAATGGGGTCTCCCCGCGCAGGTTCGAACCCTGCTCGCTGCGGAAGCGGGTGCTCTTATTTTTTCTATTTTTTTAAATAAAC,Ser-TGA,122	-2.13825	0.227155	0.0256023	0.0940834	3.46913	5.60738	111.912	123.853	109.432	9.3408	17.3684	3.24084	2.86866	1.19582
tRF-+1:T17-Ser-TGA-1	GAAGCGGGTGCTCTTAT	tRF-1	-	-	17	pre_tRNA-Ser-TGA-1-1,TGTTACACTAAAGTGTCTCCGCCTGTCGAATATTCTCGTGGCAGCGATGGCCGAGTGGTTAAGGCGTTGGACTTGAAATCCAATGGGGTCTCCCCGCGCAGGTTCGAACCCTGCTCGCTGCGGAAGCGGGTGCTCTTATTTTTTCTATTTTTTTAAATAAAC,Ser-TGA,122	-2.13363	0.227884	0.0182391	0.0800395	8.34547	10.4791	2114.48	3478.64	3539.36	460.035	452.797	60.6921	86.6745	185.353
tiRNA-1:31-chrM.Met-CAT	AGTAAGGTCAGCTAAATAAGCTATCGGGCCC	tiRNA-5	-	tRF-31-1OR6QOH04MR1D	31	chrM.tRNA5-MetCAT,AGTAAGGTCAGCTAAATAAGCTATCGGGCCCATACCCCGAAAATGTTGGTTATACCCTTCCCGTACTACCA,Met-CAT,0	-2.12039	0.229985	0.0150597	0.0726549	2.38827	4.50866	107.962	26.9245	23.4498	12.4544	2.74238	3.83009	1.02452	10.1645
tRF-55:76-Val-AAC-1-M5	TCGAAACCGGGCGGAAACACCA	tRF-3b	3008b	tRF-22-WB08Q2B52	22	tRNA-Val-AAC-1-1,GTTTCCGTAGTGTAGTGGTTATCACGTTCGCCTAACACGCGAAAGGTCCCCGGTTCGAAACCGGGCGGAAACACCA,Val-AAC,54;tRNA-Val-AAC-2-1,GTTTCCGTAGTGTAGTGGTCATCACGTTCGCCTAACACGCGAAAGGTCCCCGGTTCGAAACCGGGCGGAAACACCA,Val-AAC,54;tRNA-Val-AAC-4-1,GTTTCCGTAGTGTAGTGGTTATCACGTTCGCCTAACACGCGAAAGGTCCGCGGTTCGAAACCGGGCGGAAACACCA,Val-AAC,54;tRNA-Val-CAC-1-1,GTTTCCGTAGTGTAGTGGTTATCACGTTCGCCTCACACGCGAAAGGTCCCCGGTTCGAAACCGGGCG…	-2.11857	0.230275	0.0410847	0.126329	0.602598	2.72117	23.699	13.4622	10.9432	1.5568	0.304709	1.76773	0.409808	2.39165
tRF-+1:T14-Lys-CTT-1	CGGGTTGTAACTTT	tRF-1	-	-	14	pre_tRNA-Lys-CTT-1-1,CAGTCCTCAAGAAGTAAAAAAGCAGGCTAACGTAACAGGCGCCCGGCTAGCTCAGTCGGTAGAGCATGGGACTCTTAATCCCAGGGTCGTGGGTTCGAGCCCCACGTTGGGCGCGGGTTGTAACTTTTTTCCTGAAACTTAAACGCTTTCACT,Lys-CTT,113	-2.0839	0.235875	0.0272128	0.0976206	1.44586	3.52976	22.3824	21.5396	28.1398	4.6704	0.609418	1.76773	0.819617	5.97912
tRF-55:72-chrM.Val-TAC	ACTTGACCGCTCTGACCA	tRF-3a	-	tRF-18-EY0VWUD2	18	chrM.tRNA2-ValTAC,CAGAGTGTAGCTTAACACAAAGCACCCAACTTACACTTAGGAGATTTCAACTTAACTTGACCGCTCTGACCA,Val-TAC,54	-2.07113	0.237973	0.0538872	0.151092	1.20323	3.27436	50.0312	5.3849	15.6332	3.1136	0	2.06235	0.204904	7.17494
tRF-+1:T24-Cys-GCA-2-4	CTGTGCTCCGGAGTTACCTCGTTT	tRF-1	-	-	24	pre_tRNA-Cys-GCA-2-4,TCCATAGAAATTAACTCTAATGACAACGTAGTGGCGTGGCGGGGGTATAGCTCAGTGGTAGAGCATTTGACTGCAGATCAAGAGGTCCCCGGTTCAAATCCGGGTGCCCCCTCTGTGCTCCGGAGTTACCTCGTTTTGTTGGTCTCCGGAGG,Cys-GCA,112	-2.03696	0.243677	0.0222955	0.089615	2.60851	4.64547	38.1817	24.232	65.6595	17.9032	3.04709	2.94622	0.819617	15.5457
tRF-+1:T26-Ser-GCT-4-3	GCTAAGGAAGTCCTGTGCTCAGTTTT	tRF-1	1003	-	26	pre_tRNA-Ser-GCT-4-3,GAGATGCGGAGGGCAGTCTGAACAGCGAGGGCTGTCTGCAGACGAGGTGGCCGAGTGGTTAAGGCGATGGACTGCTAATCCATTGTGCTCTGCACGCGTGGGTTCGAATCCCATCCTCGTCGGCTAAGGAAGTCCTGTGCTCAGTTTTGTAGCATCAAAACT,Ser-GCT,122	-2.03045	0.244778	0.0228437	0.0897857	5.22269	7.25315	184.325	298.862	483.066	34.2496	34.1274	9.72253	12.2943	44.8434
tRF-64:85-Leu-AAG-1-M4	TCGAATCCCACCGCTGCCACCA	tRF-3b	-	tRF-22-WB863IP52	22	tRNA-Leu-AAG-1-1,GGTAGCGTGGCCGAGCGGTCTAAGGCGCTGGATTAAGGCTCCAGTCTCTTCGGAGGCGTGGGTTCGAATCCCACCGCTGCCACCA,Leu-AAG,63;tRNA-Leu-AAG-2-1,GGTAGCGTGGCCGAGCGGTCTAAGGCGCTGGATTAAGGCTCCAGTCTCTTCGGGGGCGTGGGTTCGAATCCCACCGCTGCCACCA,Leu-AAG,63;tRNA-Leu-TAG-1-1,GGTAGCGTGGCCGAGCGGTCTAAGGCGCTGGATTTAGGCTCCAGTCTCTTCGGAGGCGTGGGTTCGAATCCCACCGCTGCCACCA,Leu-TAG,63;tRNA-Leu-TAG-3-1,GGTAGCGTGGCCGAGTGGTCTAAGGCGCTGGATTTAGGCT…	-2.01315	0.247732	0.043015	0.130489	0.924725	2.93787	32.9153	18.8471	3.12664	3.892	0.609418	2.35698	0.204904	3.58747
tRF-+1:T18-Ser-TGA-1	GAAGCGGGTGCTCTTATT	tRF-1	-	-	18	pre_tRNA-Ser-TGA-1-1,TGTTACACTAAAGTGTCTCCGCCTGTCGAATATTCTCGTGGCAGCGATGGCCGAGTGGTTAAGGCGTTGGACTTGAAATCCAATGGGGTCTCCCCGCGCAGGTTCGAACCCTGCTCGCTGCGGAAGCGGGTGCTCTTATTTTTTCTATTTTTTTAAATAAAC,Ser-TGA,122	-2.00413	0.249285	0.0279076	0.0993248	8.47342	10.4776	2368.58	2837.84	3620.65	560.448	516.481	61.2814	106.755	113.603
tRF-+1:T20-Val-TAC-1-2	TAGCCGTAAGGCGGCTGTTT	tRF-1	-	-	20	pre_tRNA-Val-TAC-1-2,AGTCTATGAATAAAGTCCCAACAATATTCTTCCTCGTAGAGGTTCCATAGTGTAGTGGTTATCACGTCTGCTTTACACGCAGAAGGTCCTGGGTTCGAGCCCCAGTGGAACCATAGCCGTAAGGCGGCTGTTTTTGCTTTTATAGGGTTTCGT,Val-TAC,113	-2.00302	0.249477	0.184831	0.3438	-0.730923	1.2721	21.0658	0	0	0	0.609418	0	0.204904	0.597912
tRF-+1:T19-Ser-TGA-1	GAAGCGGGTGCTCTTATTT	tRF-1	-	-	19	pre_tRNA-Ser-TGA-1-1,TGTTACACTAAAGTGTCTCCGCCTGTCGAATATTCTCGTGGCAGCGATGGCCGAGTGGTTAAGGCGTTGGACTTGAAATCCAATGGGGTCTCCCCGCGCAGGTTCGAACCCTGCTCGCTGCGGAAGCGGGTGCTCTTATTTTTTCTATTTTTTTAAATAAAC,Ser-TGA,122	-1.99374	0.251087	0.02691	0.0973065	9.53422	11.528	5483.68	6822.67	6631.61	1116.23	968.669	133.758	262.482	286.4
tRF-+1:T18-Arg-CCG-1-3	TTGCCATGTTAACGTTTT	tRF-1	-	-	18	pre_tRNA-Arg-CCG-1-3,GAAAGCTTTATGAGAATAGCTGGGAGCCATACAGCCGCAGGGCCGCGTGGCCTAATGGATAAGGCGTCTGATTCCGGATCAGAAGATTGAGGGTTCGAGTCCCTTCGTGGTCGTTGCCATGTTAACGTTTTCTTCCAGCTCCACTTAAAATTT,Arg-CCG,113	-1.97039	0.255185	0.0616773	0.163989	1.64826	3.61865	2.63322	35.0018	34.3931	4.6704	1.21884	0.883866	0.204904	10.1645
tRF-58:76-Tyr-GTA-2-M3	ATTCCGGCTCGAAGGACCA	tRF-3b	-	tRF-19-IR69OKE2	19	tRNA-Tyr-GTA-2-1,CCTTCGATAGCTCAGTTGGTAGAGCGGAGGACTGTAGATCCTTAGGTCGCTGGTTCGATTCCGGCTCGAAGGACCA,Tyr-GTA,57;tRNA-Tyr-GTA-5-1,CCTTCGATAGCTCAGCTGGTAGAGCGGAGGACTGTAGATCCTTAGGTCGCTGGTTCGATTCCGGCTCGAAGGACCA,Tyr-GTA,57;tRNA-Tyr-GTA-7-1,CCTTCGATAGCTCAGCTGGTAGAGCGGAGGACTGTAGATCCTTAGGTCGCTGGTTCAATTCCGGCTCGAAGGACCA,Tyr-GTA,57	-1.95838	0.257317	0.040369	0.126329	1.29944	3.25782	19.7492	16.1547	20.3232	5.4488	0.914126	4.12471	0	4.18538
tRF-1:31-chrM.Lys-TTT	CACTGTAAAGCTAACTTAGCATTAACCTTTT	tRF-5c	-	-	31	chrM.tRNA8-LysTTT,CACTGTAAAGCTAACTTAGCATTAACCTTTTAAGTTAAAGATTAAGAGAACCAACACCTCTTTACAGTGACCA,Lys-TTT,0	-1.94994	0.258827	0.0361424	0.115045	2.43832	4.38826	25.0156	26.9245	28.1398	27.244	2.74238	1.47311	3.48337	4.18538
tRF-+1:T16-Thr-TGT-2	CCTGTTGGCTTACTTT	tRF-1	-	-	16	pre_tRNA-Thr-TGT-2-1,TGGTAAGATCTGTGAATTCCTGAAAACAACGCCTCACGTGGGCTCCATAGCTCAGTGGTTAGAGCACTGGTCTTGTAAACCAGGGGTCGCGAGTTCGATCCTCGCTGGGGCCTCCTGTTGGCTTACTTTTATTTTAATCCATAGCATTTAAAT,Thr-TGT,113	-1.94261	0.260146	0.0255118	0.0940834	3.72672	5.66933	114.545	59.2339	134.446	23.352	6.70359	6.77631	3.68828	25.7102
tRF-1:32-chrM.Lys-TTT	CACTGTAAAGCTAACTTAGCATTAACCTTTTA	tRF-5c	-	-	32	chrM.tRNA8-LysTTT,CACTGTAAAGCTAACTTAGCATTAACCTTTTAAGTTAAAGATTAAGAGAACCAACACCTCTTTACAGTGACCA,Lys-TTT,0	-1.93521	0.261484	0.040215	0.126329	1.99607	3.93127	9.21627	21.5396	21.8865	21.0168	2.74238	1.47311	1.63923	4.7833
tRF-+1:T15-Leu-CAG-2-2	GAGCTCAATTACTTT	tRF-1	-	-	15	pre_tRNA-Leu-CAG-2-2,GAACTTGTGAAGAGGCTTTATGCGCCACACACTGCAAGCAGTCAGGATGGCCGAGCGGTCTAAGGCGCTGCGTTCAGGTCGCAGTCTCCCCTGGAGGCGTGGGTTCGAATCCCACTTCTGACAGAGCTCAATTACTTTTCCTCATCAACACCGCAGATCAGTG,Leu-CAG,123	-1.93231	0.262009	0.0645003	0.167553	0.906638	2.83895	11.8495	5.3849	25.0131	2.3352	1.21884	0.294622	0.409808	4.18538
tRF-+1:T20-Ser-TGA-1	GAAGCGGGTGCTCTTATTTT	tRF-1	1001	-	20	pre_tRNA-Ser-TGA-1-1,TGTTACACTAAAGTGTCTCCGCCTGTCGAATATTCTCGTGGCAGCGATGGCCGAGTGGTTAAGGCGTTGGACTTGAAATCCAATGGGGTCTCCCCGCGCAGGTTCGAACCCTGCTCGCTGCGGAAGCGGGTGCTCTTATTTTTTCTATTTTTTTAAATAAAC,Ser-TGA,122	-1.91472	0.265224	0.0358726	0.114996	9.93653	11.8513	7180.79	8995.47	7827.55	1387.89	1450.11	131.107	280.309	362.335
tRF-52:71-chrM.Pro-TGG	AAAGACTTTTTCTCTGACCA	tRF-3b	-	tRF-20-B2NZW7O6	20	chrM.tRNA15-ProTGG,CAGAGAATAGTTTAAATTAGAATCTTAGCTTTGGGTGCTAATGGTGGAGTTAAAGACTTTTTCTCTGACCA,Pro-TGG,51	-1.91435	0.265291	0.0314248	0.106797	1.72494	3.63929	21.0658	32.3094	21.8865	7.0056	1.52354	3.24084	0.409808	6.57703
tiRNA-1:32-chrM.Pro-TGG	CAGAGAATAGTTTAAATTAGAATCTTAGCTTT	tiRNA-5	-	-	32	chrM.tRNA15-ProTGG,CAGAGAATAGTTTAAATTAGAATCTTAGCTTTGGGTGCTAATGGTGGAGTTAAAGACTTTTTCTCTGACCA,Pro-TGG,0	-1.8891	0.269976	0.0760533	0.18888	1.80414	3.69323	9.21627	8.07735	35.9564	12.4544	3.04709	0.294622	2.45885	0
tRF-+1:T21-Arg-CCT-4	GCCTGTGACTTTTGTCCTTTT	tRF-1	-	-	21	pre_tRNA-Arg-CCT-4-1,AAATAGTTGAATATGTTGTGTGAGCGCGTCGTTTGCAGAAGCCCCAGTGGCCTAATGGATAAGGCATTGGCCTCCTAAGCCAGGGATTGTGGGTTCGAGTCCCATCTGGGGTGGCCTGTGACTTTTGTCCTTTTTTCCCCTTTCTAAACAAAG,Arg-CCT,113	-1.87723	0.272206	0.147105	0.29421	0.0998941	1.97713	0	24.232	4.68996	0.7784	0.609418	0.294622	0.204904	2.39165
tRF-1:15-chrM.Lys-TTT	CACTGTAAAGCTAAC	tRF-5a	-	-	15	chrM.tRNA8-LysTTT,CACTGTAAAGCTAACTTAGCATTAACCTTTTAAGTTAAAGATTAAGAGAACCAACACCTCTTTACAGTGACCA,Lys-TTT,0	-1.87274	0.273054	0.0977135	0.231238	0.843562	2.7163	32.9153	0	7.8166	4.6704	1.21884	0.589244	0.204904	4.18538
tRF-1:32-chrM.Met-CAT	AGTAAGGTCAGCTAAATAAGCTATCGGGCCCA	tRF-5c	-	tRF-32-1OR6QOH04MR12	32	chrM.tRNA5-MetCAT,AGTAAGGTCAGCTAAATAAGCTATCGGGCCCATACCCCGAAAATGTTGGTTATACCCTTCCCGTACTACCA,Met-CAT,0	-1.85568	0.276303	0.0409207	0.126329	1.94639	3.80206	17.1159	29.6169	34.3931	7.0056	3.3518	2.06235	1.43433	2.98956
tRF-55:76-Tyr-GTA-1-M2	TCGAATCCGGCTCGAAGGACCA	tRF-3b	-	tRF-22-WB884U1D2	22	tRNA-Tyr-GTA-1-1,CCTTCGATAGCTCAGTTGGTAGAGCGGAGGACTGTAGATCCTTAGGTCGCTGGTTCGAATCCGGCTCGAAGGACCA,Tyr-GTA,54;tRNA-Tyr-GTA-8-1,CTTTCGATAGCTCAGTTGGTAGAGCGGAGGACTGTAGATCCTTAGGTCGCTGGTTCGAATCCGGCTCGAAGGACCA,Tyr-GTA,54	-1.85192	0.277023	0.0611078	0.163436	0.97942	2.83134	28.9654	10.7698	9.37992	3.1136	0.304709	3.24084	0	4.18538
tRF-+1:T21-Ser-TGA-1	GAAGCGGGTGCTCTTATTTTT	tRF-1	-	-	21	pre_tRNA-Ser-TGA-1-1,TGTTACACTAAAGTGTCTCCGCCTGTCGAATATTCTCGTGGCAGCGATGGCCGAGTGGTTAAGGCGTTGGACTTGAAATCCAATGGGGTCTCCCCGCGCAGGTTCGAACCCTGCTCGCTGCGGAAGCGGGTGCTCTTATTTTTTCTATTTTTTTAAATAAAC,Ser-TGA,122	-1.82584	0.282077	0.0463652	0.136654	7.26373	9.08958	1186.27	1300.45	1186.56	165.799	227.313	17.9719	46.3084	50.2246
tRF-1:23-Asp-GTC-2-M2	TCCTCGTTAGTATAGTGGTGAGT	tRF-5b	5032b	tRF-23-897PVP94Z	23	tRNA-Asp-GTC-2-1,TCCTCGTTAGTATAGTGGTGAGTATCCCCGCCTGTCACGCGGGAGACCGGGGTTCGATTCCCCGACGGGGAGCCA,Asp-GTC,0;tRNA-Asp-GTC-3-1,TCCTCGTTAGTATAGTGGTGAGTGTCCCCGTCTGTCACGCGGGAGACCGGGGTTCGATTCCCCGACGGGGAGCCA,Asp-GTC,0	-1.80661	0.285861	0.0594304	0.160853	3.10377	4.91039	9.21627	40.3867	62.5328	35.028	4.26592	0.589244	4.7128	11.9582
tRF-+1:T25-Ser-GCT-4-3	GCTAAGGAAGTCCTGTGCTCAGTTT	tRF-1	-	-	25	pre_tRNA-Ser-GCT-4-3,GAGATGCGGAGGGCAGTCTGAACAGCGAGGGCTGTCTGCAGACGAGGTGGCCGAGTGGTTAAGGCGATGGACTGCTAATCCATTGTGCTCTGCACGCGTGGGTTCGAATCCCATCCTCGTCGGCTAAGGAAGTCCTGTGCTCAGTTTTGTAGCATCAAAACT,Ser-GCT,122	-1.80482	0.286217	0.0408478	0.126329	5.4347	7.23952	176.426	271.937	512.769	27.244	38.3933	20.0343	14.7531	41.8538
tRF-1:22-Val-AAC-1-M7	GTTTCCGTAGTGTAGTGGTTAT	tRF-5b	-	tRF-22-79MP9P9NI	22	tRNA-Val-AAC-1-1,GTTTCCGTAGTGTAGTGGTTATCACGTTCGCCTAACACGCGAAAGGTCCCCGGTTCGAAACCGGGCGGAAACACCA,Val-AAC,0;tRNA-Val-AAC-3-1,GTTTCCGTAGTGTAGTGGTTATCACGTTCGCCTAACACGCGAAAGGTCCCTGGATCAAAACCAGGCGGAAACACCA,Val-AAC,0;tRNA-Val-AAC-4-1,GTTTCCGTAGTGTAGTGGTTATCACGTTCGCCTAACACGCGAAAGGTCCGCGGTTCGAAACCGGGCGGAAACACCA,Val-AAC,0;tRNA-Val-AAC-5-1,GTTTCCGTAGTGTAGTGGTTATCACGTTTGCCTAACACGCGAAAGGTCCCCGGTTCGAAACCGGGCAGAA…	-1.80272	0.286633	0.0495068	0.142529	1.95629	3.75901	19.7492	26.9245	12.5066	16.3464	4.26592	3.53546	0.819617	1.79374
tRF-+1:T15-Pro-TGG-3-2	TCGTGGCTACTGTTT	tRF-1	-	-	15	pre_tRNA-Pro-TGG-3-2,GAGAAATTCAGAGTGATAGGAAGCACCACTCAGCTACAGTGGCTCGTTGGTCTAGGGGTATGATTCTCGCTTTGGGTGCGAGAGGTCCCGGGTTCAAATCCCGGACGAGCCCTCGTGGCTACTGTTTTTCCACCCCCTTTTGTCAACTACTG,Pro-TGG,112	-1.79226	0.288719	0.0459474	0.136633	6.64511	8.43737	566.143	115.775	1292.87	130.771	63.6841	42.4256	28.6866	175.786
tRF-1:16-Leu-TAG-2	GGTAGTGTGGCCGAGC	tRF-5a	-	tRF-16-RP9830D	16	tRNA-Leu-TAG-2-1,GGTAGTGTGGCCGAGCGGTCTAAGGCGCTGGATTTAGGCTCCAGTCTCTTCGGGGGCGTGGGTTCGAATCCCACCACTGCCACCA,Leu-TAG,0	-1.78842	0.289489	0.0677445	0.17398	2.06882	3.85724	36.8651	26.9245	3.12664	18.6816	0.609418	4.71395	2.86866	1.19582
tRF-+1:T14-Leu-AAG-2-4	GGGTTGCTGTCTTT	tRF-1	-	-	14	pre_tRNA-Leu-AAG-2-4,AAGCATTAAGTAGCTTTCTGGCATAAACATATTGCAGCTGGGTAGCGTGGCCGAGCGGTCTAAGGCGCTGGATTAAGGCTCCAGTCTCTTCGGGGGCGTGGGTTCGAATCCCACCGCTGCCAGGGTTGCTGTCTTTTTGTCCCCGCTGCATACACTCCTGGC,Leu-AAG,122	-1.77127	0.292951	0.0444495	0.133941	2.82311	4.59438	86.8963	59.2339	31.2664	7.784	2.43767	4.71395	0.409808	20.9269
tRF-+1:T15-Lys-TTT-3-5	GCATGTCTTTGCTTT	tRF-1	-	-	15	pre_tRNA-Lys-TTT-3-5,AGAACCCTCTTATAAGCAAAAAGTAAAGCTCTCGTGAAGAGCCCGGATAGCTCAGTCGGTAGAGCATCAGACTTTTAATCTGAGGGTCCAGGGTTCAAGTCCCTGTTCGGGCGGCATGTCTTTGCTTTTGGGTACCGCACTTCGCATAAAATG,Lys-TTT,113	-1.76337	0.294559	0.0905497	0.220045	1.49084	3.25421	7.89966	8.07735	39.083	2.3352	2.74238	1.17849	1.22943	1.19582
tRF-54:71-chrM.Pro-TGG	AGACTTTTTCTCTGACCA	tRF-3a	-	tRF-18-FIZ9WUD2	18	chrM.tRNA15-ProTGG,CAGAGAATAGTTTAAATTAGAATCTTAGCTTTGGGTGCTAATGGTGGAGTTAAAGACTTTTTCTCTGACCA,Pro-TGG,53	-1.74084	0.299195	0.0541524	0.151092	1.98618	3.72702	25.0156	18.8471	28.1398	9.3408	0.914126	3.24084	0.614713	10.1645
tRF-+1:T15-Trp-CCA-2	AGGTTGGGTTTTTTT	tRF-1	-	-	15	pre_tRNA-Trp-CCA-2-1,AAACGAGGTCTTTAGCGATGCGGAGTCACCACTTTGGTGTGACCTCGTGGCGCAATGGTAGCGCGTCTGACTCCAGATCAGAAGGTTGCGTGTTCAAGTCACGTCGGGGTCAAGGTTGGGTTTTTTTTTTTTTCTTTCTTAATTGTAGAGGA,Trp-CCA,112	-1.73875	0.299629	0.105488	0.24081	1.18504	2.92379	18.4325	8.07735	23.4498	1.5568	2.43767	0.294622	0.409808	3.58747
tRF-59:76-Arg-ACG-1-M2	CTCCTGGCTGGCTCGCCA	tRF-3a	-	tRF-18-476YQSD2	18	tRNA-Arg-ACG-1-1,GGGCCAGTGGCGCAATGGATAACGCGTCTGACTACGGATCAGAAGATTCCAGGTTCGACTCCTGGCTGGCTCGCCA,Arg-ACG,58;tRNA-Arg-ACG-2-1,GGGCCAGTGGCGCAATGGATAACGCGTCTGACTACGGATCAGAAGATTCTAGGTTCGACTCCTGGCTGGCTCGCCA,Arg-ACG,58	-1.73505	0.300398	0.0453076	0.135623	2.82663	4.56168	10.5329	61.9263	37.5197	22.5736	2.74238	7.9548	1.22943	13.1541
tRF-+1:T16-Pro-TGG-3-2	TCGTGGCTACTGTTTT	tRF-1	-	-	16	pre_tRNA-Pro-TGG-3-2,GAGAAATTCAGAGTGATAGGAAGCACCACTCAGCTACAGTGGCTCGTTGGTCTAGGGGTATGATTCTCGCTTTGGGTGCGAGAGGTCCCGGGTTCAAATCCCGGACGAGCCCTCGTGGCTACTGTTTTTCCACCCCCTTTTGTCAACTACTG,Pro-TGG,112	-1.71298	0.305029	0.048675	0.141033	6.43863	8.15161	576.675	156.162	895.783	136.22	49.0581	36.8278	27.2523	154.859
tRF-65:86-Leu-CAA-1-M5	TCGAATCCCACTTCTGACACCA	tRF-3b	3012b	tRF-22-WB86N7O52	22	tRNA-Leu-CAA-1-1,GTCAGGATGGCCGAGTGGTCTAAGGCGCCAGACTCAAGTTCTGGTCTCCAATGGAGGCGTGGGTTCGAATCCCACTTCTGACACCA,Leu-CAA,64;tRNA-Leu-CAA-2-1,GTCAGGATGGCCGAGTGGTCTAAGGCGCCAGACTCAAGTTCTGGTCTCCGTATGGAGGCGTGGGTTCGAATCCCACTTCTGACACCA,Leu-CAA,65;tRNA-Leu-CAA-3-1,GTCAGGATGGCCGAGTGGTCTAAGGCGCCAGACTCAAGTTCTGGTCTCCGCATGGAGGCGTGGGTTCGAATCCCACTTCTGACACCA,Leu-CAA,65;tRNA-Leu-CAA-4-1,GTCAGGATGGCCGAGTGGTCTAAGGCGCCAGACTC…	-1.68411	0.311194	0.056833	0.155688	2.88721	4.57132	61.8807	61.9263	31.2664	12.4544	0.914126	10.0171	0.409808	19.1332
tRF-54:75-Gln-CTG-1-M2	TCAAATCTCGGTGGAACCTCCA	tRF-3b	-	tRF-22-8BWS72092	22	tRNA-Gln-CTG-1-1,GGTTCCATGGTGTAATGGTTAGCACTCTGGACTCTGAATCCAGCGATCCGAGTTCAAATCTCGGTGGAACCTCCA,Gln-CTG,53;tRNA-Gln-CTG-5-1,GGTTCCATGGTGTAATGGTTAGCACTCTGGACTCTGAATCCGGTAATCCGAGTTCAAATCTCGGTGGAACCTCCA,Gln-CTG,53	-1.67503	0.31316	0.0553481	0.152545	2.30595	3.98098	31.5987	48.4641	17.1965	10.1192	2.74238	3.53546	0.614713	10.7624
tRF-+1:T33-His-GTG-1-9	TTGTGGAAACAATGGTACGGCAAGGGCCTCTTT	tRF-1	-	-	33	pre_tRNA-His-GTG-1-9,AACACTGGGTCAGCTGCTCGTCGTGGCGTCCCGGTAGCTCGCCGTGATCGTATAGTGGTTAGTACTCTGCGTTGTGGCCGCAGCAACCTCGGTTCGAATCCGAGTCACGGCATTGTGGAAACAATGGTACGGCAAGGGCCTCTTTTTAGACT,His-GTG,112	-1.63352	0.322301	0.122221	0.263066	1.30808	2.9416	9.21627	21.5396	18.7598	2.3352	1.52354	0.294622	0.204904	7.17494
tRF-59:75-Trp-CCA-1-M5	TCACGTCGGGGTCACCA	tRF-3a	-	tRF-17-8HWKS52	17	tRNA-Trp-CCA-1-1,GGCCTCGTGGCGCAACGGTAGCGCGTCTGACTCCAGATCAGAAGGTTGCGTGTTCAAATCACGTCGGGGTCACCA,Trp-CCA,58;tRNA-Trp-CCA-2-1,GACCTCGTGGCGCAATGGTAGCGCGTCTGACTCCAGATCAGAAGGTTGCGTGTTCAAGTCACGTCGGGGTCACCA,Trp-CCA,58;tRNA-Trp-CCA-3-1,GACCTCGTGGCGCAACGGTAGCGCGTCTGACTCCAGATCAGAAGGTTGCGTGTTCAAATCACGTCGGGGTCACCA,Trp-CCA,58;tRNA-Trp-CCA-4-1,GACCTCGTGGCGCAACGGTAGCGCGTCTGACTCCAGATCAGAAGGCTGCGTGTTCGAATCACGTCGGGGT…	-1.60681	0.328323	0.0629233	0.165844	2.44381	4.05062	21.0658	56.5414	17.1965	12.4544	3.65651	6.18706	0.819617	7.17494
tRF-+1:T23-Arg-TCG-1	AAGGGAGGTTATGATTAACTTTT	tRF-1	-	-	23	pre_tRNA-Arg-TCG-1-1,ACGTTTTTATAAGTTGCTCAAGAGACGGTAACAACCGACGGGCCGCGTGGCCTAATGGATAAGGCGTCTGACTTCGGATCAGAAGATTGCAGGTTCGAGTCCTGCCGCGGTCGAAGGGAGGTTATGATTAACTTTTAGTTTATTCCTCCCTCA,Arg-TCG,113	-1.57048	0.336696	0.212575	0.372418	0.759917	2.3304	7.89966	21.5396	9.37992	0	0	0	0.614713	5.38121
tRF-25:38-chrM.His-GTG	CAGATTGTGAATCT	tRF-2	-	-	14	chrM.tRNA11-HisGTG,GTAAATATAGTTTAACCAAAACATCAGATTGTGAATCTGACAACAGAGGCTTACGACCCCTTATTTACCCCA,His-GTG,24	-1.54735	0.342137	0.201878	0.364995	0.811445	2.3588	38.1817	0	6.25328	0	0	2.35698	0.204904	4.18538
tRF-+1:T14-Leu-AAG-2	GTTTGTGGTAGTTT	tRF-1	-	-	14	pre_tRNA-Leu-AAG-2-1,CATAACTGAAGGAAAATATGTAAATACCCAGCGGCAAAGAGGTAGCGTGGCCGAGCGGTCTAAGGCGCTGGATTAAGGCTCCAGTCTCTTCGGGGGCGTGGGTTCGAATCCCACCGCTGCCAGTTTGTGGTAGTTTTGTCACTTTTGTCCCCTATGGGTTAC,Leu-AAG,122	-1.54572	0.342526	0.145365	0.292315	2.24875	3.79447	25.0156	2.69245	62.5328	0	3.65651	1.47311	2.04904	4.7833
tRF-+1:T15-Ser-TGA-1	GAAGCGGGTGCTCTT	tRF-1	-	-	15	pre_tRNA-Ser-TGA-1-1,TGTTACACTAAAGTGTCTCCGCCTGTCGAATATTCTCGTGGCAGCGATGGCCGAGTGGTTAAGGCGTTGGACTTGAAATCCAATGGGGTCTCCCCGCGCAGGTTCGAACCCTGCTCGCTGCGGAAGCGGGTGCTCTTATTTTTTCTATTTTTTTAAATAAAC,Ser-TGA,122	-1.53136	0.345951	0.0699841	0.178716	5.8627	7.39406	176.426	376.943	372.07	104.306	67.3406	38.0062	9.6305	53.8121
tRF-60:76-Tyr-GTA-3-M2	TCCGGCTCGGAGGACCA	tRF-3a	3031a	tRF-17-88481D2	17	tRNA-Tyr-GTA-3-1,CCTTCGATAGCTCAGTTGGTAGAGCGGAGGACTGTAGATCCTTAGGTCGCTGGTTCGAATCCGGCTCGGAGGACCA,Tyr-GTA,59;tRNA-Tyr-GTA-6-1,CCTTCGATAGCTCAGCTGGTAGAGCGGAGGACTGTAGATCCTTAGGTCGCTGGTTCGAATCCGGCTCGGAGGACCA,Tyr-GTA,59	-1.50747	0.351727	0.105128	0.24081	1.83413	3.34161	48.7146	21.5396	4.68996	4.6704	2.74238	3.53546	0.614713	4.18538
tRF-+1:T16-Leu-TAA-3	AAGAGGAGTTGTTTTT	tRF-1	-	-	16	pre_tRNA-Leu-TAA-3-1,TACCCGAGTTGCTTTAAAATAAAACATTGTTTTATCAGTTACCAGAATGGCCGAGTGGTTAAGGCGTTGGACTTAAGATCCAATGGATTCATATCCGCGTGGGTTCGAACCCCACTTCTGGTAAAGAGGAGTTGTTTTTCCTGGCAAAAACCTTTTTTCCTAA,Leu-TAA,123	-1.50039	0.353457	0.116875	0.255205	2.14119	3.64158	11.8495	10.7698	50.0263	3.1136	1.82825	2.6516	1.02452	9.56659
tRF-1:30-Gly-CCC-2	GCGCCGCTGGTGTAGTGGTATCATGCAAGA	tRF-5c	5007c	tRF-30-Q1Q89P9L8422	30	tRNA-Gly-CCC-2-1,GCGCCGCTGGTGTAGTGGTATCATGCAAGATTCCCATTCTTGCGACCCGGGTTCGATTCCCGGGCGGCGCACCA,Gly-CCC,0	-1.46068	0.363321	0.10341	0.238477	5.67742	7.13811	571.409	37.6943	368.944	42.812	12.7978	70.7093	24.9983	29.8956
tRF-+1:T18-Arg-ACG-1-2	GTGTAAGCAGGGTCGTTT	tRF-1	-	-	18	pre_tRNA-Arg-ACG-1-2,CTAGTTTCTTATGAAATACCTCGCCCCTAAGGTACGCGCAGGGCCAGTGGCGCAATGGATAACGCGTCTGACTACGGATCAGAAGATTCCAGGTTCGACTCCTGGCTGGCTCGGTGTAAGCAGGGTCGTTTTACAACTTTCTGACTCCGCAGG,Arg-ACG,113	-1.45577	0.364561	0.129232	0.270429	1.83238	3.28815	31.5987	5.3849	23.4498	4.6704	2.13296	1.17849	0.614713	8.37077
tRF-+1:T19-Arg-ACG-1-2	GTGTAAGCAGGGTCGTTTT	tRF-1	1006	-	19	pre_tRNA-Arg-ACG-1-2,CTAGTTTCTTATGAAATACCTCGCCCCTAAGGTACGCGCAGGGCCAGTGGCGCAATGGATAACGCGTCTGACTACGGATCAGAAGATTCCAGGTTCGACTCCTGGCTGGCTCGGTGTAAGCAGGGTCGTTTTACAACTTTCTGACTCCGCAGG,Arg-ACG,113	-1.45508	0.364735	0.114728	0.254202	2.09284	3.54792	22.3824	32.3094	25.0131	3.1136	1.82825	1.47311	0.614713	11.9582
tRF-60:76-Lys-CTT-1-M4	CCCCACGTTGGGCGCCA	tRF-3a	-	tRF-17-K6MY6V2	17	tRNA-Lys-CTT-1-1,GCCCGGCTAGCTCAGTCGGTAGAGCATGGGACTCTTAATCCCAGGGTCGTGGGTTCGAGCCCCACGTTGGGCGCCA,Lys-CTT,59;tRNA-Lys-CTT-2-1,GCCCGGCTAGCTCAGTCGGTAGAGCATGAGACTCTTAATCTCAGGGTCGTGGGTTCGAGCCCCACGTTGGGCGCCA,Lys-CTT,59;tRNA-Lys-CTT-3-1,GCCCGGCTAGCTCAGTCGGTAGAGCATGAGACCCTTAATCTCAGGGTCGTGGGTTCGAGCCCCACGTTGGGCGCCA,Lys-CTT,59;tRNA-Lys-CTT-4-1,GCCCGGCTAGCTCAGTCGGTAGAGCATGGGACTCTTAATCTCAGGGTCGTGGGTTCGAGCCCCACGT…	-1.41883	0.374016	0.139426	0.285162	1.58868	3.00751	11.8495	24.232	10.9432	5.4488	2.74238	2.06235	0.409808	4.18538
tRF-+1:T16-Cys-GCA-4	CAATGGCTTGGTTTTT	tRF-1	-	-	16	pre_tRNA-Cys-GCA-4-1,TTAGCACCCAAGGAGCCGCCTCCAGGCGCTGTAGAGGCGCGGGGGTATAGCTCAGTGGTAGAGCATTTGACTGCAGATCAAGAGGTCCCTGGTTCAAATCCGGGTGCCCCCTCAATGGCTTGGTTTTTCCTTCCCCTTGTTAACCATCTGTT,Cys-GCA,112	-1.39947	0.379069	0.261902	0.422282	0.552957	1.95243	22.3824	0	4.68996	1.5568	1.82825	0.294622	0.204904	1.79374
tRF-+1:T17-Pro-TGG-3-2	TCGTGGCTACTGTTTTT	tRF-1	-	-	17	pre_tRNA-Pro-TGG-3-2,GAGAAATTCAGAGTGATAGGAAGCACCACTCAGCTACAGTGGCTCGTTGGTCTAGGGGTATGATTCTCGCTTTGGGTGCGAGAGGTCCCGGGTTCAAATCCCGGACGAGCCCTCGTGGCTACTGTTTTTCCACCCCCTTTTGTCAACTACTG,Pro-TGG,112	-1.39825	0.379389	0.10745	0.244058	3.6146	5.01285	93.4794	21.5396	81.2927	16.3464	8.53185	4.12471	3.27847	22.1227
tRF-1:23-Val-AAC-2	GTTTCCGTAGTGTAGTGGTCATC	tRF-5b	5026b	tRF-23-79MP9P9MDD	23	tRNA-Val-AAC-2-1,GTTTCCGTAGTGTAGTGGTCATCACGTTCGCCTAACACGCGAAAGGTCCCCGGTTCGAAACCGGGCGGAAACACCA,Val-AAC,0	-1.39331	0.38069	0.112806	0.253673	4.3518	5.74511	55.2976	150.777	54.7162	53.7096	18.5872	7.66017	9.42559	10.7624
tRF-+1:T32-Gly-CCC-1	AGAGGGTCTTTTTCACCCCGCTGTTGCTCTTT	tRF-1	-	-	32	pre_tRNA-Gly-CCC-1-1,TACTGTTTTCTGTTATCCTGCAGGCGGTTGTTACGCAGAGGCATTGGTGGTTCAGTGGTAGAATTCTCGCCTCCCACGCGGGAGACCCGGGTTCAATTCCCGGCCAATGCAAGAGGGTCTTTTTCACCCCGCTGTTGCTCTTTATCTGTCT,Gly-CCC,111	-1.36659	0.387807	0.214561	0.374447	2.02788	3.39447	61.8807	16.1547	1.56332	5.4488	1.21884	0.589244	3.68828	1.19582
tRF-+1:T14-Arg-CCT-4	GCCTGTGACTTTTG	tRF-1	-	-	14	pre_tRNA-Arg-CCT-4-1,AAATAGTTGAATATGTTGTGTGAGCGCGTCGTTTGCAGAAGCCCCAGTGGCCTAATGGATAAGGCATTGGCCTCCTAAGCCAGGGATTGTGGGTTCGAGTCCCATCTGGGGTGGCCTGTGACTTTTGTCCTTTTTTCCCCTTTCTAAACAAAG,Arg-CCT,113	-1.3596	0.389691	0.123525	0.263676	3.70291	5.06251	75.0468	35.0018	95.3626	13.2328	6.70359	5.00857	2.04904	33.4831
tRF-+1:T21-Arg-ACG-1	TTCGACTTTAGTGGAAACTTT	tRF-1	-	-	21	pre_tRNA-Arg-ACG-1-1,TTTTTTTCTATAGGTATAACGCCTGTCTTCGTTCGTCAGAGGGCCAGTGGCGCAATGGATAACGCGTCTGACTACGGATCAGAAGATTCCAGGTTCGACTCCTGGCTGGCTCGTTCGACTTTAGTGGAAACTTTGAGGTTTACATAAATGCCC,Arg-ACG,113	-1.3527	0.391558	0.127174	0.268611	3.35189	4.70459	61.8807	43.0792	68.7861	7.0056	4.87534	2.35698	5.32751	13.752
tRF-1:16-Tyr-GTA-4-M4	CCTTCGATAGCTCAGC	tRF-5a	-	-	16	tRNA-Tyr-GTA-4-1,CCTTCGATAGCTCAGCTGGTAGAGCGGAGGACTGTAGATCCTTAGGTCGCTGGTTCGATTCCAGCTCGAAGGACCA,Tyr-GTA,0;tRNA-Tyr-GTA-5-1,CCTTCGATAGCTCAGCTGGTAGAGCGGAGGACTGTAGATCCTTAGGTCGCTGGTTCGATTCCGGCTCGAAGGACCA,Tyr-GTA,0;tRNA-Tyr-GTA-6-1,CCTTCGATAGCTCAGCTGGTAGAGCGGAGGACTGTAGATCCTTAGGTCGCTGGTTCGAATCCGGCTCGGAGGACCA,Tyr-GTA,0;tRNA-Tyr-GTA-7-1,CCTTCGATAGCTCAGCTGGTAGAGCGGAGGACTGTAGATCCTTAGGTCGCTGGTTCAATTCCGGCTCGAA…	-1.34486	0.393693	0.111294	0.251526	2.61368	3.95854	30.282	43.0792	21.8865	9.3408	3.04709	5.59782	1.22943	10.7624
tRF-58:75-Trp-CCA-1-M4	ATCACGTCGGGGTCACCA	tRF-3a	-	tRF-18-H5S8R6D2	18	tRNA-Trp-CCA-1-1,GGCCTCGTGGCGCAACGGTAGCGCGTCTGACTCCAGATCAGAAGGTTGCGTGTTCAAATCACGTCGGGGTCACCA,Trp-CCA,57;tRNA-Trp-CCA-3-1,GACCTCGTGGCGCAACGGTAGCGCGTCTGACTCCAGATCAGAAGGTTGCGTGTTCAAATCACGTCGGGGTCACCA,Trp-CCA,57;tRNA-Trp-CCA-4-1,GACCTCGTGGCGCAACGGTAGCGCGTCTGACTCCAGATCAGAAGGCTGCGTGTTCGAATCACGTCGGGGTCACCA,Trp-CCA,57;tRNA-Trp-CCA-5-1,GACCTCGTGGCGCAACGGCAGCGCGTCTGACTCCAGATCAGAAGGTTGCGTGTTCAAATCACGTCGGGGT…	-1.32002	0.40053	0.12119	0.262095	3.35394	4.67396	55.2976	91.5433	29.7031	10.1192	3.04709	10.901	1.22943	23.9165
tRF-1:14-Val-TAC-1-M3	GGTTCCATAGTGTA	tRF-5a	5020a	-	14	tRNA-Val-TAC-1-1,GGTTCCATAGTGTAGTGGTTATCACGTCTGCTTTACACGCAGAAGGTCCTGGGTTCGAGCCCCAGTGGAACCACCA,Val-TAC,0;tRNA-Val-TAC-2-1,GGTTCCATAGTGTAGCGGTTATCACGTCTGCTTTACACGCAGAAGGTCCTGGGTTCGAGCCCCAGTGGAACCACCA,Val-TAC,0;tRNA-Val-TAC-3-1,GGTTCCATAGTGTAGTGGTTATCACATCTGCTTTACACGCAGAAGGTCCTGGGTTCAAGCCCCAGTGGAACCACCA,Val-TAC,0	-1.31121	0.402982	0.169175	0.323252	2.08239	3.3936	21.0658	2.69245	12.5066	15.568	2.13296	3.24084	1.22943	6.57703
tRF-+1:T14-Ser-AGA-2-5	GGAATGTCAGCTTT	tRF-1	-	-	14	pre_tRNA-Ser-AGA-2-5,GAGTCTACATGCACTCTCACCGCAAAAATTCACACAGCCAGTAGTCGTGGCCGAGTGGTTAAGGCGATGGACTAGAAATCCATTGGGGTCTCCCCGCGCAGGTTCGAATCCTGCCGACTACGGGAATGTCAGCTTTTTGCCGTCAACACTTACTTTTTGTGT,Ser-AGA,122	-1.31003	0.403312	0.139032	0.285162	2.84824	4.15827	26.3322	26.9245	54.7162	6.2272	2.74238	3.83009	0.819617	20.329
tRF-1:29-chrM.Met-CAT	AGTAAGGTCAGCTAAATAAGCTATCGGGC	tRF-5c	-	tRF-29-1OR6QOH04MI9	29	chrM.tRNA5-MetCAT,AGTAAGGTCAGCTAAATAAGCTATCGGGCCCATACCCCGAAAATGTTGGTTATACCCTTCCCGTACTACCA,Met-CAT,0	-1.29335	0.408002	0.157196	0.308925	2.15528	3.44864	22.3824	13.4622	25.0131	7.0056	1.21884	2.06235	0.819617	12.5562
tRF-58:75-Gln-CTG-1-M2	ATCTCGGTGGAACCTCCA	tRF-3a	-	tRF-18-H9R8B7D2	18	tRNA-Gln-CTG-1-1,GGTTCCATGGTGTAATGGTTAGCACTCTGGACTCTGAATCCAGCGATCCGAGTTCAAATCTCGGTGGAACCTCCA,Gln-CTG,57;tRNA-Gln-CTG-5-1,GGTTCCATGGTGTAATGGTTAGCACTCTGGACTCTGAATCCGGTAATCCGAGTTCAAATCTCGGTGGAACCTCCA,Gln-CTG,57	-1.29063	0.408772	0.116541	0.255205	5.98072	7.27135	197.492	398.483	225.118	124.544	43.5734	66.8792	8.81088	95.6659
tiRNA-1:35-Leu-TAG-3	GGTAGCGTGGCCGAGTGGTCTAAGGCGCTGGATTT	tiRNA-5	-	-	35	tRNA-Leu-TAG-3-1,GGTAGCGTGGCCGAGTGGTCTAAGGCGCTGGATTTAGGCTCCAGTCATTTCGATGGCGTGGGTTCGAATCCCACCGCTGCCACCA,Leu-TAG,0	-1.26717	0.415474	0.136394	0.282798	3.6749	4.94207	32.9153	40.3867	50.0263	36.5848	6.39888	7.66017	5.53241	15.5457
tRF-+1:T15-Asp-GTC-2-11	AGTACTAGCAGTTTT	tRF-1	-	-	15	pre_tRNA-Asp-GTC-2-11,TCTCAGATCAAGGATTCGGAGAAAGGTCTCTACAGGTCCCTCCTCGTTAGTATAGTGGTGAGTATCCCCGCCTGTCACGCGGGAGACCGGGGTTCGATTCCCCGACGGGGAGAGTACTAGCAGTTTTGAAACTTCTATCTTTTTGCTTTCAT,Asp-GTC,112	-1.26113	0.417216	0.251158	0.413452	1.45306	2.7142	3.94983	2.69245	29.7031	1.5568	2.74238	0.883866	0	5.97912
tRF-1:16-Ala-AGC-2-M11	GGGGGTGTAGCTCAGT	tRF-5a	-	-	16	tRNA-Ala-AGC-2-1,GGGGGTGTAGCTCAGTGGTAGAGCGCGTGCTTAGCATGCACGAGGCCCCGGGTTCAATCCCCGGCACCTCCACCA,Ala-AGC,0;tRNA-Ala-AGC-3-1,GGGGGTGTAGCTCAGTGGTAGAGCGCGTGCTTAGCATGTACGAGGTCCCGGGTTCAATCCCCGGCACCTCCACCA,Ala-AGC,0;tRNA-Ala-AGC-5-1,GGGGGTGTAGCTCAGTGGTAGAGCGCGTGCTTAGCATGCACGAGGCCCTGGGTTCAATCCCCAGCACCTCCACCA,Ala-AGC,0;tRNA-Ala-AGC-7-1,GGGGGTGTAGCTCAGTGGTAGAGCGCGTGCTTAGCATGCACGAGGCCCCGGGTTCAATCCCTGGCACCTCCAC…	-1.24786	0.421071	0.310696	0.466876	1.2578	2.50566	42.1315	8.07735	0	0.7784	0.304709	1.47311	1.43433	2.98956
tRF-64:85-Ser-AGA-1-M6	TCGAATCCTGCCGACTACGCCA	tRF-3b	3014b	tRF-22-WB8Y3DUV2	22	tRNA-Ser-AGA-1-1,GTAGTCGTGGCCGAGTGGTTAAGGCGATGGACTAGAAATCCATTGGGGTTTCCCCGCGCAGGTTCGAATCCTGCCGACTACGCCA,Ser-AGA,63;tRNA-Ser-AGA-2-1,GTAGTCGTGGCCGAGTGGTTAAGGCGATGGACTAGAAATCCATTGGGGTCTCCCCGCGCAGGTTCGAATCCTGCCGACTACGCCA,Ser-AGA,63;tRNA-Ser-AGA-3-1,GTAGTCGTGGCCGAGTGGTTAAGGCGATGGACTAGAAATCCATTGGGGTTTCCCCACGCAGGTTCGAATCCTGCCGACTACGCCA,Ser-AGA,63;tRNA-Ser-AGA-4-1,GTAGTCGTGGCCGAGTGGTTAAGGTGATGGACTAGAAACC…	-1.24752	0.421172	0.261809	0.422282	0.925007	2.17253	27.6488	8.07735	1.56332	0.7784	0.304709	1.47311	0.204904	5.38121
tRF-+1:T22-Arg-TCG-1	AAGGGAGGTTATGATTAACTTT	tRF-1	-	-	22	pre_tRNA-Arg-TCG-1-1,ACGTTTTTATAAGTTGCTCAAGAGACGGTAACAACCGACGGGCCGCGTGGCCTAATGGATAAGGCGTCTGACTTCGGATCAGAAGATTGCAGGTTCGAGTCCTGCCGCGGTCGAAGGGAGGTTATGATTAACTTTTAGTTTATTCCTCCCTCA,Arg-TCG,113	-1.24367	0.422298	0.265209	0.423585	2.06888	3.31255	14.4827	26.9245	29.7031	0	3.04709	0	0.204904	12.5562
tRF-1:28-chrM.Ser-TGA	GAAAAAGTCATGGAGGCCATGGGGTTGG	tRF-5c	-	tRF-28-OB1690PQR304	28	chrM.tRNA17-SerTGA,GAAAAAGTCATGGAGGCCATGGGGTTGGCTTGAAACCAGCTTTGGGGGGTTCGATTCCTTCCTTTTTTGCCA,Ser-TGA,0	-1.24044	0.423242	0.24596	0.411755	1.55425	2.79469	26.3322	2.69245	20.3232	0.7784	0	5.59782	0.614713	4.18538
tRF-+1:T25-Cys-GCA-2-4	CTGTGCTCCGGAGTTACCTCGTTTT	tRF-1	-	-	25	pre_tRNA-Cys-GCA-2-4,TCCATAGAAATTAACTCTAATGACAACGTAGTGGCGTGGCGGGGGTATAGCTCAGTGGTAGAGCATTTGACTGCAGATCAAGAGGTCCCCGGTTCAAATCCGGGTGCCCCCTCTGTGCTCCGGAGTTACCTCGTTTTGTTGGTCTCCGGAGG,Cys-GCA,112	-1.23515	0.424799	0.166104	0.320851	2.72426	3.95941	26.3322	21.5396	45.3363	6.2272	3.04709	2.06235	1.84414	14.9478
tRF-1:29-Gly-CCC-2	GCGCCGCTGGTGTAGTGGTATCATGCAAG	tRF-5c	-	tRF-29-Q1Q89P9L84FS	29	tRNA-Gly-CCC-2-1,GCGCCGCTGGTGTAGTGGTATCATGCAAGATTCCCATTCTTGCGACCCGGGTTCGATTCCCGGGCGGCGCACCA,Gly-CCC,0	-1.18961	0.438421	0.20955	0.372418	4.66388	5.85349	168.526	10.7698	189.162	17.9032	6.70359	25.9267	16.5972	7.17494
tRF-+1:T15-Leu-AAG-2-4	GGGTTGCTGTCTTTT	tRF-1	1036	-	15	pre_tRNA-Leu-AAG-2-4,AAGCATTAAGTAGCTTTCTGGCATAAACATATTGCAGCTGGGTAGCGTGGCCGAGCGGTCTAAGGCGCTGGATTAAGGCTCCAGTCTCTTCGGGGGCGTGGGTTCGAATCCCACCGCTGCCAGGGTTGCTGTCTTTTTGTCCCCGCTGCATACACTCCTGGC,Leu-AAG,122	-1.17931	0.441564	0.170567	0.323252	3.35173	4.53104	55.2976	43.0792	39.083	14.7896	5.18005	4.12471	0.819617	29.2977
tRF-+1:T15-Leu-TAA-3	AAGAGGAGTTGTTTT	tRF-1	1032	-	15	pre_tRNA-Leu-TAA-3-1,TACCCGAGTTGCTTTAAAATAAAACATTGTTTTATCAGTTACCAGAATGGCCGAGTGGTTAAGGCGTTGGACTTAAGATCCAATGGATTCATATCCGCGTGGGTTCGAACCCCACTTCTGGTAAAGAGGAGTTGTTTTTCCTGGCAAAAACCTTTTTTCCTAA,Leu-TAA,123	-1.17767	0.442065	0.187833	0.346051	3.96348	5.14115	50.0312	37.6943	132.882	6.2272	6.09418	13.5526	1.84414	37.6685
tRF-+1:T14-Asp-GTC-2-9	GCCAAGTACGTTTT	tRF-1	-	-	14	pre_tRNA-Asp-GTC-2-9,ACCTTAAAACAGTCTCTTGAAGAACCTGTTTTATGGGCGGTCCTCGTTAGTATAGTGGTGAGTATCCCCGCCTGTCACGCGGGAGACCGGGGTTCGATTCCCCGACGGGGAGGCCAAGTACGTTTTTACCATTCTTCCGTATTTTTCCTTAC,Asp-GTC,112	-1.16	0.447511	0.317295	0.474199	1.58069	2.74069	1.31661	26.9245	15.6332	1.5568	1.52354	0	0	10.7624
tRF-68:85-Leu-TAG-2	ATCCCACCACTGCCACCA	tRF-3a	3010a	tRF-18-HR05X6D2	18	tRNA-Leu-TAG-2-1,GGTAGTGTGGCCGAGCGGTCTAAGGCGCTGGATTTAGGCTCCAGTCTCTTCGGGGGCGTGGGTTCGAATCCCACCACTGCCACCA,Leu-TAG,67	-1.15963	0.447628	0.164866	0.320851	3.97881	5.13844	61.8807	107.698	51.5896	18.6816	4.57063	17.0881	5.12261	23.9165
tRF-1:14-Ser-AGA-1-M7	GTAGTCGTGGCCGA	tRF-5a	5022a	-	14	tRNA-Ser-AGA-1-1,GTAGTCGTGGCCGAGTGGTTAAGGCGATGGACTAGAAATCCATTGGGGTTTCCCCGCGCAGGTTCGAATCCTGCCGACTACGCCA,Ser-AGA,0;tRNA-Ser-AGA-2-1,GTAGTCGTGGCCGAGTGGTTAAGGCGATGGACTAGAAATCCATTGGGGTCTCCCCGCGCAGGTTCGAATCCTGCCGACTACGCCA,Ser-AGA,0;tRNA-Ser-AGA-3-1,GTAGTCGTGGCCGAGTGGTTAAGGCGATGGACTAGAAATCCATTGGGGTTTCCCCACGCAGGTTCGAATCCTGCCGACTACGCCA,Ser-AGA,0;tRNA-Ser-AGA-4-1,GTAGTCGTGGCCGAGTGGTTAAGGTGATGGACTAGAAACCCAT…	-1.14536	0.452077	0.172958	0.325738	2.82171	3.96707	22.3824	24.232	29.7031	14.0112	1.52354	10.0171	1.63923	11.3603
tRF-1:23-chrM.Ser-GCT	GAGAAAGCTCACAAGAACTGCTA	tRF-5b	-	tRF-23-5BF900BYDO	23	chrM.tRNA12-SerGCT,GAGAAAGCTCACAAGAACTGCTAACTCATGCCCCCATGTCTAACAACATGGCTTTCTCACCA,Ser-GCT,0	-1.12914	0.457189	0.189103	0.346051	3.52159	4.65073	30.282	29.6169	71.9128	15.568	3.04709	12.6687	4.09808	16.1436
tRF-70:86-Leu-CAA-1-M5	TCCCACTTCTGACACCA	tRF-3a	-	tRF-17-86N7O52	17	tRNA-Leu-CAA-1-1,GTCAGGATGGCCGAGTGGTCTAAGGCGCCAGACTCAAGTTCTGGTCTCCAATGGAGGCGTGGGTTCGAATCCCACTTCTGACACCA,Leu-CAA,69;tRNA-Leu-CAA-2-1,GTCAGGATGGCCGAGTGGTCTAAGGCGCCAGACTCAAGTTCTGGTCTCCGTATGGAGGCGTGGGTTCGAATCCCACTTCTGACACCA,Leu-CAA,70;tRNA-Leu-CAA-3-1,GTCAGGATGGCCGAGTGGTCTAAGGCGCCAGACTCAAGTTCTGGTCTCCGCATGGAGGCGTGGGTTCGAATCCCACTTCTGACACCA,Leu-CAA,70;tRNA-Leu-CAA-4-1,GTCAGGATGGCCGAGTGGTCTAAGGCGCCAGACTC…	-1.12292	0.459163	0.170923	0.323252	3.72305	4.84598	36.8651	86.1584	45.3363	17.9032	10.9695	12.9634	3.07356	11.9582
tRF-+1:T19-Asp-GTC-1	GTGTGTAGCTGCACTTTTT	tRF-1	-	-	19	pre_tRNA-Asp-GTC-1-1,TCCTTGAAGGGCTGTCTGAGAAAATACACAGCCTAACGACTCCTCGTTAGTATAGTGGTTAGTATCCCCGCCTGTCACGCGGGAGACCGGGGTTCAATTCCCCGACGGGGAGGTGTGTAGCTGCACTTTTTTGGCGACAGTTATTATTTTCT,Asp-GTC,112	-1.09999	0.466519	0.281408	0.444529	2.14055	3.24055	10.5329	0	37.5197	4.6704	3.04709	3.53546	1.02452	5.97912
tiRNA-1:34-Val-CAC-1-M3	GTTTCCGTAGTGTAGTGGTTATCACGTTCGCCTC	tiRNA-5	-	tRF-34-79MP9P9NH57S15	34	tRNA-Val-CAC-1-1,GTTTCCGTAGTGTAGTGGTTATCACGTTCGCCTCACACGCGAAAGGTCCCCGGTTCGAAACCGGGCGGAAACACCA,Val-CAC,0;tRNA-Val-CAC-4-1,GTTTCCGTAGTGTAGTGGTTATCACGTTCGCCTCACACGCGAAAGGTCCCCGGTTCGAAACTGGGCGGAAACACCA,Val-CAC,0;tRNA-Val-CAC-5-1,GTTTCCGTAGTGTAGTGGTTATCACGTTCGCCTCACACGCGTAAAGGTCCCCGGTTCGAAACCGGGCGGAAACACCA,Val-CAC,0	-1.09275	0.468866	0.207549	0.372127	8.11218	9.20493	739.935	1591.24	443.983	650.743	46.3157	115.492	170.275	373.695
tRF-1:22-chrM.Ser-GCT	GAGAAAGCTCACAAGAACTGCT	tRF-5b	-	tRF-22-5BF900BY3	22	chrM.tRNA12-SerGCT,GAGAAAGCTCACAAGAACTGCTAACTCATGCCCCCATGTCTAACAACATGGCTTTCTCACCA,Ser-GCT,0	-1.07957	0.47317	0.196546	0.356783	7.48341	8.56298	768.901	393.098	873.896	269.327	40.831	162.042	48.5623	374.891
tRF-54:75-Ala-AGC-2-M2	TCAATCCCCGGCACCTCCACCA	tRF-3b	-	tRF-22-8EKSP1852	22	tRNA-Ala-AGC-2-1,GGGGGTGTAGCTCAGTGGTAGAGCGCGTGCTTAGCATGCACGAGGCCCCGGGTTCAATCCCCGGCACCTCCACCA,Ala-AGC,53;tRNA-Ala-AGC-3-1,GGGGGTGTAGCTCAGTGGTAGAGCGCGTGCTTAGCATGTACGAGGTCCCGGGTTCAATCCCCGGCACCTCCACCA,Ala-AGC,53	-1.06512	0.477932	0.210325	0.372418	3.46357	4.52869	106.645	59.2339	14.0699	7.784	4.26592	14.7311	1.02452	21.5248
tRF-1:23-Val-AAC-1-M7	GTTTCCGTAGTGTAGTGGTTATC	tRF-5b	5027b	tRF-23-79MP9P9NDD	23	tRNA-Val-AAC-1-1,GTTTCCGTAGTGTAGTGGTTATCACGTTCGCCTAACACGCGAAAGGTCCCCGGTTCGAAACCGGGCGGAAACACCA,Val-AAC,0;tRNA-Val-AAC-3-1,GTTTCCGTAGTGTAGTGGTTATCACGTTCGCCTAACACGCGAAAGGTCCCTGGATCAAAACCAGGCGGAAACACCA,Val-AAC,0;tRNA-Val-AAC-4-1,GTTTCCGTAGTGTAGTGGTTATCACGTTCGCCTAACACGCGAAAGGTCCGCGGTTCGAAACCGGGCGGAAACACCA,Val-AAC,0;tRNA-Val-AAC-5-1,GTTTCCGTAGTGTAGTGGTTATCACGTTTGCCTAACACGCGAAAGGTCCCCGGTTCGAAACCGGGCAGAA…	-1.06503	0.477963	0.212289	0.372418	6.99422	8.05925	300.187	759.271	303.284	242.083	134.681	60.6921	51.0212	46.0392
tRF-+1:T18-Asp-GTC-1	GTGTGTAGCTGCACTTTT	tRF-1	1004	-	18	pre_tRNA-Asp-GTC-1-1,TCCTTGAAGGGCTGTCTGAGAAAATACACAGCCTAACGACTCCTCGTTAGTATAGTGGTTAGTATCCCCGCCTGTCACGCGGGAGACCGGGGTTCAATTCCCCGACGGGGAGGTGTGTAGCTGCACTTTTTTGGCGACAGTTATTATTTTCT,Asp-GTC,112	-1.05365	0.481747	0.248858	0.412461	2.87806	3.93171	9.21627	5.3849	60.9695	7.784	3.65651	5.89244	1.84414	12.5562
tRF-28:41-Gln-CTG-1-M7	TGGACTCTGAATCC	tRF-2	-	-	14	tRNA-Gln-CTG-1-1,GGTTCCATGGTGTAATGGTTAGCACTCTGGACTCTGAATCCAGCGATCCGAGTTCAAATCTCGGTGGAACCTCCA,Gln-CTG,27;tRNA-Gln-CTG-2-1,GGTTCCATGGTGTAATGGTTAGCACTCTGGACTCTGAATCCAGCGATCCGAGTTCAAGTCTCGGTGGAACCTCCA,Gln-CTG,27;tRNA-Gln-CTG-3-1,GGTTCCATGGTGTAATGGTGAGCACTCTGGACTCTGAATCCAGCGATCCGAGTTCGAGTCTCGGTGGAACCTCCA,Gln-CTG,27;tRNA-Gln-CTG-4-1,GGTTCCATGGTGTAATGGTAAGCACTCTGGACTCTGAATCCAGCGATCCGAGTTCGAGTCTCGGTGGAAC…	-1.04817	0.483582	0.287316	0.446278	3.58875	4.63692	106.645	43.0792	15.6332	17.1248	0.609418	5.3032	0.204904	48.4309
tRF-55:76-Tyr-GTA-2-M2	TCGATTCCGGCTCGAAGGACCA	tRF-3b	3030b	tRF-22-WE884U1D2	22	tRNA-Tyr-GTA-2-1,CCTTCGATAGCTCAGTTGGTAGAGCGGAGGACTGTAGATCCTTAGGTCGCTGGTTCGATTCCGGCTCGAAGGACCA,Tyr-GTA,54;tRNA-Tyr-GTA-5-1,CCTTCGATAGCTCAGCTGGTAGAGCGGAGGACTGTAGATCCTTAGGTCGCTGGTTCGATTCCGGCTCGAAGGACCA,Tyr-GTA,54	-1.04198	0.485661	0.242196	0.406961	2.64835	3.69033	13.1661	53.849	7.8166	10.1192	1.82825	7.36555	1.63923	10.1645
tRF-69:86-Leu-CAG-1	ATCCCACTCCTGACACCA	tRF-3a	3011a	tRF-18-HRERXFD2	18	tRNA-Leu-CAG-1-1,GTCAGGATGGCCGAGCGGTCTAAGGCGCTGCGTTCAGGTCGCAGTCTCCCCTGGAGGCGTGGGTTCGAATCCCACTCCTGACACCA,Leu-CAG,68	-1.02722	0.490655	0.212528	0.372418	6.23018	7.2574	192.225	425.407	337.677	60.7152	44.7922	73.6555	13.3188	123.17
tRF-+1:T16-Asp-GTC-2-6	GAGGCTTAAACTTTTT	tRF-1	-	-	16	pre_tRNA-Asp-GTC-2-6,CTTCACAGGGATTTCCTAAGAGCTCCATTTTCACGTCAATTCCTCGTTAGTATAGTGGTGAGTATCCCCGCCTGTCACGCGGGAGACCGGGGTTCGATTCCCCGACGGGGAGGAGGCTTAAACTTTTTTTTAGAAAAGCACACTTCCGGTAA,Asp-GTC,112	-1.01889	0.493496	0.317881	0.474199	2.68355	3.70244	1.31661	24.232	53.1529	1.5568	2.74238	2.94622	0.614713	18.5353
tRF-+1:T15-Ser-AGA-2-5	GGAATGTCAGCTTTT	tRF-1	1030	-	15	pre_tRNA-Ser-AGA-2-5,GAGTCTACATGCACTCTCACCGCAAAAATTCACACAGCCAGTAGTCGTGGCCGAGTGGTTAAGGCGATGGACTAGAAATCCATTGGGGTCTCCCCGCGCAGGTTCGAATCCTGCCGACTACGGGAATGTCAGCTTTTTGCCGTCAACACTTACTTTTTGTGT,Ser-AGA,122	-1.01589	0.494522	0.264187	0.423448	3.91818	4.93407	30.282	48.4641	104.742	8.5624	9.14126	6.48169	1.22943	40.0601
tRF-69:86-Leu-TAA-1	ACCCCACTCCTGGTACCA	tRF-3a	3009a	tRF-18-0RER9LD2	18	tRNA-Leu-TAA-1-1,ACCAGGATGGCCGAGTGGTTAAGGCGTTGGACTTAAGATCCAATGGACATATGTCCGCGTGGGTTCGAACCCCACTCCTGGTACCA,Leu-TAA,68	-0.993271	0.502338	0.235215	0.401425	4.44981	5.44308	164.576	91.5433	56.2795	17.1248	6.70359	21.802	4.50789	45.4413
tRF-1:15-Ser-AGA-1-M7	GTAGTCGTGGCCGAG	tRF-5a	-	-	15	tRNA-Ser-AGA-1-1,GTAGTCGTGGCCGAGTGGTTAAGGCGATGGACTAGAAATCCATTGGGGTTTCCCCGCGCAGGTTCGAATCCTGCCGACTACGCCA,Ser-AGA,0;tRNA-Ser-AGA-2-1,GTAGTCGTGGCCGAGTGGTTAAGGCGATGGACTAGAAATCCATTGGGGTCTCCCCGCGCAGGTTCGAATCCTGCCGACTACGCCA,Ser-AGA,0;tRNA-Ser-AGA-3-1,GTAGTCGTGGCCGAGTGGTTAAGGCGATGGACTAGAAATCCATTGGGGTTTCCCCACGCAGGTTCGAATCCTGCCGACTACGCCA,Ser-AGA,0;tRNA-Ser-AGA-4-1,GTAGTCGTGGCCGAGTGGTTAAGGTGATGGACTAGAAACCCAT…	-0.992766	0.502513	0.23816	0.401673	4.13864	5.1314	94.796	51.1565	59.4062	24.1304	3.04709	30.9353	5.32751	18.5353
tRF-54:72-chrM.Val-TAC	AACTTGACCGCTCTGACCA	tRF-3b	-	tRF-19-BZOS4YE2	19	chrM.tRNA2-ValTAC,CAGAGTGTAGCTTAACACAAAGCACCCAACTTACACTTAGGAGATTTCAACTTAACTTGACCGCTCTGACCA,Val-TAC,53	-0.989914	0.503508	0.297694	0.456127	2.22317	3.21309	14.4827	16.1547	25.0131	3.892	0.304709	5.89244	0.204904	13.1541
tRF-57:74-Gly-CCC-1-M2	TTCCCGGCCAATGCACCA	tRF-3a	-	tRF-18-YR66IFD2	18	tRNA-Gly-CCC-1-1,GCATTGGTGGTTCAGTGGTAGAATTCTCGCCTCCCACGCGGGAGACCCGGGTTCAATTCCCGGCCAATGCACCA,Gly-CCC,56;tRNA-Gly-GCC-2-1,GCATTGGTGGTTCAGTGGTAGAATTCTCGCCTGCCACGCGGGAGGCCCGGGTTCGATTCCCGGCCAATGCACCA,Gly-GCC,56	-0.989486	0.503657	0.246955	0.411896	3.13456	4.12404	25.0156	59.2339	31.2664	6.2272	6.70359	10.0171	1.63923	8.96868
tiRNA-1:35-Leu-TAG-1	GGTAGCGTGGCCGAGCGGTCTAAGGCGCTGGATTT	tiRNA-5	-	-	35	tRNA-Leu-TAG-1-1,GGTAGCGTGGCCGAGCGGTCTAAGGCGCTGGATTTAGGCTCCAGTCTCTTCGGAGGCGTGGGTTCGAATCCCACCGCTGCCACCA,Leu-TAG,0	-0.978971	0.507341	0.373016	0.537314	1.63655	2.61552	10.5329	2.69245	25.0131	0.7784	1.52354	2.35698	1.22943	3.58747
tRF-1:28-Gly-CCC-2	GCGCCGCTGGTGTAGTGGTATCATGCAA	tRF-5c	-	tRF-28-Q1Q89P9L84DF	28	tRNA-Gly-CCC-2-1,GCGCCGCTGGTGTAGTGGTATCATGCAAGATTCCCATTCTTGCGACCCGGGTTCGATTCCCGGGCGGCGCACCA,Gly-CCC,0	-0.97868	0.507444	0.283318	0.444529	2.25336	3.23204	32.9153	8.07735	20.3232	3.892	2.43767	4.41933	2.25395	2.98956
tRF-1:15-Val-AAC-1-M9	GTTTCCGTAGTGTAG	tRF-5a	-	-	15	tRNA-Val-AAC-1-1,GTTTCCGTAGTGTAGTGGTTATCACGTTCGCCTAACACGCGAAAGGTCCCCGGTTCGAAACCGGGCGGAAACACCA,Val-AAC,0;tRNA-Val-AAC-2-1,GTTTCCGTAGTGTAGTGGTCATCACGTTCGCCTAACACGCGAAAGGTCCCCGGTTCGAAACCGGGCGGAAACACCA,Val-AAC,0;tRNA-Val-AAC-3-1,GTTTCCGTAGTGTAGTGGTTATCACGTTCGCCTAACACGCGAAAGGTCCCTGGATCAAAACCAGGCGGAAACACCA,Val-AAC,0;tRNA-Val-AAC-4-1,GTTTCCGTAGTGTAGTGGTTATCACGTTCGCCTAACACGCGAAAGGTCCGCGGTTCGAAACCGGGCGGAA…	-0.978663	0.50745	0.233019	0.401425	6.49476	7.47342	186.959	301.554	272.018	197.714	40.831	73.0663	32.3749	124.366
tRF-55:76-Val-TAC-1-M2	TCGAGCCCCAGTGGAACCACCA	tRF-3b	3017b	tRF-22-W0K672052	22	tRNA-Val-TAC-1-1,GGTTCCATAGTGTAGTGGTTATCACGTCTGCTTTACACGCAGAAGGTCCTGGGTTCGAGCCCCAGTGGAACCACCA,Val-TAC,54;tRNA-Val-TAC-2-1,GGTTCCATAGTGTAGCGGTTATCACGTCTGCTTTACACGCAGAAGGTCCTGGGTTCGAGCCCCAGTGGAACCACCA,Val-TAC,54	-0.970683	0.510264	0.258179	0.419774	4.51079	5.48147	143.511	134.622	50.0263	14.7896	4.57063	27.3999	3.89318	50.2246
tRF-68:85-Ser-GCT-3-M4	ATCCCATCCTCGTCGCCA	tRF-3a	-	tRF-18-HRH7MSD2	18	tRNA-Ser-GCT-3-1,GACGAGGTGGCCGAGTGGTTAAGGCGATGGACTGCTAATCCATTGTGCTTTGCACGCGTGGGTTCGAATCCCATCCTCGTCGCCA,Ser-GCT,67;tRNA-Ser-GCT-4-1,GACGAGGTGGCCGAGTGGTTAAGGCGATGGACTGCTAATCCATTGTGCTCTGCACGCGTGGGTTCGAATCCCATCCTCGTCGCCA,Ser-GCT,67;tRNA-Ser-GCT-5-1,GACGAGGTGGCCGAGTGGTTAAGGCGATGGACTGCTAATCCATTGTGCTCTGCACACGTGGGTTCGAATCCCATCCTCGTCGCCA,Ser-GCT,67;tRNA-Ser-GCT-6-1,GGAGAGGCCTGGCCGAGTGGTTAAGGCGATGGACTGCTAA…	-0.958314	0.514658	0.308765	0.466876	1.90844	2.86675	11.8495	32.3094	6.25328	3.1136	3.04709	4.71395	0.614713	2.98956
tRF-68:85-Leu-AAG-1-M6	ATCCCACCGCTGCCACCA	tRF-3a	3001a	tRF-18-HR0VX6D2	18	tRNA-Leu-AAG-1-1,GGTAGCGTGGCCGAGCGGTCTAAGGCGCTGGATTAAGGCTCCAGTCTCTTCGGAGGCGTGGGTTCGAATCCCACCGCTGCCACCA,Leu-AAG,67;tRNA-Leu-AAG-2-1,GGTAGCGTGGCCGAGCGGTCTAAGGCGCTGGATTAAGGCTCCAGTCTCTTCGGGGGCGTGGGTTCGAATCCCACCGCTGCCACCA,Leu-AAG,67;tRNA-Leu-AAG-3-1,GGTAGCGTGGCCGAGCGGTCTAAGGCGCTGGATTAAGGCTCCAGTCTCTTCGGGGGCGTGGGTTCAAATCCCACCGCTGCCACCA,Leu-AAG,67;tRNA-Leu-AAG-4-1,GGTAGCGTGGCCGAGTGGTCTAAGACGCTGGATTAAGGCT…	-0.950236	0.517548	0.249119	0.412461	8.83983	9.79006	2867.58	1908.95	1310.06	387.643	151.136	540.337	65.3644	965.628
tRF-1:15-chrM.Gln-TTG	TAGGATGGGGTGTGA	tRF-5a	-	-	15	chrM.tRNA22-GlnTTG,TAGGATGGGGTGTGATAGGTGGCACGGAGAATTTTGGATTCTCAGGGATGGGTTCGATTCTCATAGTCCTAGCCA,Gln-TTG,0	-0.94963	0.517765	0.396798	0.565781	1.71022	2.65985	3.94983	2.69245	23.4498	3.892	0.304709	3.83009	1.43433	4.18538
tRF-60:77-Thr-AGT-1-M2	ATCCCAGCGGTGCCTCCA	tRF-3a	-	tRF-18-HRF8X7D2	18	tRNA-Thr-AGT-1-1,GGCGCCGTGGCTTAGTTGGTTAAAGCGCCTGTCTAGTAAACAGGAGATCCTGGGTTCGAATCCCAGCGGTGCCTCCA,Thr-AGT,59;tRNA-Thr-AGT-5-1,GGCGCCGTGGCTTAGCTGGTTAAAGCGCCTGTCTAGTAAACAGGAGATCCTGGGTTCGAATCCCAGCGGTGCCTCCA,Thr-AGT,59	-0.946154	0.519014	0.309325	0.466876	2.32725	3.2734	7.89966	45.7716	6.25328	6.2272	4.87534	6.48169	0.204904	4.7833
tRF-1:16-Leu-AAG-4-M2	GGTAGCGTGGCCGAGT	tRF-5a	-	tRF-16-RPM830E	16	tRNA-Leu-AAG-4-1,GGTAGCGTGGCCGAGTGGTCTAAGACGCTGGATTAAGGCTCCAGTCTCTTCGGGGGCGTGGGTTTGAATCCCACCGCTGCCACCA,Leu-AAG,0;tRNA-Leu-TAG-3-1,GGTAGCGTGGCCGAGTGGTCTAAGGCGCTGGATTTAGGCTCCAGTCATTTCGATGGCGTGGGTTCGAATCCCACCGCTGCCACCA,Leu-TAG,0	-0.941918	0.52054	0.291919	0.450332	6.4382	7.38012	639.873	140.007	43.773	212.503	14.0166	124.92	47.128	40.658
tRF-+1:T19-Ala-CGC-2	AGGCGATCACGTAGATTTT	tRF-1	-	-	19	pre_tRNA-Ala-CGC-2-1,TAACATGACAGGAATTCTCCGTTACAACCGACTTGTGCCAGGGGATGTAGCTCAGTGGTAGAGCGCATGCTTCGCATGTATGAGGCCCCGGGTTCGATCCCCGGCATCTCCAAGGCGATCACGTAGATTTTGTTTAATTCAGCCTCTGGAAC,Ala-CGC,112	-0.941589	0.520659	0.445497	0.604699	2.11193	3.05351	64.5139	5.3849	6.25328	0	0.304709	0.294622	0.614713	16.7415
tRF-59:76-Thr-TGT-4-M3	ATCTCGCTGGGGCCTCCA	tRF-3a	-	tRF-18-H9Q867D2	18	tRNA-Thr-TGT-4-1,GGCTCCATAGCTCAGGGGTTAGAGCACTGGTCTTGTAAACCAGGGGTCGCGAGTTCAAATCTCGCTGGGGCCTCCA,Thr-TGT,58;tRNA-Thr-TGT-5-1,GGCCCTATAGCTCAGGGGTTAGAGCACTGGTCTTGTAAACCAGGGGTCGCGAGTTCAAATCTCGCTGGGGCCTCCA,Thr-TGT,58;tRNA-Thr-TGT-6-1,GGCTCCATAGCTCAGGGGTTAGAGCACTGGTCTTGTAAACCAGGGTCGCGAGTTCAAATCTCGCTGGGGCCTCCA,Thr-TGT,57	-0.928016	0.525581	0.329099	0.487714	2.17483	3.10284	36.8651	16.1547	6.25328	4.6704	1.82825	3.53546	1.02452	8.96868
tRF-1:24-chrM.Ser-GCT	GAGAAAGCTCACAAGAACTGCTAA	tRF-5b	-	tRF-24-5BF900BYHF	24	chrM.tRNA12-SerGCT,GAGAAAGCTCACAAGAACTGCTAACTCATGCCCCCATGTCTAACAACATGGCTTTCTCACCA,Ser-GCT,0	-0.924401	0.526899	0.293246	0.450841	4.0068	4.9312	34.2319	29.6169	98.4892	16.3464	1.82825	16.4988	5.12261	31.6893
tRF-1:16-Leu-AAG-1-M4	GGTAGCGTGGCCGAGC	tRF-5a	5019a	tRF-16-RPM830D	16	tRNA-Leu-AAG-1-1,GGTAGCGTGGCCGAGCGGTCTAAGGCGCTGGATTAAGGCTCCAGTCTCTTCGGAGGCGTGGGTTCGAATCCCACCGCTGCCACCA,Leu-AAG,0;tRNA-Leu-AAG-2-1,GGTAGCGTGGCCGAGCGGTCTAAGGCGCTGGATTAAGGCTCCAGTCTCTTCGGGGGCGTGGGTTCGAATCCCACCGCTGCCACCA,Leu-AAG,0;tRNA-Leu-AAG-3-1,GGTAGCGTGGCCGAGCGGTCTAAGGCGCTGGATTAAGGCTCCAGTCTCTTCGGGGGCGTGGGTTCAAATCCCACCGCTGCCACCA,Leu-AAG,0;tRNA-Leu-TAG-1-1,GGTAGCGTGGCCGAGCGGTCTAAGGCGCTGGATTTAGGCTCCA…	-0.919648	0.528638	0.304167	0.462908	6.83553	7.75518	695.17	255.783	68.7861	280.224	18.5872	152.909	70.0772	33.4831
tRF-1:14-Val-AAC-1-M9	GTTTCCGTAGTGTA	tRF-5a	-	-	14	tRNA-Val-AAC-1-1,GTTTCCGTAGTGTAGTGGTTATCACGTTCGCCTAACACGCGAAAGGTCCCCGGTTCGAAACCGGGCGGAAACACCA,Val-AAC,0;tRNA-Val-AAC-2-1,GTTTCCGTAGTGTAGTGGTCATCACGTTCGCCTAACACGCGAAAGGTCCCCGGTTCGAAACCGGGCGGAAACACCA,Val-AAC,0;tRNA-Val-AAC-3-1,GTTTCCGTAGTGTAGTGGTTATCACGTTCGCCTAACACGCGAAAGGTCCCTGGATCAAAACCAGGCGGAAACACCA,Val-AAC,0;tRNA-Val-AAC-4-1,GTTTCCGTAGTGTAGTGGTTATCACGTTCGCCTAACACGCGAAAGGTCCGCGGTTCGAAACCGGGCGGAA…	-0.911347	0.531688	0.282552	0.444529	4.36901	5.28036	68.4638	32.3094	46.8996	52.9312	8.53185	12.9634	7.37655	34.6789
tRF-70:86-Leu-CAG-1	TCCCACTCCTGACACCA	tRF-3a	-	tRF-17-8647O52	17	tRNA-Leu-CAG-1-1,GTCAGGATGGCCGAGCGGTCTAAGGCGCTGCGTTCAGGTCGCAGTCTCCCCTGGAGGCGTGGGTTCGAATCCCACTCCTGACACCA,Leu-CAG,69	-0.898324	0.53651	0.280455	0.444529	3.17355	4.07188	22.3824	53.849	31.2664	7.0056	6.09418	8.83866	1.84414	11.9582
tRF-58:75-Gly-TCC-1-M3	TTCCCGGCCAACGCACCA	tRF-3a	3026a	tRF-18-YR66EFD2	18	tRNA-Gly-TCC-1-1,GCGTTGGTGGTATAGTGGTTAGCATAGCTGCCTTCCAAGCAGTTGACCCGGGTTCGATTCCCGGCCAACGCACCA,Gly-TCC,57;tRNA-Gly-TCC-2-1,GCGTTGGTGGTATAGTGGTGAGCATAGCTGCCTTCCAAGCAGTTGACCCGGGTTCGATTCCCGGCCAACGCACCA,Gly-TCC,57;tRNA-Gly-TCC-3-1,GCGTTGGTGGTATAGTGGTAAGCATAGCTGCCTTCCAAGCAGTTGACCCGGGTTCGATTCCCGGCCAACGCACCA,Gly-TCC,57	-0.889448	0.539821	0.363228	0.52961	2.29029	3.17974	28.9654	32.3094	7.8166	2.3352	1.21884	7.66017	0.204904	10.1645
tRF-59:76-Val-TAC-1-M3	GCCCCAGTGGAACCACCA	tRF-3a	-	tRF-18-PR18B6D2	18	tRNA-Val-TAC-1-1,GGTTCCATAGTGTAGTGGTTATCACGTCTGCTTTACACGCAGAAGGTCCTGGGTTCGAGCCCCAGTGGAACCACCA,Val-TAC,58;tRNA-Val-TAC-2-1,GGTTCCATAGTGTAGCGGTTATCACGTCTGCTTTACACGCAGAAGGTCCTGGGTTCGAGCCCCAGTGGAACCACCA,Val-TAC,58;tRNA-Val-TAC-3-1,GGTTCCATAGTGTAGTGGTTATCACATCTGCTTTACACGCAGAAGGTCCTGGGTTCAAGCCCCAGTGGAACCACCA,Val-TAC,58	-0.879155	0.543686	0.369794	0.537314	2.03272	2.91188	1.31661	26.9245	15.6332	3.892	3.04709	7.66017	0.409808	1.79374
tRF-1:16-Ser-TGA-1	GCAGCGATGGCCGAGT	tRF-5a	-	-	16	tRNA-Ser-TGA-1-1,GCAGCGATGGCCGAGTGGTTAAGGCGTTGGACTTGAAATCCAATGGGGTCTCCCCGCGCAGGTTCGAACCCTGCTCGCTGCGCCA,Ser-TGA,0	-0.867817	0.547975	0.344247	0.505194	4.30984	5.17766	89.5295	26.9245	17.1965	56.0448	3.04709	30.6407	10.4501	8.37077
tRF-+1:T14-Lys-TTT-3-2	TCTTGTTCTCTTTT	tRF-1	-	-	14	pre_tRNA-Lys-TTT-3-2,CTTATGTAAGAAACGGCAGAACAAGCTGTTGTCTACGGGAGCCCGGATAGCTCAGTCGGTAGAGCATCAGACTTTTAATCTGAGGGTCCAGGGTTCAAGTCCCTGTTCGGGCGTCTTGTTCTCTTTTCCTCAATGAACAAATACAAATTGTAC,Lys-TTT,113	-0.862672	0.549933	0.409494	0.571269	1.7994	2.66208	3.94983	5.3849	25.0131	2.3352	1.52354	0.883866	1.22943	7.17494
tRF-+1:T16-Glu-CTC-1-6	TGAGGTTTTTCTGTTT	tRF-1	-	-	16	pre_tRNA-Glu-CTC-1-6,TCTCGCTTCATAAATATGTTTTAATAAACCTACTTCAGCTTCCCTGGTGGTCTAGTGGTTAGGATTCGGCGCTCTCACCGCCGCGGCCCGGGTTCGATTCCCGGTCAGGGAATGAGGTTTTTCTGTTTTAACCTCCAAATTCTTTCATCCAG,Glu-CTC,112	-0.827646	0.563448	0.415579	0.577975	3.02162	3.84926	38.1817	0	50.0263	4.6704	3.65651	4.12471	0.614713	23.3186
tRF-+1:T14-Lys-CTT-2-2	GCAACTGGTCGTTT	tRF-1	-	-	14	pre_tRNA-Lys-CTT-2-2,TGATCTAGAATGAAAAATTGTTGAGATACGGTCATCGGGCGCCCGGCTAGCTCAGTCGGTAGAGCATGAGACTCTTAATCTCAGGGTCGTGGGTTCGAGCCCCACGTTGGGCGGCAACTGGTCGTTTTAGTCCTAAATCTACGACTACTAGCC,Lys-CTT,113	-0.811802	0.56967	0.324117	0.481911	6.87911	7.69091	375.234	312.324	587.809	75.5048	71.3019	81.6103	38.9318	155.457
tRF-59:76-Val-AAC-1-M5	AACCGGGCGGAAACACCA	tRF-3a	-	tRF-18-BS68BFD2	18	tRNA-Val-AAC-1-1,GTTTCCGTAGTGTAGTGGTTATCACGTTCGCCTAACACGCGAAAGGTCCCCGGTTCGAAACCGGGCGGAAACACCA,Val-AAC,58;tRNA-Val-AAC-2-1,GTTTCCGTAGTGTAGTGGTCATCACGTTCGCCTAACACGCGAAAGGTCCCCGGTTCGAAACCGGGCGGAAACACCA,Val-AAC,58;tRNA-Val-AAC-4-1,GTTTCCGTAGTGTAGTGGTTATCACGTTCGCCTAACACGCGAAAGGTCCGCGGTTCGAAACCGGGCGGAAACACCA,Val-AAC,58;tRNA-Val-CAC-1-1,GTTTCCGTAGTGTAGTGGTTATCACGTTCGCCTCACACGCGAAAGGTCCCCGGTTCGAAACCGGGCG…	-0.77269	0.585325	0.356883	0.522042	5.36724	6.13993	201.441	210.011	106.306	17.9032	30.7756	35.3546	7.17165	61.5849
tRF-59:76-Arg-TCT-1	GTCCCGGCGGAGTCGCCA	tRF-3a	-	-	18	tRNA-Arg-TCT-1-1,GGCTCCGTGGCGCAATGGATAGCGCATTGGACTTCTAATTCAAAGGTTCCGGGTTCGAGTCCCGGCGGAGTCGCCA,Arg-TCT,58	-0.77127	0.585902	0.407013	0.569566	2.42989	3.20116	32.9153	10.7698	14.0699	5.4488	3.3518	4.41933	0.409808	11.3603
tRF-1:15-Ser-GCT-1-M5	GACGAGGTGGCCGAG	tRF-5a	-	-	15	tRNA-Ser-GCT-1-1,GACGAGGTGGCCGAGTGGTTAAGGCGATGGACTGCTAATCCATTGTGCTCTGCACGCGTGGGTTCGAATCCCACCCTCGTCGCCA,Ser-GCT,0;tRNA-Ser-GCT-2-1,GACGAGGTGGCCGAGTGGTTAAGGCGATGGACTGCTAATCCATTGTGCTCTGCACGCGTGGGTTCGAATCCCACCTTCGTCGCCA,Ser-GCT,0;tRNA-Ser-GCT-3-1,GACGAGGTGGCCGAGTGGTTAAGGCGATGGACTGCTAATCCATTGTGCTTTGCACGCGTGGGTTCGAATCCCATCCTCGTCGCCA,Ser-GCT,0;tRNA-Ser-GCT-4-1,GACGAGGTGGCCGAGTGGTTAAGGCGATGGACTGCTAATCCAT…	-0.766185	0.58797	0.41808	0.579669	4.19768	4.96386	190.909	32.3094	39.083	4.6704	0.609418	28.873	7.99126	18.5353
tRF-54:75-Ala-CGC-1-M4	TCGATCCCCGGCATCTCCACCA	tRF-3b	3021b	tRF-22-WEKSPM852	22	tRNA-Ala-CGC-1-1,GGGGATGTAGCTCAGTGGTAGAGCGCATGCTTCGCATGTATGAGGTCCCGGGTTCGATCCCCGGCATCTCCACCA,Ala-CGC,53;tRNA-Ala-CGC-2-1,GGGGATGTAGCTCAGTGGTAGAGCGCATGCTTCGCATGTATGAGGCCCCGGGTTCGATCCCCGGCATCTCCACCA,Ala-CGC,53;tRNA-Ala-TGC-2-1,GGGGATGTAGCTCAGTGGTAGAGCGCATGCTTTGCATGTATGAGGTCCCGGGTTCGATCCCCGGCATCTCCACCA,Ala-TGC,53;tRNA-Ala-TGC-3-1,GGGGATGTAGCTCAGTGGTAGAGCGCATGCTTTGCATGTATGAGGCCCCGGGTTCGATCCCCGGCATCTC…	-0.751922	0.593812	0.406602	0.569566	4.67551	5.42743	184.325	153.47	18.7598	8.5624	6.09418	22.9805	2.66375	70.5536
tRF-+1:T18-Glu-TTC-2-2	TGACTGGACCTTTCTTTT	tRF-1	-	-	18	pre_tRNA-Glu-TTC-2-2,ATGATTCAATTGGTTTAGAATTCAACGGTTACTTGTCATCTCCCACATGGTCTAGCGGTTAGGATTCCTGGTTTTCACCCAGGCGGCCCGGGTTCGACTCCCGGTGTGGGAATGACTGGACCTTTCTTTTGGAACACAGTGAAACTCGTAAA,Glu-TTC,112	-0.734779	0.60091	0.402595	0.569566	5.95874	6.69352	310.72	121.16	282.961	23.352	31.6897	32.4084	4.30299	174.59
tRF-54:75-Pro-AGG-1-M7	TCAAATCCCGGACGAGCCCCCA	tRF-3b	3002b	tRF-22-8B8SOUPR2	22	tRNA-Pro-AGG-1-1,GGCTCGTTGGTCTAGGGGTATGATTCTCGCTTAGGATGCGAGAGGTCCCGGGTTCAAATCCCGGACGAGCCCCCA,Pro-AGG,53;tRNA-Pro-AGG-2-1,GGCTCGTTGGTCTAGGGGTATGATTCTCGCTTAGGGTGCGAGAGGTCCCGGGTTCAAATCCCGGACGAGCCCCCA,Pro-AGG,53;tRNA-Pro-CGG-1-1,GGCTCGTTGGTCTAGGGGTATGATTCTCGCTTCGGGTGCGAGAGGTCCCGGGTTCAAATCCCGGACGAGCCCCCA,Pro-CGG,53;tRNA-Pro-CGG-2-1,GGCTCGTTGGTCTAGGGGTATGATTCTCGCTTCGGGTGTGAGAGGTCCCGGGTTCAAATCCCGGACGAGC…	-0.718556	0.607705	0.455371	0.612582	2.09629	2.81484	21.0658	21.5396	3.12664	4.6704	0.609418	2.06235	0.614713	13.752
tRF-53:74-Gly-GCC-2	TCGATTCCCGGCCAATGCACCA	tRF-3b	3027b	tRF-22-WE8SPOX52	22	tRNA-Gly-GCC-2-1,GCATTGGTGGTTCAGTGGTAGAATTCTCGCCTGCCACGCGGGAGGCCCGGGTTCGATTCCCGGCCAATGCACCA,Gly-GCC,52	-0.70173	0.614835	0.404835	0.569566	4.82351	5.52524	55.2976	140.007	60.9695	34.2496	7.31301	40.0686	6.14713	46.6371
tRF-+1:T14-Leu-TAA-3	AAGAGGAGTTGTTT	tRF-1	-	-	14	pre_tRNA-Leu-TAA-3-1,TACCCGAGTTGCTTTAAAATAAAACATTGTTTTATCAGTTACCAGAATGGCCGAGTGGTTAAGGCGTTGGACTTAAGATCCAATGGATTCATATCCGCGTGGGTTCGAACCCCACTTCTGGTAAAGAGGAGTTGTTTTTCCTGGCAAAAACCTTTTTTCCTAA,Leu-TAA,123	-0.696036	0.617266	0.478799	0.630954	3.35099	4.04703	7.89966	13.4622	76.6027	1.5568	1.82825	8.54404	1.63923	27.504
tRF-1:32-Gly-TCC-1	GCGTTGGTGGTATAGTGGTTAGCATAGCTGCC	tRF-5c	-	tRF-32-QNR8VP9NFQFYJ	32	tRNA-Gly-TCC-1-1,GCGTTGGTGGTATAGTGGTTAGCATAGCTGCCTTCCAAGCAGTTGACCCGGGTTCGATTCCCGGCCAACGCACCA,Gly-TCC,0	-0.67953	0.624369	0.452734	0.612582	8.74755	9.42708	1274.48	1044.67	343.931	997.909	143.518	246.893	335.633	57.3995
tRF-+1:T17-Glu-TTC-2-2	TGACTGGACCTTTCTTT	tRF-1	-	-	17	pre_tRNA-Glu-TTC-2-2,ATGATTCAATTGGTTTAGAATTCAACGGTTACTTGTCATCTCCCACATGGTCTAGCGGTTAGGATTCCTGGTTTTCACCCAGGCGGCCCGGGTTCGACTCCCGGTGTGGGAATGACTGGACCTTTCTTTTGGAACACAGTGAAACTCGTAAA,Glu-TTC,112	-0.677217	0.625371	0.445313	0.604699	8.41646	9.09368	1786.64	527.72	1419.5	158.794	126.149	189.737	15.7776	1078.63
tRF-1:14-Ser-GCT-1-M5	GACGAGGTGGCCGA	tRF-5a	-	-	14	tRNA-Ser-GCT-1-1,GACGAGGTGGCCGAGTGGTTAAGGCGATGGACTGCTAATCCATTGTGCTCTGCACGCGTGGGTTCGAATCCCACCCTCGTCGCCA,Ser-GCT,0;tRNA-Ser-GCT-2-1,GACGAGGTGGCCGAGTGGTTAAGGCGATGGACTGCTAATCCATTGTGCTCTGCACGCGTGGGTTCGAATCCCACCTTCGTCGCCA,Ser-GCT,0;tRNA-Ser-GCT-3-1,GACGAGGTGGCCGAGTGGTTAAGGCGATGGACTGCTAATCCATTGTGCTTTGCACGCGTGGGTTCGAATCCCATCCTCGTCGCCA,Ser-GCT,0;tRNA-Ser-GCT-4-1,GACGAGGTGGCCGAGTGGTTAAGGCGATGGACTGCTAATCCAT…	-0.671946	0.62766	0.464362	0.620981	3.97686	4.6488	154.043	24.232	28.1398	5.4488	1.52354	25.0429	1.84414	34.081
tiRNA-1:34-Val-CAC-3	GTTTCCGTAGTGTAGCGGTTATCACATTCGCCTC	tiRNA-5	-	tRF-34-79MP9PMNH5IS15	34	tRNA-Val-CAC-3-1,GTTTCCGTAGTGTAGCGGTTATCACATTCGCCTCACACGCGAAAGGTCCCCGGTTCGATCCCGGGCGGAAACACCA,Val-CAC,0	-0.67048	0.628298	0.430659	0.592826	7.96384	8.63432	1019.06	1157.75	470.56	199.27	41.4404	85.4404	88.1088	633.787
tRF-1:32-chrM.Tyr-GTA	GGTAAAATGGCTGAGTGAAGCATTGGACTGTA	tRF-5c	-	tRF-32-ROD8N0X0JYOYO	32	chrM.tRNA18-TyrGTA,GGTAAAATGGCTGAGTGAAGCATTGGACTGTAAATCTAAAGACAGGGGTTAGGCCTCTTTTTACCACCA,Tyr-GTA,0	-0.64502	0.639484	0.477056	0.630495	5.07524	5.72026	48.7146	59.2339	35.9564	91.0728	7.61772	14.4365	9.22069	89.0889
tRF-69:86-Leu-CAA-1-M5	ATCCCACTTCTGACACCA	tRF-3a	3012a	tRF-18-HRE9XFD2	18	tRNA-Leu-CAA-1-1,GTCAGGATGGCCGAGTGGTCTAAGGCGCCAGACTCAAGTTCTGGTCTCCAATGGAGGCGTGGGTTCGAATCCCACTTCTGACACCA,Leu-CAA,68;tRNA-Leu-CAA-2-1,GTCAGGATGGCCGAGTGGTCTAAGGCGCCAGACTCAAGTTCTGGTCTCCGTATGGAGGCGTGGGTTCGAATCCCACTTCTGACACCA,Leu-CAA,69;tRNA-Leu-CAA-3-1,GTCAGGATGGCCGAGTGGTCTAAGGCGCCAGACTCAAGTTCTGGTCTCCGCATGGAGGCGTGGGTTCGAATCCCACTTCTGACACCA,Leu-CAA,69;tRNA-Leu-CAA-4-1,GTCAGGATGGCCGAGTGGTCTAAGGCGCCAGACTC…	-0.642737	0.640497	0.43167	0.592826	7.15528	7.79802	280.438	673.112	318.917	151.01	100.249	202.7	21.31	146.488
tiRNA-1:34-Val-AAC-1-M3	GTTTCCGTAGTGTAGTGGTTATCACGTTCGCCTA	tiRNA-5	-	tRF-34-79MP9P9NH57S1O	34	tRNA-Val-AAC-1-1,GTTTCCGTAGTGTAGTGGTTATCACGTTCGCCTAACACGCGAAAGGTCCCCGGTTCGAAACCGGGCGGAAACACCA,Val-AAC,0;tRNA-Val-AAC-3-1,GTTTCCGTAGTGTAGTGGTTATCACGTTCGCCTAACACGCGAAAGGTCCCTGGATCAAAACCAGGCGGAAACACCA,Val-AAC,0;tRNA-Val-AAC-4-1,GTTTCCGTAGTGTAGTGGTTATCACGTTCGCCTAACACGCGAAAGGTCCGCGGTTCGAAACCGGGCGGAAACACCA,Val-AAC,0	-0.620314	0.650529	0.470934	0.626066	6.92629	7.54661	367.334	358.096	109.432	234.298	17.0637	59.219	63.9301	206.878
tRF-60:76-Arg-ACG-1-M2	TCCTGGCTGGCTCGCCA	tRF-3a	-	tRF-17-8YQ84V2	17	tRNA-Arg-ACG-1-1,GGGCCAGTGGCGCAATGGATAACGCGTCTGACTACGGATCAGAAGATTCCAGGTTCGACTCCTGGCTGGCTCGCCA,Arg-ACG,59;tRNA-Arg-ACG-2-1,GGGCCAGTGGCGCAATGGATAACGCGTCTGACTACGGATCAGAAGATTCTAGGTTCGACTCCTGGCTGGCTCGCCA,Arg-ACG,59	-0.619964	0.650687	0.46287	0.620823	3.57386	4.19383	18.4325	24.232	45.3363	14.7896	6.39888	17.3827	1.22943	17.3394
tRF-59:75-Gly-TCC-1-M3	TCCCGGCCAACGCACCA	tRF-3a	-	tRF-17-8SPOL52	17	tRNA-Gly-TCC-1-1,GCGTTGGTGGTATAGTGGTTAGCATAGCTGCCTTCCAAGCAGTTGACCCGGGTTCGATTCCCGGCCAACGCACCA,Gly-TCC,58;tRNA-Gly-TCC-2-1,GCGTTGGTGGTATAGTGGTGAGCATAGCTGCCTTCCAAGCAGTTGACCCGGGTTCGATTCCCGGCCAACGCACCA,Gly-TCC,58;tRNA-Gly-TCC-3-1,GCGTTGGTGGTATAGTGGTAAGCATAGCTGCCTTCCAAGCAGTTGACCCGGGTTCGATTCCCGGCCAACGCACCA,Gly-TCC,58	-0.618583	0.65131	0.518393	0.673315	2.56014	3.17873	23.699	29.6169	9.37992	3.892	1.82825	9.42791	0.409808	10.7624
tRF-65:86-Leu-CAG-1	TCGAATCCCACTCCTGACACCA	tRF-3b	3011b	tRF-22-WB8647O52	22	tRNA-Leu-CAG-1-1,GTCAGGATGGCCGAGCGGTCTAAGGCGCTGCGTTCAGGTCGCAGTCTCCCCTGGAGGCGTGGGTTCGAATCCCACTCCTGACACCA,Leu-CAG,64	-0.605746	0.657132	0.538843	0.689963	2.97694	3.58269	35.5485	29.6169	10.9432	7.784	0.609418	3.53546	0.409808	29.8956
tRF-58:74-Gly-CCC-1-M2	TCCCGGCCAATGCACCA	tRF-3a	3027a	tRF-17-8SPOX52	17	tRNA-Gly-CCC-1-1,GCATTGGTGGTTCAGTGGTAGAATTCTCGCCTCCCACGCGGGAGACCCGGGTTCAATTCCCGGCCAATGCACCA,Gly-CCC,57;tRNA-Gly-GCC-2-1,GCATTGGTGGTTCAGTGGTAGAATTCTCGCCTGCCACGCGGGAGGCCCGGGTTCGATTCCCGGCCAATGCACCA,Gly-GCC,57	-0.598346	0.660511	0.489316	0.641075	3.93332	4.53166	15.7993	45.7716	59.4062	14.7896	17.0637	12.0795	3.27847	9.56659
tRF-1:16-Val-AAC-1-M8	GTTTCCGTAGTGTAGT	tRF-5a	-	tRF-16-79MP9PE	16	tRNA-Val-AAC-1-1,GTTTCCGTAGTGTAGTGGTTATCACGTTCGCCTAACACGCGAAAGGTCCCCGGTTCGAAACCGGGCGGAAACACCA,Val-AAC,0;tRNA-Val-AAC-2-1,GTTTCCGTAGTGTAGTGGTCATCACGTTCGCCTAACACGCGAAAGGTCCCCGGTTCGAAACCGGGCGGAAACACCA,Val-AAC,0;tRNA-Val-AAC-3-1,GTTTCCGTAGTGTAGTGGTTATCACGTTCGCCTAACACGCGAAAGGTCCCTGGATCAAAACCAGGCGGAAACACCA,Val-AAC,0;tRNA-Val-AAC-4-1,GTTTCCGTAGTGTAGTGGTTATCACGTTCGCCTAACACGCGAAAGGTCCGCGGTTCGAAACCGGGCGGAA…	-0.590146	0.664276	0.544825	0.695652	4.29468	4.88482	50.0312	5.3849	9.37992	59.1584	3.65651	15.0257	11.4746	20.329
tRF-28:41-Gln-TTG-1-M3	TGGACTTTGAATCC	tRF-2	-	-	14	tRNA-Gln-TTG-1-1,GGTCCCATGGTGTAATGGTTAGCACTCTGGACTTTGAATCCAGCGATCCGAGTTCAAATCTCGGTGGGACCTCCA,Gln-TTG,27;tRNA-Gln-TTG-2-1,GGTCCCATGGTGTAATGGTTAGCACTCTGGACTTTGAATCCAGCAATCCGAGTTCGAATCTCGGTGGGACCTCCA,Gln-TTG,27;tRNA-Gln-TTG-3-1,GGCCCCATGGTGTAATGGTTAGCACTCTGGACTTTGAATCCAGCGATCCGAGTTCAAATCTCGGTGGGACCTCCA,Gln-TTG,27	-0.585186	0.666563	0.649691	0.793677	2.44648	3.03167	68.4638	8.07735	1.56332	0	0	2.6516	0.204904	21.5248
tRF-58:75-Gln-TTG-1-M3	ATCTCGGTGGGACCTCCA	tRF-3a	-	tRF-18-H9R8O7D2	18	tRNA-Gln-TTG-1-1,GGTCCCATGGTGTAATGGTTAGCACTCTGGACTTTGAATCCAGCGATCCGAGTTCAAATCTCGGTGGGACCTCCA,Gln-TTG,57;tRNA-Gln-TTG-2-1,GGTCCCATGGTGTAATGGTTAGCACTCTGGACTTTGAATCCAGCAATCCGAGTTCGAATCTCGGTGGGACCTCCA,Gln-TTG,57;tRNA-Gln-TTG-3-1,GGCCCCATGGTGTAATGGTTAGCACTCTGGACTTTGAATCCAGCGATCCGAGTTCAAATCTCGGTGGGACCTCCA,Gln-TTG,57	-0.572662	0.672375	0.497298	0.649649	5.22757	5.80024	119.812	137.315	68.7861	40.4768	26.205	32.9977	3.27847	71.7494
tRF-60:76-Arg-TCT-1	TCCCGGCGGAGTCGCCA	tRF-3a	-	-	17	tRNA-Arg-TCT-1-1,GGCTCCGTGGCGCAATGGATAGCGCATTGGACTTCTAATTCAAAGGTTCCGGGTTCGAGTCCCGGCGGAGTCGCCA,Arg-TCT,59	-0.56594	0.675515	0.571744	0.721867	2.34432	2.91026	30.282	8.07735	9.37992	4.6704	1.52354	10.3118	0.204904	7.17494
tRF-+1:T15-Lys-CTT-2-2	GCAACTGGTCGTTTT	tRF-1	1024	-	15	pre_tRNA-Lys-CTT-2-2,TGATCTAGAATGAAAAATTGTTGAGATACGGTCATCGGGCGCCCGGCTAGCTCAGTCGGTAGAGCATGAGACTCTTAATCTCAGGGTCGTGGGTTCGAGCCCCACGTTGGGCGGCAACTGGTCGTTTTAGTCCTAAATCTACGACTACTAGCC,Lys-CTT,113	-0.532803	0.691211	0.531808	0.684835	5.34206	5.87486	113.229	67.3112	170.402	24.9088	31.6897	19.7397	12.909	50.8225
tRF-59:76-Phe-GAA-1-M4	TCCCGGGTTTCGGCACCA	tRF-3a	-	tRF-18-8SRZMFD2	18	tRNA-Phe-GAA-1-1,GCCGAAATAGCTCAGTTGGGAGAGCGTTAGACTGAAGATCTAAAGGTCCCTGGTTCGATCCCGGGTTTCGGCACCA,Phe-GAA,58;tRNA-Phe-GAA-2-1,GCCGAAATAGCTCAGTTGGGAGAGCGTTAGACTGAAGATCTAAAGGTCCCTGGTTCAATCCCGGGTTTCGGCACCA,Phe-GAA,58;tRNA-Phe-GAA-3-1,GCCGAGATAGCTCAGTTGGGAGAGCGTTAGACTGAAGATCTAAAGGTCCCTGGTTCAATCCCGGGTTTCGGCACCA,Phe-GAA,58;tRNA-Phe-GAA-4-1,GCCGAAATAGCTCAGTTGGGAGAGCGTTAGACCGAAGATCTTAAAGGTCCCTGGTTCAATCCCGGGT…	-0.484311	0.714839	0.556146	0.706118	3.17389	3.6582	23.699	24.232	23.4498	8.5624	6.09418	12.3741	1.22943	10.1645
tRF-59:76-Tyr-GTA-2-M3	TTCCGGCTCGAAGGACCA	tRF-3a	3030a	tRF-18-YSQSD2D2	18	tRNA-Tyr-GTA-2-1,CCTTCGATAGCTCAGTTGGTAGAGCGGAGGACTGTAGATCCTTAGGTCGCTGGTTCGATTCCGGCTCGAAGGACCA,Tyr-GTA,58;tRNA-Tyr-GTA-5-1,CCTTCGATAGCTCAGCTGGTAGAGCGGAGGACTGTAGATCCTTAGGTCGCTGGTTCGATTCCGGCTCGAAGGACCA,Tyr-GTA,58;tRNA-Tyr-GTA-7-1,CCTTCGATAGCTCAGCTGGTAGAGCGGAGGACTGTAGATCCTTAGGTCGCTGGTTCAATTCCGGCTCGAAGGACCA,Tyr-GTA,58	-0.466246	0.723846	0.570648	0.721867	6.65479	7.12103	156.677	490.026	157.895	96.5216	84.0996	133.169	13.5237	94.4701
tRF-1:15-Lys-CTT-1-M5	GCCCGGCTAGCTCAG	tRF-5a	5005a	-	15	tRNA-Lys-CTT-1-1,GCCCGGCTAGCTCAGTCGGTAGAGCATGGGACTCTTAATCCCAGGGTCGTGGGTTCGAGCCCCACGTTGGGCGCCA,Lys-CTT,0;tRNA-Lys-CTT-2-1,GCCCGGCTAGCTCAGTCGGTAGAGCATGAGACTCTTAATCTCAGGGTCGTGGGTTCGAGCCCCACGTTGGGCGCCA,Lys-CTT,0;tRNA-Lys-CTT-3-1,GCCCGGCTAGCTCAGTCGGTAGAGCATGAGACCCTTAATCTCAGGGTCGTGGGTTCGAGCCCCACGTTGGGCGCCA,Lys-CTT,0;tRNA-Lys-CTT-4-1,GCCCGGCTAGCTCAGTCGGTAGAGCATGGGACTCTTAATCTCAGGGTCGTGGGTTCGAGCCCCACGTTGG…	-0.450546	0.731766	0.596157	0.74041	2.99788	3.44843	21.0658	16.1547	14.0699	11.676	3.65651	6.48169	1.22943	17.3394
tRF-1:16-chrM.Lys-TTT	CACTGTAAAGCTAACT	tRF-5a	-	tRF-16-2YU04DE	16	chrM.tRNA8-LysTTT,CACTGTAAAGCTAACTTAGCATTAACCTTTTAAGTTAAAGATTAAGAGAACCAACACCTCTTTACAGTGACCA,Lys-TTT,0	-0.443355	0.735423	0.663173	0.799345	3.57134	4.0147	73.7302	8.07735	34.3931	4.6704	3.96121	5.89244	9.01579	4.18538
tRF-30:44-Asn-GTT-1-M6	CGGCTGTTAACCGAA	tRF-2	-	-	15	tRNA-Asn-GTT-1-1,GTCTCTGTGGCGCAATCGGTTAGCGCGTTCGGCTGTTAACCGAAAGGTTGGTGGTTCGATCCCACCCAGGGACGCCA,Asn-GTT,29;tRNA-Asn-GTT-2-1,GTCTCTGTGGCGCAATCGGTTAGCGCGTTCGGCTGTTAACCGAAAGGTTGGTGGTTCGAGCCCACCCAGGGACGCCA,Asn-GTT,29;tRNA-Asn-GTT-3-1,GTCTCTGTGGCGCAATCGGTTAGCGCATTCGGCTGTTAACCGAAAGGTTGGTGGTTCGAGCCCACCCAGGGACGCCA,Asn-GTT,29;tRNA-Asn-GTT-4-1,GTCTCTGTGGCGCAATCGGTTAGCGCGTTCGGCTGTTAACCGAAAGATTGGTGGTTCGAGCCCA…	-0.441265	0.736489	0.775582	0.880811	4.85927	5.30053	397.616	2.69245	0	2.3352	2.74238	15.0257	0.204904	113.603
tRF-58:75-Cys-GCA-11-M7	ATCCGGGTGCCCCCTCCA	tRF-3a	-	tRF-18-HSRVK7D2	18	tRNA-Cys-GCA-11-1,GGGGGTATAGCTTAGCGGTAGAGCATTTGACTGCAGATCAAGAGGTCCCCGGTTCAAATCCGGGTGCCCCCTCCA,Cys-GCA,57;tRNA-Cys-GCA-14-1,GGGGGTATAGCTCAGGGGTAGAGCATTTGACTGCAGATCAAGAAGTCCCCGGTTCAAATCCGGGTGCCCCCTCCA,Cys-GCA,57;tRNA-Cys-GCA-2-1,GGGGGTATAGCTCAGTGGTAGAGCATTTGACTGCAGATCAAGAGGTCCCCGGTTCAAATCCGGGTGCCCCCTCCA,Cys-GCA,57;tRNA-Cys-GCA-4-1,GGGGGTATAGCTCAGTGGTAGAGCATTTGACTGCAGATCAAGAGGTCCCTGGTTCAAATCCGGGTGCC…	-0.43355	0.740438	0.60832	0.753317	4.29892	4.73247	71.097	91.5433	21.8865	12.4544	16.759	16.4988	1.43433	33.4831
tRF-1:14-His-GTG-1	GCCGTGATCGTATA	tRF-5a	-	-	14	tRNA-His-GTG-1-1,GCCGTGATCGTATAGTGGTTAGTACTCTGCGTTGTGGCCGCAGCAACCTCGGTTCGAATCCGAGTCACGGCACCA,His-GTG,0	-0.420095	0.747375	0.684954	0.812597	2.65524	3.07534	34.2319	2.69245	9.37992	7.784	0.609418	9.72253	3.07356	4.18538
tRF-1:15-Val-TAC-1-M3	GGTTCCATAGTGTAG	tRF-5a	-	-	15	tRNA-Val-TAC-1-1,GGTTCCATAGTGTAGTGGTTATCACGTCTGCTTTACACGCAGAAGGTCCTGGGTTCGAGCCCCAGTGGAACCACCA,Val-TAC,0;tRNA-Val-TAC-2-1,GGTTCCATAGTGTAGCGGTTATCACGTCTGCTTTACACGCAGAAGGTCCTGGGTTCGAGCCCCAGTGGAACCACCA,Val-TAC,0;tRNA-Val-TAC-3-1,GGTTCCATAGTGTAGTGGTTATCACATCTGCTTTACACGCAGAAGGTCCTGGGTTCAAGCCCCAGTGGAACCACCA,Val-TAC,0	-0.415254	0.749888	0.61284	0.75483	3.85509	4.27034	32.9153	37.6943	18.7598	21.7952	11.8836	14.4365	2.04904	18.5353
tRF-69:85-Leu-AAG-1-M6	TCCCACCGCTGCCACCA	tRF-3a	-	tRF-17-863IP52	17	tRNA-Leu-AAG-1-1,GGTAGCGTGGCCGAGCGGTCTAAGGCGCTGGATTAAGGCTCCAGTCTCTTCGGAGGCGTGGGTTCGAATCCCACCGCTGCCACCA,Leu-AAG,68;tRNA-Leu-AAG-2-1,GGTAGCGTGGCCGAGCGGTCTAAGGCGCTGGATTAAGGCTCCAGTCTCTTCGGGGGCGTGGGTTCGAATCCCACCGCTGCCACCA,Leu-AAG,68;tRNA-Leu-AAG-3-1,GGTAGCGTGGCCGAGCGGTCTAAGGCGCTGGATTAAGGCTCCAGTCTCTTCGGGGGCGTGGGTTCAAATCCCACCGCTGCCACCA,Leu-AAG,68;tRNA-Leu-AAG-4-1,GGTAGCGTGGCCGAGTGGTCTAAGACGCTGGATTAAGGCT…	-0.414333	0.750366	0.612882	0.75483	5.99548	6.40981	194.858	228.858	140.699	35.8064	40.2216	71.8878	10.655	92.0784
tRF-+1:T31-Arg-CCT-2	TCGAGAGGGGCTGTGCTCGCAAGGTTTCTTT	tRF-1	1039	-	31	pre_tRNA-Arg-CCT-2-1,AACACCTATCAAGGAGCACGTGGGTTTAGCGTCTTACCGCGCCCCAGTGGCCTAATGGATAAGGCACTGGCCTCCTAAGCCAGGGATTGTGGGTTCGAGTCCCACCTGGGGTGTCGAGAGGGGCTGTGCTCGCAAGGTTTCTTTTGGTGCCGG,Arg-CCT,113	-0.386563	0.76495	0.64376	0.788563	7.06434	7.4509	356.801	368.866	429.913	52.1528	101.773	76.8964	15.1629	274.442
tRF-61:77-Asn-GTT-1-M5	CCCACCCAGGGACGCCA	tRF-3a	3033a	tRF-17-K5KKOV2	17	tRNA-Asn-GTT-1-1,GTCTCTGTGGCGCAATCGGTTAGCGCGTTCGGCTGTTAACCGAAAGGTTGGTGGTTCGATCCCACCCAGGGACGCCA,Asn-GTT,60;tRNA-Asn-GTT-2-1,GTCTCTGTGGCGCAATCGGTTAGCGCGTTCGGCTGTTAACCGAAAGGTTGGTGGTTCGAGCCCACCCAGGGACGCCA,Asn-GTT,60;tRNA-Asn-GTT-3-1,GTCTCTGTGGCGCAATCGGTTAGCGCATTCGGCTGTTAACCGAAAGGTTGGTGGTTCGAGCCCACCCAGGGACGCCA,Asn-GTT,60;tRNA-Asn-GTT-4-1,GTCTCTGTGGCGCAATCGGTTAGCGCGTTCGGCTGTTAACCGAAAGATTGGTGGTTCGAGCCCA…	-0.379482	0.768714	0.656439	0.797421	2.94137	3.32085	3.94983	37.6943	10.9432	8.5624	7.0083	5.3032	2.04904	7.17494
tRF-60:76-Ala-AGC-8	GCCCGCATCCTCCACCA	tRF-3a	-	tRF-17-PSJR852	17	tRNA-Ala-AGC-8-1,GGGGGATTAGCTCAAATGGTAGAGCGCTCGCTTAGCATGCGAGAGGTAGCGGGATCGATGCCCGCATCCTCCACCA,Ala-AGC,59	-0.376703	0.770196	0.683831	0.812597	2.15116	2.52786	5.26644	32.3094	1.56332	3.1136	2.74238	5.3032	0.819617	5.38121
tRF-60:77-Ile-AAT-1-M4	TCCCCGTACGGGCCACCA	tRF-3a	3022a	tRF-18-8RSH66D2	18	tRNA-Ile-AAT-1-1,GGCCGGTTAGCTCAGTTGGTTAGAGCGTGGCGCTAATAACGCCAAGGTCGCGGGTTCGATCCCCGTACGGGCCACCA,Ile-AAT,59;tRNA-Ile-AAT-5-1,GGCCGGTTAGCTCAGTTGGTTAGAGCGTGGTGCTAATAACGCCAAGGTCGCGGGTTCGATCCCCGTACGGGCCACCA,Ile-AAT,59;tRNA-Ile-AAT-7-1,GGCCGGTTAGCTCAGTTGGTCAGAGCGTGGTGCTAATAACGCCAAGGTCGCGGGTTCGATCCCCGTACGGGCCACCA,Ile-AAT,59;tRNA-Ile-AAT-8-1,GGCCGGTTAGCTCAGTCGGCTAGAGCGTGGTGCTAATAACGCCAAGGTCGCGGGTTCGATCCCC…	-0.361348	0.778437	0.673267	0.807206	4.88264	5.24399	23.699	126.545	53.1529	28.8008	31.6897	30.0514	5.53241	16.7415
tRF-1:16-Gly-TCC-1-M4	GCGTTGGTGGTATAGT	tRF-5a	-	tRF-16-QNR8VPE	16	tRNA-Gly-TCC-1-1,GCGTTGGTGGTATAGTGGTTAGCATAGCTGCCTTCCAAGCAGTTGACCCGGGTTCGATTCCCGGCCAACGCACCA,Gly-TCC,0;tRNA-Gly-TCC-2-1,GCGTTGGTGGTATAGTGGTGAGCATAGCTGCCTTCCAAGCAGTTGACCCGGGTTCGATTCCCGGCCAACGCACCA,Gly-TCC,0;tRNA-Gly-TCC-3-1,GCGTTGGTGGTATAGTGGTAAGCATAGCTGCCTTCCAAGCAGTTGACCCGGGTTCGATTCCCGGCCAACGCACCA,Gly-TCC,0;tRNA-Gly-TCC-4-1,GCGTTGGTGGTATAGTGGTGAGCATAGTTGCCTTCCAAGCAGTTGACCCGGGCTCGATTCCCGCCCAACGCAC…	-0.358937	0.779739	0.7125	0.836494	3.96391	4.32284	47.398	10.7698	4.68996	35.028	2.43767	8.54404	8.60598	23.3186
tRF-1:14-Gly-TCC-1-M4	GCGTTGGTGGTATA	tRF-5a	-	-	14	tRNA-Gly-TCC-1-1,GCGTTGGTGGTATAGTGGTTAGCATAGCTGCCTTCCAAGCAGTTGACCCGGGTTCGATTCCCGGCCAACGCACCA,Gly-TCC,0;tRNA-Gly-TCC-2-1,GCGTTGGTGGTATAGTGGTGAGCATAGCTGCCTTCCAAGCAGTTGACCCGGGTTCGATTCCCGGCCAACGCACCA,Gly-TCC,0;tRNA-Gly-TCC-3-1,GCGTTGGTGGTATAGTGGTAAGCATAGCTGCCTTCCAAGCAGTTGACCCGGGTTCGATTCCCGGCCAACGCACCA,Gly-TCC,0;tRNA-Gly-TCC-4-1,GCGTTGGTGGTATAGTGGTGAGCATAGTTGCCTTCCAAGCAGTTGACCCGGGCTCGATTCCCGCCCAACGCAC…	-0.344657	0.787495	0.723906	0.843313	3.17153	3.51618	26.3322	5.3849	4.68996	19.46	2.43767	8.54404	1.84414	19.7311
tRF-54:75-Gly-TCC-1-M3	TCGATTCCCGGCCAACGCACCA	tRF-3b	3026b	tRF-22-WE8SPOL52	22	tRNA-Gly-TCC-1-1,GCGTTGGTGGTATAGTGGTTAGCATAGCTGCCTTCCAAGCAGTTGACCCGGGTTCGATTCCCGGCCAACGCACCA,Gly-TCC,53;tRNA-Gly-TCC-2-1,GCGTTGGTGGTATAGTGGTGAGCATAGCTGCCTTCCAAGCAGTTGACCCGGGTTCGATTCCCGGCCAACGCACCA,Gly-TCC,53;tRNA-Gly-TCC-3-1,GCGTTGGTGGTATAGTGGTAAGCATAGCTGCCTTCCAAGCAGTTGACCCGGGTTCGATTCCCGGCCAACGCACCA,Gly-TCC,53	-0.336584	0.791914	0.707576	0.832876	4.47483	4.81141	119.812	64.6188	25.0131	10.8976	1.82825	23.2751	4.9177	53.8121
tRF-+1:T14-Asp-GTC-2	GCAGCCGTGCTTTT	tRF-1	-	-	14	pre_tRNA-Asp-GTC-2-1,GTCGGAGTGGGGTCTGGCGTCCCGGCGACCGTCGCCGTCGTCCTCGTTAGTATAGTGGTGAGTATCCCCGCCTGTCACGCGGGAGACCGGGGTTCGATTCCCCGACGGGGAGGCAGCCGTGCTTTTTGGGCCGCCGCCTCGGACCCAGCCTG,Asp-GTC,112	-0.303307	0.810392	0.769744	0.876384	3.04117	3.34448	21.0658	32.3094	20.3232	1.5568	0.609418	3.83009	2.66375	22.1227
tRF-60:76-Val-AAC-1-M5	ACCGGGCGGAAACACCA	tRF-3a	3008a	tRF-17-08Q2B52	17	tRNA-Val-AAC-1-1,GTTTCCGTAGTGTAGTGGTTATCACGTTCGCCTAACACGCGAAAGGTCCCCGGTTCGAAACCGGGCGGAAACACCA,Val-AAC,59;tRNA-Val-AAC-2-1,GTTTCCGTAGTGTAGTGGTCATCACGTTCGCCTAACACGCGAAAGGTCCCCGGTTCGAAACCGGGCGGAAACACCA,Val-AAC,59;tRNA-Val-AAC-4-1,GTTTCCGTAGTGTAGTGGTTATCACGTTCGCCTAACACGCGAAAGGTCCGCGGTTCGAAACCGGGCGGAAACACCA,Val-AAC,59;tRNA-Val-CAC-1-1,GTTTCCGTAGTGTAGTGGTTATCACGTTCGCCTCACACGCGAAAGGTCCCCGGTTCGAAACCGGGCG…	-0.297051	0.813914	0.7174	0.840064	6.84254	7.13959	302.82	401.175	251.695	49.0392	102.382	96.636	13.1139	168.013
tRF-60:76-Lys-TTT-3-M2	TCCCTGTTCGGGCGCCA	tRF-3a	3006a	tRF-17-877S6V2	17	tRNA-Lys-TTT-3-1,GCCCGGATAGCTCAGTCGGTAGAGCATCAGACTTTTAATCTGAGGGTCCAGGGTTCAAGTCCCTGTTCGGGCGCCA,Lys-TTT,59;tRNA-Lys-TTT-5-1,GCCCGGATAGCTCAGTCGGTAGAGCATCAGACTTTTAATCTGAGGGTCCGGGGTTCAAGTCCCTGTTCGGGCGCCA,Lys-TTT,59	-0.292459	0.816509	0.740775	0.860746	3.62514	3.9176	26.3322	35.0018	17.1965	14.0112	6.09418	8.83866	2.04904	26.906
tRF-+1:T15-Asp-GTC-2-6	GAGGCTTAAACTTTT	tRF-1	1028	-	15	pre_tRNA-Asp-GTC-2-6,CTTCACAGGGATTTCCTAAGAGCTCCATTTTCACGTCAATTCCTCGTTAGTATAGTGGTGAGTATCCCCGCCTGTCACGCGGGAGACCGGGGTTCGATTCCCCGACGGGGAGGAGGCTTAAACTTTTTTTTAGAAAAGCACACTTCCGGTAA,Asp-GTC,112	-0.273265	0.827445	0.766708	0.875734	6.78706	7.06032	115.862	258.475	453.363	28.0224	37.4792	40.6578	5.12261	379.076
tRF-1:15-Leu-TAA-1	ACCAGGATGGCCGAG	tRF-5a	-	-	15	tRNA-Leu-TAA-1-1,ACCAGGATGGCCGAGTGGTTAAGGCGTTGGACTTAAGATCCAATGGACATATGTCCGCGTGGGTTCGAACCCCACTCCTGGTACCA,Leu-TAA,0	-0.227296	0.854235	0.835677	0.914846	3.33814	3.56544	67.1471	16.1547	12.5066	2.3352	1.52354	17.0881	3.27847	10.7624
tRF-59:75-Cys-GCA-11-M7	TCCGGGTGCCCCCTCCA	tRF-3a	3003a	tRF-17-8871K92	17	tRNA-Cys-GCA-11-1,GGGGGTATAGCTTAGCGGTAGAGCATTTGACTGCAGATCAAGAGGTCCCCGGTTCAAATCCGGGTGCCCCCTCCA,Cys-GCA,58;tRNA-Cys-GCA-14-1,GGGGGTATAGCTCAGGGGTAGAGCATTTGACTGCAGATCAAGAAGTCCCCGGTTCAAATCCGGGTGCCCCCTCCA,Cys-GCA,58;tRNA-Cys-GCA-2-1,GGGGGTATAGCTCAGTGGTAGAGCATTTGACTGCAGATCAAGAGGTCCCCGGTTCAAATCCGGGTGCCCCCTCCA,Cys-GCA,58;tRNA-Cys-GCA-4-1,GGGGGTATAGCTCAGTGGTAGAGCATTTGACTGCAGATCAAGAGGTCCCTGGTTCAAATCCGGGTGCC…	-0.221612	0.857607	0.799363	0.896556	5.50894	5.73055	129.028	199.241	29.7031	29.5792	26.8144	26.516	3.68828	114.799
tRF-1:15-Leu-AAG-1-M6	GGTAGCGTGGCCGAG	tRF-5a	-	-	15	tRNA-Leu-AAG-1-1,GGTAGCGTGGCCGAGCGGTCTAAGGCGCTGGATTAAGGCTCCAGTCTCTTCGGAGGCGTGGGTTCGAATCCCACCGCTGCCACCA,Leu-AAG,0;tRNA-Leu-AAG-2-1,GGTAGCGTGGCCGAGCGGTCTAAGGCGCTGGATTAAGGCTCCAGTCTCTTCGGGGGCGTGGGTTCGAATCCCACCGCTGCCACCA,Leu-AAG,0;tRNA-Leu-AAG-3-1,GGTAGCGTGGCCGAGCGGTCTAAGGCGCTGGATTAAGGCTCCAGTCTCTTCGGGGGCGTGGGTTCAAATCCCACCGCTGCCACCA,Leu-AAG,0;tRNA-Leu-AAG-4-1,GGTAGCGTGGCCGAGTGGTCTAAGACGCTGGATTAAGGCTCCA…	-0.207221	0.866204	0.841363	0.918589	3.71313	3.92035	84.2631	5.3849	9.37992	11.676	3.96121	25.9267	4.30299	5.38121
tRF-60:76-Tyr-GTA-1-M5	TCCGGCTCGAAGGACCA	tRF-3a	-	tRF-17-884U1D2	17	tRNA-Tyr-GTA-1-1,CCTTCGATAGCTCAGTTGGTAGAGCGGAGGACTGTAGATCCTTAGGTCGCTGGTTCGAATCCGGCTCGAAGGACCA,Tyr-GTA,59;tRNA-Tyr-GTA-2-1,CCTTCGATAGCTCAGTTGGTAGAGCGGAGGACTGTAGATCCTTAGGTCGCTGGTTCGATTCCGGCTCGAAGGACCA,Tyr-GTA,59;tRNA-Tyr-GTA-5-1,CCTTCGATAGCTCAGCTGGTAGAGCGGAGGACTGTAGATCCTTAGGTCGCTGGTTCGATTCCGGCTCGAAGGACCA,Tyr-GTA,59;tRNA-Tyr-GTA-7-1,CCTTCGATAGCTCAGCTGGTAGAGCGGAGGACTGTAGATCCTTAGGTCGCTGGTTCAATTCCGGCTC…	-0.193952	0.874208	0.817803	0.906473	7.38569	7.57964	308.087	662.343	229.808	106.641	130.111	328.798	19.4659	63.3787
tRF-1:32-Val-AAC-2	GTTTCCGTAGTGTAGTGGTCATCACGTTCGCC	tRF-5c	-	tRF-32-79MP9P9MH57SJ	32	tRNA-Val-AAC-2-1,GTTTCCGTAGTGTAGTGGTCATCACGTTCGCCTAACACGCGAAAGGTCCCCGGTTCGAAACCGGGCGGAAACACCA,Val-AAC,0	-0.179069	0.883273	0.83591	0.914846	7.10106	7.28012	260.689	387.713	96.9259	174.362	45.7063	165.578	79.5028	33.4831
tRF-57:75-Ala-CGC-1-M6	ATCCCCGGCATCTCCACCA	tRF-3b	-	tRF-19-HRMFWRE2	19	tRNA-Ala-CGC-1-1,GGGGATGTAGCTCAGTGGTAGAGCGCATGCTTCGCATGTATGAGGTCCCGGGTTCGATCCCCGGCATCTCCACCA,Ala-CGC,56;tRNA-Ala-CGC-2-1,GGGGATGTAGCTCAGTGGTAGAGCGCATGCTTCGCATGTATGAGGCCCCGGGTTCGATCCCCGGCATCTCCACCA,Ala-CGC,56;tRNA-Ala-CGC-3-1,GGGGATGTAGCTCAGTGGTAGAGCGCGCGCTTCGCATGTGTGAGGTCCCGGGTTCAATCCCCGGCATCTCCACCA,Ala-CGC,56;tRNA-Ala-TGC-2-1,GGGGATGTAGCTCAGTGGTAGAGCGCATGCTTTGCATGTATGAGGTCCCGGGTTCGATCCCCGGCATCTC…	-0.175322	0.88557	0.868204	0.932133	2.53837	2.71369	25.0156	18.8471	3.12664	3.1136	1.52354	11.4903	0	10.1645
tRF-30:43-Asn-GTT-1-M6	CGGCTGTTAACCGA	tRF-2	-	-	14	tRNA-Asn-GTT-1-1,GTCTCTGTGGCGCAATCGGTTAGCGCGTTCGGCTGTTAACCGAAAGGTTGGTGGTTCGATCCCACCCAGGGACGCCA,Asn-GTT,29;tRNA-Asn-GTT-2-1,GTCTCTGTGGCGCAATCGGTTAGCGCGTTCGGCTGTTAACCGAAAGGTTGGTGGTTCGAGCCCACCCAGGGACGCCA,Asn-GTT,29;tRNA-Asn-GTT-3-1,GTCTCTGTGGCGCAATCGGTTAGCGCATTCGGCTGTTAACCGAAAGGTTGGTGGTTCGAGCCCACCCAGGGACGCCA,Asn-GTT,29;tRNA-Asn-GTT-4-1,GTCTCTGTGGCGCAATCGGTTAGCGCGTTCGGCTGTTAACCGAAAGATTGGTGGTTCGAGCCCA…	-0.163692	0.892737	1	1	1.08136	1.24505	21.0658	0	0	0	0	0.589244	0	8.96868
tRF-54:75-Glu-TTC-2	TCGACTCCCGGTGTGGGAACCA	tRF-3b	3015b	tRF-22-WD8S746D2	22	tRNA-Glu-TTC-2-1,TCCCACATGGTCTAGCGGTTAGGATTCCTGGTTTTCACCCAGGCGGCCCGGGTTCGACTCCCGGTGTGGGAACCA,Glu-TTC,53	-0.143099	0.905572	0.863292	0.931284	6.77583	6.91893	107.962	312.324	220.428	88.7376	34.7368	85.1458	17.8267	275.637
tRF-+1:T27-Val-TAC-1-2	TAGCCGTAAGGCGGCTGTTTTTGCTTT	tRF-1	-	-	27	pre_tRNA-Val-TAC-1-2,AGTCTATGAATAAAGTCCCAACAATATTCTTCCTCGTAGAGGTTCCATAGTGTAGTGGTTATCACGTCTGCTTTACACGCAGAAGGTCCTGGGTTCGAGCCCCAGTGGAACCATAGCCGTAAGGCGGCTGTTTTTGCTTTTATAGGGTTTCGT,Val-TAC,113	-0.126581	0.916	0.885493	0.946201	5.96537	6.09195	109.279	53.849	139.136	70.056	47.2299	26.2214	20.6953	83.1098
tRF-59:75-Gln-CTG-1-M5	TCTCGGTGGAACCTCCA	tRF-3a	3004a	tRF-17-WS72092	17	tRNA-Gln-CTG-1-1,GGTTCCATGGTGTAATGGTTAGCACTCTGGACTCTGAATCCAGCGATCCGAGTTCAAATCTCGGTGGAACCTCCA,Gln-CTG,58;tRNA-Gln-CTG-2-1,GGTTCCATGGTGTAATGGTTAGCACTCTGGACTCTGAATCCAGCGATCCGAGTTCAAGTCTCGGTGGAACCTCCA,Gln-CTG,58;tRNA-Gln-CTG-3-1,GGTTCCATGGTGTAATGGTGAGCACTCTGGACTCTGAATCCAGCGATCCGAGTTCGAGTCTCGGTGGAACCTCCA,Gln-CTG,58;tRNA-Gln-CTG-4-1,GGTTCCATGGTGTAATGGTAAGCACTCTGGACTCTGAATCCAGCGATCCGAGTTCGAGTCTCGGTGGAAC…	-0.126294	0.916182	0.877825	0.94023	7.79755	7.92385	242.256	527.72	340.804	250.645	160.886	281.659	29.916	274.442
tiRNA-1:33-Pro-AGG-1-M2	GGCTCGTTGGTCTAGGGGTATGATTCTCGCTTA	tiRNA-5	-	-	33	tRNA-Pro-AGG-1-1,GGCTCGTTGGTCTAGGGGTATGATTCTCGCTTAGGATGCGAGAGGTCCCGGGTTCAAATCCCGGACGAGCCCCCA,Pro-AGG,0;tRNA-Pro-AGG-2-1,GGCTCGTTGGTCTAGGGGTATGATTCTCGCTTAGGGTGCGAGAGGTCCCGGGTTCAAATCCCGGACGAGCCCCCA,Pro-AGG,0	-0.0870208	0.941465	0.936342	0.978817	3.81797	3.905	78.9966	13.4622	12.5066	8.5624	2.74238	7.36555	5.32751	30.4935
tRF-59:75-Ala-CGC-1-M6	CCCCGGCATCTCCACCA	tRF-3a	-	tRF-17-KSPM852	17	tRNA-Ala-CGC-1-1,GGGGATGTAGCTCAGTGGTAGAGCGCATGCTTCGCATGTATGAGGTCCCGGGTTCGATCCCCGGCATCTCCACCA,Ala-CGC,58;tRNA-Ala-CGC-2-1,GGGGATGTAGCTCAGTGGTAGAGCGCATGCTTCGCATGTATGAGGCCCCGGGTTCGATCCCCGGCATCTCCACCA,Ala-CGC,58;tRNA-Ala-CGC-3-1,GGGGATGTAGCTCAGTGGTAGAGCGCGCGCTTCGCATGTGTGAGGTCCCGGGTTCAATCCCCGGCATCTCCACCA,Ala-CGC,58;tRNA-Ala-TGC-2-1,GGGGATGTAGCTCAGTGGTAGAGCGCATGCTTTGCATGTATGAGGTCCCGGGTTCGATCCCCGGCATCTC…	-0.0749518	0.949374	0.931804	0.978817	5.83684	5.91179	156.677	193.856	73.4761	22.5736	54.8476	65.4061	5.73732	58.5954
tiRNA-1:20-chrM.Ser-GCT	GAGAAAGCTCACAAGAACTG	tiRNA-5	-	tRF-20-5BF900BY	20	chrM.tRNA12-SerGCT,GAGAAAGCTCACAAGAACTGCTAACTCATGCCCCCATGTCTAACAACATGGCTTTCTCACCA,Ser-GCT,0	-0.0630448	0.957242	0.95022	0.978817	4.21011	4.27315	18.4325	29.6169	64.0962	7.0056	8.53185	20.3289	5.53241	23.3186
tRF-58:75-Ala-CGC-1-M6	TCCCCGGCATCTCCACCA	tRF-3a	3021a	tRF-18-8R6Q46D2	18	tRNA-Ala-CGC-1-1,GGGGATGTAGCTCAGTGGTAGAGCGCATGCTTCGCATGTATGAGGTCCCGGGTTCGATCCCCGGCATCTCCACCA,Ala-CGC,57;tRNA-Ala-CGC-2-1,GGGGATGTAGCTCAGTGGTAGAGCGCATGCTTCGCATGTATGAGGCCCCGGGTTCGATCCCCGGCATCTCCACCA,Ala-CGC,57;tRNA-Ala-CGC-3-1,GGGGATGTAGCTCAGTGGTAGAGCGCGCGCTTCGCATGTGTGAGGTCCCGGGTTCAATCCCCGGCATCTCCACCA,Ala-CGC,57;tRNA-Ala-TGC-2-1,GGGGATGTAGCTCAGTGGTAGAGCGCATGCTTTGCATGTATGAGGTCCCGGGTTCGATCCCCGGCATCTC…	-0.061571	0.95822	0.940857	0.978817	7.56295	7.62452	568.776	651.573	168.839	88.7376	145.041	215.663	19.6708	267.865
tRF-1:32-Gly-TCC-2	GCGTTGGTGGTATAGTGGTGAGCATAGCTGCC	tRF-5c	-	tRF-32-QNR8VP94FQFYJ	32	tRNA-Gly-TCC-2-1,GCGTTGGTGGTATAGTGGTGAGCATAGCTGCCTTCCAAGCAGTTGACCCGGGTTCGATTCCCGGCCAACGCACCA,Gly-TCC,0	-0.0545873	0.96287	0.948642	0.978817	9.02423	9.07882	1881.44	807.735	250.131	576.016	160.277	1039.13	154.088	291.781
tRF-+1:T15-Ser-GCT-4	TTTCTGGAGGTTTTT	tRF-1	-	-	15	pre_tRNA-Ser-GCT-4-1,TGTGCGGAGGAAGAAAATGACTTTGCCACGCTTAGCATGTGACGAGGTGGCCGAGTGGTTAAGGCGATGGACTGCTAATCCATTGTGCTCTGCACGCGTGGGTTCGAATCCCATCCTCGTCGTTTCTGGAGGTTTTTATTTAACCCTCTGAAAGGATGGGTC,Ser-GCT,122	-0.0540662	0.963218	1	1	1.38281	1.43688	21.0658	2.69245	0	0	0	3.24084	0.819617	4.7833
tRF-1:16-Gly-CCC-2	GCGCCGCTGGTGTAGT	tRF-5a	-	tRF-16-Q1Q89PE	16	tRNA-Gly-CCC-2-1,GCGCCGCTGGTGTAGTGGTATCATGCAAGATTCCCATTCTTGCGACCCGGGTTCGATTCCCGGGCGGCGCACCA,Gly-CCC,0	-0.0531171	0.963852	0.963365	0.987395	5.32844	5.38155	110.595	13.4622	9.37992	73.1696	6.39888	39.774	16.3923	62.7808
tRF-1:14-SeC-TCA-1	GCCCGGATGATCCT	tRF-5a	-	-	14	tRNA-SeC-TCA-1-1,GCCCGGATGATCCTCAGTGGTCTGGGGTGCAGGCTTCAAACCTGTAGCTGTCTAGCGACAGAGTGGTTCAATTCCACCTTTCGGGCGCCA,SeC-TCA,0	-0.0508116	0.965393	1	1	2.22447	2.27528	31.5987	0	0	3.892	1.82825	4.71395	2.04904	4.18538
tRF-1:31-Gly-TCC-1	GCGTTGGTGGTATAGTGGTTAGCATAGCTGC	tRF-5c	-	tRF-31-QNR8VP9NFQFYD	31	tRNA-Gly-TCC-1-1,GCGTTGGTGGTATAGTGGTTAGCATAGCTGCCTTCCAAGCAGTTGACCCGGGTTCGATTCCCGGCCAACGCACCA,Gly-TCC,0	-0.0376596	0.974234	0.970475	0.990191	6.20939	6.24705	221.191	72.6961	64.0962	91.0728	17.0637	62.1653	55.3241	13.1541
tRF-69:85-Ser-AGA-1-M6	TCCTGCCGACTACGCCA	tRF-3a	-	tRF-17-8Y3DUV2	17	tRNA-Ser-AGA-1-1,GTAGTCGTGGCCGAGTGGTTAAGGCGATGGACTAGAAATCCATTGGGGTTTCCCCGCGCAGGTTCGAATCCTGCCGACTACGCCA,Ser-AGA,68;tRNA-Ser-AGA-2-1,GTAGTCGTGGCCGAGTGGTTAAGGCGATGGACTAGAAATCCATTGGGGTCTCCCCGCGCAGGTTCGAATCCTGCCGACTACGCCA,Ser-AGA,68;tRNA-Ser-AGA-3-1,GTAGTCGTGGCCGAGTGGTTAAGGCGATGGACTAGAAATCCATTGGGGTTTCCCCACGCAGGTTCGAATCCTGCCGACTACGCCA,Ser-AGA,68;tRNA-Ser-AGA-4-1,GTAGTCGTGGCCGAGTGGTTAAGGTGATGGACTAGAAACC…	-0.0142985	0.990138	0.987315	0.998297	4.19353	4.20782	39.4983	70.0037	26.5765	3.892	6.09418	27.3999	1.84414	34.081
tRF-68:85-Ser-CGA-1-M3	ATCCTGCTCACAGCGCCA	tRF-3a	-	tRF-18-H7Q6JHD2	18	tRNA-Ser-CGA-1-1,GCTGTGATGGCCGAGTGGTTAAGGCGTTGGACTCGAAATCCAATGGGGTCTCCCCGCGCAGGTTCGAATCCTGCTCACAGCGCCA,Ser-CGA,67;tRNA-Ser-CGA-2-1,GCTGTGATGGCCGAGTGGTTAAGGCGTTGGACTCGAAATCCAATGGGGTCTCCCCGCGCAGGTTCAAATCCTGCTCACAGCGCCA,Ser-CGA,67;tRNA-Ser-CGA-3-1,GCTGTGATGGCCGAGTGGTTAAGGTGTTGGACTCGAAATCCAATGGGGGTTCCCCGCGCAGGTTCAAATCCTGCTCACAGCGCCA,Ser-CGA,67	-0.00613115	0.995759	1	1	3.07776	3.08389	28.9654	29.6169	6.25328	2.3352	3.04709	10.901	1.63923	13.752
tRF-1:32-Val-AAC-1-M6	GTTTCCGTAGTGTAGTGGTTATCACGTTCGCC	tRF-5c	-	tRF-32-79MP9P9NH57SJ	32	tRNA-Val-AAC-1-1,GTTTCCGTAGTGTAGTGGTTATCACGTTCGCCTAACACGCGAAAGGTCCCCGGTTCGAAACCGGGCGGAAACACCA,Val-AAC,0;tRNA-Val-AAC-3-1,GTTTCCGTAGTGTAGTGGTTATCACGTTCGCCTAACACGCGAAAGGTCCCTGGATCAAAACCAGGCGGAAACACCA,Val-AAC,0;tRNA-Val-AAC-4-1,GTTTCCGTAGTGTAGTGGTTATCACGTTCGCCTAACACGCGAAAGGTCCGCGGTTCGAAACCGGGCGGAAACACCA,Val-AAC,0;tRNA-Val-CAC-1-1,GTTTCCGTAGTGTAGTGGTTATCACGTTCGCCTCACACGCGAAAGGTCCCCGGTTCGAAACCGGGCGGAA…	0.0114517	1.00797	0.989463	0.998297	10.0094	9.99793	1823.51	3112.47	952.062	791.633	225.485	1244.78	615.532	412.559
tiRNA-1:34-Val-TAC-1	GGTTCCATAGTGTAGTGGTTATCACGTCTGCTTT	tiRNA-5	-	tRF-34-R9JP9P9NH5SYHQ	34	tRNA-Val-TAC-1-1,GGTTCCATAGTGTAGTGGTTATCACGTCTGCTTTACACGCAGAAGGTCCTGGGTTCGAGCCCCAGTGGAACCACCA,Val-TAC,0	0.0188659	1.01316	0.983045	0.99627	7.8858	7.86694	280.438	312.324	472.123	224.179	163.324	107.537	105.116	224.815
tiRNA-1:33-Pro-CGG-1-M2	GGCTCGTTGGTCTAGGGGTATGATTCTCGCTTC	tiRNA-5	-	tRF-33-6978WPRLXN4V05	33	tRNA-Pro-CGG-1-1,GGCTCGTTGGTCTAGGGGTATGATTCTCGCTTCGGGTGCGAGAGGTCCCGGGTTCAAATCCCGGACGAGCCCCCA,Pro-CGG,0;tRNA-Pro-CGG-2-1,GGCTCGTTGGTCTAGGGGTATGATTCTCGCTTCGGGTGTGAGAGGTCCCGGGTTCAAATCCCGGACGAGCCCCCA,Pro-CGG,0	0.0251237	1.01757	0.976318	0.992128	7.03941	7.01428	530.594	137.315	148.515	93.408	54.2382	43.0148	64.9546	192.528
tiRNA-1:33-Ala-CGC-3	GGGGATGTAGCTCAGTGGTAGAGCGCGCGCTTC	tiRNA-5	-	-	33	tRNA-Ala-CGC-3-1,GGGGATGTAGCTCAGTGGTAGAGCGCGCGCTTCGCATGTGTGAGGTCCCGGGTTCAATCCCCGGCATCTCCACCA,Ala-CGC,0	0.0494539	1.03487	0.976763	0.992128	3.36722	3.31776	15.7993	18.8471	28.1398	3.1136	5.18005	11.4903	3.48337	10.1645
tRF-1:31-Gly-CCC-3	GCATTGGTGGTTCAATGGTAGAATTCTCGCC	tRF-5c	-	-	31	tRNA-Gly-CCC-3-1,GCATTGGTGGTTCAATGGTAGAATTCTCGCCTCCCACGCAGGAGACCCAGGTTCGATTCCTGGCCAATGCACCA,Gly-CCC,0	0.0618693	1.04382	0.947221	0.978817	6.18603	6.12416	65.8305	86.1584	162.585	63.8288	41.4404	40.0686	48.7672	10.7624
tRF-1:15-SeC-TCA-1	GCCCGGATGATCCTC	tRF-5a	-	-	15	tRNA-SeC-TCA-1-1,GCCCGGATGATCCTCAGTGGTCTGGGGTGCAGGCTTCAAACCTGTAGCTGTCTAGCGACAGAGTGGTTCAATTCCACCTTTCGGGCGCCA,SeC-TCA,0	0.0645487	1.04576	0.968635	0.990191	3.91728	3.85273	18.4325	37.6943	7.8166	17.9032	9.75068	8.24942	7.99126	8.96868
tRF-1:15-Gly-CCC-2	GCGCCGCTGGTGTAG	tRF-5a	5007a	-	15	tRNA-Gly-CCC-2-1,GCGCCGCTGGTGTAGTGGTATCATGCAAGATTCCCATTCTTGCGACCCGGGTTCGATTCCCGGGCGGCGCACCA,Gly-CCC,0	0.0733438	1.05215	0.936038	0.978817	4.13403	4.06069	114.545	10.7698	10.9432	5.4488	1.52354	27.3999	2.25395	38.2664
tRF-60:76-Val-CAC-3	CCCGGGCGGAAACACCA	tRF-3a	-	tRF-17-K8Q2B52	17	tRNA-Val-CAC-3-1,GTTTCCGTAGTGTAGCGGTTATCACATTCGCCTCACACGCGAAAGGTCCCCGGTTCGATCCCGGGCGGAAACACCA,Val-CAC,59	0.0787378	1.05609	0.955178	0.981229	3.43967	3.36093	23.699	37.6943	10.9432	3.892	10.3601	9.13328	2.04904	10.7624
tRF-58:75-Ala-AGC-2-M4	TCCCCGGCACCTCCACCA	tRF-3a	3020a	tRF-18-8R6546D2	18	tRNA-Ala-AGC-2-1,GGGGGTGTAGCTCAGTGGTAGAGCGCGTGCTTAGCATGCACGAGGCCCCGGGTTCAATCCCCGGCACCTCCACCA,Ala-AGC,57;tRNA-Ala-AGC-3-1,GGGGGTGTAGCTCAGTGGTAGAGCGCGTGCTTAGCATGTACGAGGTCCCGGGTTCAATCCCCGGCACCTCCACCA,Ala-AGC,57;tRNA-Ala-TGC-1-1,GGGGGTGTAGCTCAGTGGTAGAGCGCATGCTTTGCATGTATGAGGTCCCGGGTTCGATCCCCGGCACCTCCACCA,Ala-TGC,57;tRNA-Ala-TGC-6-1,GGGGGTGTAGCTCAGTGGTAGAGCACATGCTTTGCATGTGTGAGGCCCCGGGTTCGATCCCCGGCACCTC…	0.0797685	1.05685	0.928548	0.97833	7.11926	7.03949	546.393	379.635	82.856	48.2608	44.4875	201.521	8.19617	300.152
tRF-+1:T16-Glu-TTC-2-2	TGACTGGACCTTTCTT	tRF-1	-	-	16	pre_tRNA-Glu-TTC-2-2,ATGATTCAATTGGTTTAGAATTCAACGGTTACTTGTCATCTCCCACATGGTCTAGCGGTTAGGATTCCTGGTTTTCACCCAGGCGGCCCGGGTTCGACTCCCGGTGTGGGAATGACTGGACCTTTCTTTTGGAACACAGTGAAACTCGTAAA,Glu-TTC,112	0.0913597	1.06537	0.94936	0.978817	3.75327	3.66191	7.89966	26.9245	39.083	4.6704	5.78947	9.13328	0.819617	37.6685
tRF-+1:T30-Arg-CCT-2	TCGAGAGGGGCTGTGCTCGCAAGGTTTCTT	tRF-1	-	-	30	pre_tRNA-Arg-CCT-2-1,AACACCTATCAAGGAGCACGTGGGTTTAGCGTCTTACCGCGCCCCAGTGGCCTAATGGATAAGGCACTGGCCTCCTAAGCCAGGGATTGTGGGTTCGAGTCCCACCTGGGGTGTCGAGAGGGGCTGTGCTCGCAAGGTTTCTTTTGGTGCCGG,Arg-CCT,113	0.0936899	1.0671	0.943206	0.978817	3.03365	2.93996	21.0658	13.4622	18.7598	1.5568	4.87534	5.59782	0.819617	18.5353
tRF-68:85-Ser-TGA-1	ACCCTGCTCGCTGCGCCA	tRF-3a	-	tRF-18-07QSNHD2	18	tRNA-Ser-TGA-1-1,GCAGCGATGGCCGAGTGGTTAAGGCGTTGGACTTGAAATCCAATGGGGTCTCCCCGCGCAGGTTCGAACCCTGCTCGCTGCGCCA,Ser-TGA,67	0.108268	1.07793	0.921319	0.972981	3.97258	3.86431	50.0312	32.3094	17.1965	7.0056	7.61772	27.6945	1.02452	21.5248
tRF-1:14-Glu-CTC-1-M4	TCCCTGGTGGTCTA	tRF-5a	-	-	14	tRNA-Glu-CTC-1-1,TCCCTGGTGGTCTAGTGGTTAGGATTCGGCGCTCTCACCGCCGCGGCCCGGGTTCGATTCCCGGTCAGGGAACCA,Glu-CTC,0;tRNA-Glu-CTC-2-1,TCCCTGGTGGTCTAGTGGTTAGGATTCGGCGCTCTCACCGCCGCGGCCCGGGTTCGATTCCCGGTCAGGAAACCA,Glu-CTC,0;tRNA-Glu-TTC-3-1,TCCCTGGTGGTCTAGTGGCTAGGATTCGGCGCTTTCACCGCCGCGGCCCGGGTTCGATTCCCGGCCAGGGAACCA,Glu-TTC,0;tRNA-Glu-TTC-4-1,TCCCTGGTGGTCTAGTGGCTAGGATTCGGCGCTTTCACCGCCGCGGCCCGGGTTCGATTCCCGGTCAGGGAAC…	0.111388	1.08027	0.909808	0.963075	4.40088	4.28949	57.9309	35.0018	6.25328	22.5736	3.04709	21.5074	6.14713	43.0497
tRF-53:74-Gly-GCC-1	TCGATTCCCGGCCCATGCACCA	tRF-3b	3028b	tRF-22-WE8SP6X52	22	tRNA-Gly-GCC-1-1,GCATGGGTGGTTCAGTGGTAGAATTCTCGCCTGCCACGCGGGAGGCCCGGGTTCGATTCCCGGCCCATGCACCA,Gly-GCC,52	0.121636	1.08797	0.950666	0.978817	1.95797	1.83633	21.0658	10.7698	0	0	0.304709	7.07093	0.409808	7.17494
tRF-+1:T14-Gly-TCC-2-2	GCGGGCGGACCTTT	tRF-1	-	-	14	pre_tRNA-Gly-TCC-2-2,GAGCCCCGGGCCGGCGCGGCGGGGCTGCCCGCGCCGTGCGGCGTTGGTGGTATAGTGGTGAGCATAGCTGCCTTCCAAGCAGTTGACCCGGGTTCGATTCCCGGCCAACGCAGCGGGCGGACCTTTTGCGGAGGTCCCCGTCGCGGAGCTCG,Gly-TCC,112	0.132009	1.09582	0.890417	0.949218	4.35446	4.22245	60.5641	32.3094	29.7031	9.3408	3.65651	17.6773	5.73732	44.8434
tRF-1:31-Gly-TCC-2	GCGTTGGTGGTATAGTGGTGAGCATAGCTGC	tRF-5c	-	-	31	tRNA-Gly-TCC-2-1,GCGTTGGTGGTATAGTGGTGAGCATAGCTGCCTTCCAAGCAGTTGACCCGGGTTCGATTCCCGGCCAACGCACCA,Gly-TCC,0	0.152965	1.11185	0.861844	0.931284	6.51277	6.3598	443.698	61.9263	43.773	63.8288	23.4626	164.399	38.1122	34.6789
tRF-59:75-Gln-TTG-1-M3	TCTCGGTGGGACCTCCA	tRF-3a	3005a	tRF-17-WS7K092	17	tRNA-Gln-TTG-1-1,GGTCCCATGGTGTAATGGTTAGCACTCTGGACTTTGAATCCAGCGATCCGAGTTCAAATCTCGGTGGGACCTCCA,Gln-TTG,58;tRNA-Gln-TTG-2-1,GGTCCCATGGTGTAATGGTTAGCACTCTGGACTTTGAATCCAGCAATCCGAGTTCGAATCTCGGTGGGACCTCCA,Gln-TTG,58;tRNA-Gln-TTG-3-1,GGCCCCATGGTGTAATGGTTAGCACTCTGGACTTTGAATCCAGCGATCCGAGTTCAAATCTCGGTGGGACCTCCA,Gln-TTG,58	0.165869	1.12184	0.847911	0.921288	6.37903	6.21316	114.545	204.626	103.179	52.9312	51.8005	77.191	6.14713	173.394
tRF-+1:T15-Gly-TCC-2-2	GCGGGCGGACCTTTT	tRF-1	1023	-	15	pre_tRNA-Gly-TCC-2-2,GAGCCCCGGGCCGGCGCGGCGGGGCTGCCCGCGCCGTGCGGCGTTGGTGGTATAGTGGTGAGCATAGCTGCCTTCCAAGCAGTTGACCCGGGTTCGATTCCCGGCCAACGCAGCGGGCGGACCTTTTGCGGAGGTCCCCGTCGCGGAGCTCG,Gly-TCC,112	0.16748	1.1231	0.847314	0.921288	4.18473	4.01725	67.1471	29.6169	21.8865	5.4488	3.3518	21.802	6.14713	28.1019
tRF-1:14-Ala-AGC-4-M7	GGGGATGTAGCTCA	tRF-5a	-	-	14	tRNA-Ala-AGC-4-1,GGGGATGTAGCTCAGTGGTAGAGCGCATGCTTAGCATGCATGAGGTCCCGGGTTCGATCCCCAGCATCTCCACCA,Ala-AGC,0;tRNA-Ala-CGC-1-1,GGGGATGTAGCTCAGTGGTAGAGCGCATGCTTCGCATGTATGAGGTCCCGGGTTCGATCCCCGGCATCTCCACCA,Ala-CGC,0;tRNA-Ala-CGC-2-1,GGGGATGTAGCTCAGTGGTAGAGCGCATGCTTCGCATGTATGAGGCCCCGGGTTCGATCCCCGGCATCTCCACCA,Ala-CGC,0;tRNA-Ala-CGC-3-1,GGGGATGTAGCTCAGTGGTAGAGCGCGCGCTTCGCATGTGTGAGGTCCCGGGTTCAATCCCCGGCATCTCCAC…	0.168526	1.12391	0.902189	0.957252	3.25534	3.08681	13.1661	10.7698	25.0131	3.892	5.18005	6.18706	0.614713	24.5144
tRF-68:85-Ser-AGA-1-M6	ATCCTGCCGACTACGCCA	tRF-3a	3014a	tRF-18-H7PU4HD2	18	tRNA-Ser-AGA-1-1,GTAGTCGTGGCCGAGTGGTTAAGGCGATGGACTAGAAATCCATTGGGGTTTCCCCGCGCAGGTTCGAATCCTGCCGACTACGCCA,Ser-AGA,67;tRNA-Ser-AGA-2-1,GTAGTCGTGGCCGAGTGGTTAAGGCGATGGACTAGAAATCCATTGGGGTCTCCCCGCGCAGGTTCGAATCCTGCCGACTACGCCA,Ser-AGA,67;tRNA-Ser-AGA-3-1,GTAGTCGTGGCCGAGTGGTTAAGGCGATGGACTAGAAATCCATTGGGGTTTCCCCACGCAGGTTCGAATCCTGCCGACTACGCCA,Ser-AGA,67;tRNA-Ser-AGA-4-1,GTAGTCGTGGCCGAGTGGTTAAGGTGATGGACTAGAAACC…	0.169716	1.12484	0.850379	0.921754	6.05958	5.88986	188.275	215.396	56.2795	13.2328	17.0637	96.0468	4.50789	150.674
tRF-1:15-Ala-AGC-4-M7	GGGGATGTAGCTCAG	tRF-5a	-	-	15	tRNA-Ala-AGC-4-1,GGGGATGTAGCTCAGTGGTAGAGCGCATGCTTAGCATGCATGAGGTCCCGGGTTCGATCCCCAGCATCTCCACCA,Ala-AGC,0;tRNA-Ala-CGC-1-1,GGGGATGTAGCTCAGTGGTAGAGCGCATGCTTCGCATGTATGAGGTCCCGGGTTCGATCCCCGGCATCTCCACCA,Ala-CGC,0;tRNA-Ala-CGC-2-1,GGGGATGTAGCTCAGTGGTAGAGCGCATGCTTCGCATGTATGAGGCCCCGGGTTCGATCCCCGGCATCTCCACCA,Ala-CGC,0;tRNA-Ala-CGC-3-1,GGGGATGTAGCTCAGTGGTAGAGCGCGCGCTTCGCATGTGTGAGGTCCCGGGTTCAATCCCCGGCATCTCCAC…	0.179133	1.1322	0.865508	0.931451	3.36389	3.18476	31.5987	16.1547	15.6332	3.1136	3.96121	9.13328	0.204904	28.6998
tRF-60:76-Thr-TGT-3-M4	TCTCGCTGGGGCCTCCA	tRF-3a	3007a	tRF-17-WSNKP92	17	tRNA-Thr-TGT-3-1,GGCTCCATAGCTCAGGGGTTAGAGCGCTGGTCTTGTAAACCAGGGGTCGCGAGTTCAATTCTCGCTGGGGCCTCCA,Thr-TGT,59;tRNA-Thr-TGT-4-1,GGCTCCATAGCTCAGGGGTTAGAGCACTGGTCTTGTAAACCAGGGGTCGCGAGTTCAAATCTCGCTGGGGCCTCCA,Thr-TGT,59;tRNA-Thr-TGT-5-1,GGCCCTATAGCTCAGGGGTTAGAGCACTGGTCTTGTAAACCAGGGGTCGCGAGTTCAAATCTCGCTGGGGCCTCCA,Thr-TGT,59;tRNA-Thr-TGT-6-1,GGCTCCATAGCTCAGGGGTTAGAGCACTGGTCTTGTAAACCAGGGTCGCGAGTTCAAATCTCGCTGG…	0.195969	1.14549	0.832915	0.914846	4.1595	3.96353	35.5485	67.3112	9.37992	6.2272	19.5014	10.3118	2.66375	21.5248
tRF-59:76-Tyr-GTA-1-M2	ATCCGGCTCGAAGGACCA	tRF-3a	-	tRF-18-HSQSD2D2	18	tRNA-Tyr-GTA-1-1,CCTTCGATAGCTCAGTTGGTAGAGCGGAGGACTGTAGATCCTTAGGTCGCTGGTTCGAATCCGGCTCGAAGGACCA,Tyr-GTA,58;tRNA-Tyr-GTA-8-1,CTTTCGATAGCTCAGTTGGTAGAGCGGAGGACTGTAGATCCTTAGGTCGCTGGTTCGAATCCGGCTCGAAGGACCA,Tyr-GTA,58	0.202785	1.15092	0.810569	0.904636	5.84792	5.64514	98.7458	142.7	57.8429	34.2496	34.7368	85.735	8.40107	66.9661
tRF-1:22-Gly-CCC-2	GCGCCGCTGGTGTAGTGGTATC	tRF-5b	-	tRF-22-Q1Q89P9L5	22	tRNA-Gly-CCC-2-1,GCGCCGCTGGTGTAGTGGTATCATGCAAGATTCCCATTCTTGCGACCCGGGTTCGATTCCCGGGCGGCGCACCA,Gly-CCC,0	0.205693	1.15324	0.834119	0.914846	3.79018	3.58448	46.0814	10.7698	10.9432	10.8976	3.96121	19.1504	3.89318	18.5353
tRF-1:31-Gly-CCC-1-M4	GCATTGGTGGTTCAGTGGTAGAATTCTCGCC	tRF-5c	5004c	tRF-31-PNR8YP9LON4VD	31	tRNA-Gly-CCC-1-1,GCATTGGTGGTTCAGTGGTAGAATTCTCGCCTCCCACGCGGGAGACCCGGGTTCAATTCCCGGCCAATGCACCA,Gly-CCC,0;tRNA-Gly-GCC-2-1,GCATTGGTGGTTCAGTGGTAGAATTCTCGCCTGCCACGCGGGAGGCCCGGGTTCGATTCCCGGCCAATGCACCA,Gly-GCC,0;tRNA-Gly-GCC-3-1,GCATTGGTGGTTCAGTGGTAGAATTCTCGCCTGCCACGCGGGAGGCCCGGGTTTGATTCCCGGCCAGTGCACCA,Gly-GCC,0;tRNA-Gly-GCC-5-1,GCATTGGTGGTTCAGTGGTAGAATTCTCGCCTGCCATGCGGGCGGCCGGGCTTCGATTCCTGGCCAATGCACCA,G…	0.208081	1.15515	0.818206	0.906473	16.6873	16.4792	79748.4	120859	220658	78895.5	71645	54227.5	66956.8	11525.4
tRF-1:31-chrM.Tyr-GTA	GGTAAAATGGCTGAGTGAAGCATTGGACTGT	tRF-5c	-	-	31	chrM.tRNA18-TyrGTA,GGTAAAATGGCTGAGTGAAGCATTGGACTGTAAATCTAAAGACAGGGGTTAGGCCTCTTTTTACCACCA,Tyr-GTA,0	0.21675	1.16211	0.901858	0.957252	2.68566	2.46891	5.26644	10.7698	6.25328	7.0056	0.609418	0.883866	1.43433	22.1227
tRF-1:32-Asp-GTC-2	TCCTCGTTAGTATAGTGGTGAGTATCCCCGCC	tRF-5c	5032c	-	32	tRNA-Asp-GTC-2-1,TCCTCGTTAGTATAGTGGTGAGTATCCCCGCCTGTCACGCGGGAGACCGGGGTTCGATTCCCCGACGGGGAGCCA,Asp-GTC,0	0.217878	1.16302	0.818232	0.906473	5.99966	5.78179	46.0814	26.9245	37.5197	107.419	41.4404	43.0148	36.8828	14.9478
tRF-+1:T32-Arg-CCT-2	TCGAGAGGGGCTGTGCTCGCAAGGTTTCTTTT	tRF-1	-	-	32	pre_tRNA-Arg-CCT-2-1,AACACCTATCAAGGAGCACGTGGGTTTAGCGTCTTACCGCGCCCCAGTGGCCTAATGGATAAGGCACTGGCCTCCTAAGCCAGGGATTGTGGGTTCGAGTCCCACCTGGGGTGTCGAGAGGGGCTGTGCTCGCAAGGTTTCTTTTGGTGCCGG,Arg-CCT,113	0.22366	1.16769	0.798446	0.896556	6.39124	6.16758	142.194	172.317	168.839	19.46	68.8642	32.9977	7.37655	188.342
tRF-1:16-Leu-TAA-1	ACCAGGATGGCCGAGT	tRF-5a	-	-	16	tRNA-Leu-TAA-1-1,ACCAGGATGGCCGAGTGGTTAAGGCGTTGGACTTAAGATCCAATGGACATATGTCCGCGTGGGTTCGAACCCCACTCCTGGTACCA,Leu-TAA,0	0.225128	1.16888	0.798917	0.896556	6.3485	6.12338	136.928	43.0792	50.0263	112.09	10.9695	131.991	26.6375	99.2534
tRF-56:77-Thr-AGT-1-M2	TCGAATCCCAGCGGTGCCTCCA	tRF-3b	-	tRF-22-WB86Q3P92	22	tRNA-Thr-AGT-1-1,GGCGCCGTGGCTTAGTTGGTTAAAGCGCCTGTCTAGTAAACAGGAGATCCTGGGTTCGAATCCCAGCGGTGCCTCCA,Thr-AGT,55;tRNA-Thr-AGT-5-1,GGCGCCGTGGCTTAGCTGGTTAAAGCGCCTGTCTAGTAAACAGGAGATCCTGGGTTCGAATCCCAGCGGTGCCTCCA,Thr-AGT,55	0.232537	1.1749	0.820522	0.906787	3.28557	3.05303	26.3322	37.6943	4.68996	0.7784	3.3518	3.83009	0.409808	32.8852
tiRNA-1:33-Gly-CCC-2	GCGCCGCTGGTGTAGTGGTATCATGCAAGATTC	tiRNA-5	-	tRF-33-Q1Q89P9L842205	33	tRNA-Gly-CCC-2-1,GCGCCGCTGGTGTAGTGGTATCATGCAAGATTCCCATTCTTGCGACCCGGGTTCGATTCCCGGGCGGCGCACCA,Gly-CCC,0	0.241988	1.18262	0.767236	0.875734	11.0522	10.8102	5732.52	3580.96	2904.65	785.406	1272.77	1542.05	1050.54	1295.68
tRF-1:32-Val-TAC-1	GGTTCCATAGTGTAGTGGTTATCACGTCTGCT	tRF-5c	-	tRF-32-R9JP9P9NH5SY3	32	tRNA-Val-TAC-1-1,GGTTCCATAGTGTAGTGGTTATCACGTCTGCTTTACACGCAGAAGGTCCTGGGTTCGAGCCCCAGTGGAACCACCA,Val-TAC,0	0.24391	1.1842	0.784511	0.88872	5.148	4.90409	64.5139	24.232	40.6463	35.8064	25.5955	27.6945	17.6218	10.1645
tRF-54:75-Asp-GTC-2-M2	TCGATTCCCCGACGGGGAGCCA	tRF-3b	3024b	tRF-22-WE8RO86J2	22	tRNA-Asp-GTC-2-1,TCCTCGTTAGTATAGTGGTGAGTATCCCCGCCTGTCACGCGGGAGACCGGGGTTCGATTCCCCGACGGGGAGCCA,Asp-GTC,53;tRNA-Asp-GTC-3-1,TCCTCGTTAGTATAGTGGTGAGTGTCCCCGTCTGTCACGCGGGAGACCGGGGTTCGATTCCCCGACGGGGAGCCA,Asp-GTC,53	0.259614	1.19716	0.808364	0.904407	3.07748	2.81787	21.0658	21.5396	1.56332	5.4488	1.21884	9.13328	1.02452	22.1227
tRF-+1:T18-Ala-CGC-2	AGGCGATCACGTAGATTT	tRF-1	-	-	18	pre_tRNA-Ala-CGC-2-1,TAACATGACAGGAATTCTCCGTTACAACCGACTTGTGCCAGGGGATGTAGCTCAGTGGTAGAGCGCATGCTTCGCATGTATGAGGCCCCGGGTTCGATCCCCGGCATCTCCAAGGCGATCACGTAGATTTTGTTTAATTCAGCCTCTGGAAC,Ala-CGC,112	0.266388	1.20279	0.7922	0.895186	3.01656	2.75017	47.398	8.07735	3.12664	0.7784	0.304709	2.6516	1.22943	29.2977
tRF-1:14-Gly-CCC-2	GCGCCGCTGGTGTA	tRF-5a	-	-	14	tRNA-Gly-CCC-2-1,GCGCCGCTGGTGTAGTGGTATCATGCAAGATTCCCATTCTTGCGACCCGGGTTCGATTCCCGGGCGGCGCACCA,Gly-CCC,0	0.286795	1.21993	0.754491	0.86722	5.80731	5.52051	214.608	64.6188	7.8166	42.0336	7.92243	96.9307	7.58146	104.635
tRF-1:32-Glu-TTC-1	TCCCATATGGTCTAGCGGTTAGGATTCCTGGT	tRF-5c	-	tRF-32-86V8WPMN1E8YN	32	tRNA-Glu-TTC-1-1,TCCCATATGGTCTAGCGGTTAGGATTCCTGGTTTTCACCCAGGTGGCCCGGGTTCGACTCCCGGTATGGGAACCA,Glu-TTC,0	0.288625	1.22148	0.75594	0.86722	8.76909	8.48046	184.325	560.03	353.31	550.329	184.958	240.412	329.486	36.4726
tRF-59:75-Ala-AGC-2-M4	CCCCGGCACCTCCACCA	tRF-3a	-	tRF-17-KSP1852	17	tRNA-Ala-AGC-2-1,GGGGGTGTAGCTCAGTGGTAGAGCGCGTGCTTAGCATGCACGAGGCCCCGGGTTCAATCCCCGGCACCTCCACCA,Ala-AGC,58;tRNA-Ala-AGC-3-1,GGGGGTGTAGCTCAGTGGTAGAGCGCGTGCTTAGCATGTACGAGGTCCCGGGTTCAATCCCCGGCACCTCCACCA,Ala-AGC,58;tRNA-Ala-TGC-1-1,GGGGGTGTAGCTCAGTGGTAGAGCGCATGCTTTGCATGTATGAGGTCCCGGGTTCGATCCCCGGCACCTCCACCA,Ala-TGC,58;tRNA-Ala-TGC-6-1,GGGGGTGTAGCTCAGTGGTAGAGCACATGCTTTGCATGTGTGAGGCCCCGGGTTCGATCCCCGGCACCTC…	0.28956	1.22227	0.747145	0.863707	4.7503	4.46074	110.595	56.5414	9.37992	7.0056	7.92243	40.0686	1.63923	57.3995
tiRNA-1:33-iMet-CAT-1-M2	AGCAGAGTGGCGCAGCGGAAGCGTGCTGGGCCC	tiRNA-5	-	tRF-33-FP18LPMBQ4NKDJ	33	tRNA-iMet-CAT-1-1,AGCAGAGTGGCGCAGCGGAAGCGTGCTGGGCCCATAACCCAGAGGTCGATGGATCGAAACCATCCTCTGCTACCA,iMet-CAT,0;tRNA-iMet-CAT-2-1,AGCAGAGTGGCGCAGCGGAAGCGTGCTGGGCCCATAACCCAGAGGTCGATGGATCTAAACCATCCTCTGCTACCA,iMet-CAT,0	0.296201	1.22791	0.750577	0.865461	5.40154	5.10534	129.028	21.5396	14.0699	44.3688	4.26592	21.802	9.22069	127.953
tRF-1:15-Lys-TTT-3-M2	GCCCGGATAGCTCAG	tRF-5a	-	-	15	tRNA-Lys-TTT-3-1,GCCCGGATAGCTCAGTCGGTAGAGCATCAGACTTTTAATCTGAGGGTCCAGGGTTCAAGTCCCTGTTCGGGCGCCA,Lys-TTT,0;tRNA-Lys-TTT-5-1,GCCCGGATAGCTCAGTCGGTAGAGCATCAGACTTTTAATCTGAGGGTCCGGGGTTCAAGTCCCTGTTCGGGCGCCA,Lys-TTT,0	0.312057	1.24148	0.743266	0.861427	3.94523	3.63318	13.1661	32.3094	6.25328	16.3464	4.87534	13.8472	1.84414	38.8643
tiRNA-1:34-Lys-CTT-1-M2	GCCCGGCTAGCTCAGTCGGTAGAGCATGGGACTC	tiRNA-5	-	tRF-34-PSQP4PW3FJIKE5	34	tRNA-Lys-CTT-1-1,GCCCGGCTAGCTCAGTCGGTAGAGCATGGGACTCTTAATCCCAGGGTCGTGGGTTCGAGCCCCACGTTGGGCGCCA,Lys-CTT,0;tRNA-Lys-CTT-4-1,GCCCGGCTAGCTCAGTCGGTAGAGCATGGGACTCTTAATCTCAGGGTCGTGGGTTCGAGCCCCACGTTGGGCGCCA,Lys-CTT,0	0.343808	1.2691	0.693616	0.820718	13.202	12.8582	4251.34	17215.5	12750.4	7013.39	2728.97	2244.43	4537.4	17604.3
tRF-1:31-Gly-GCC-4	GCATAGGTGGTTCAGTGGTAGAATTCTTGCC	tRF-5c	-	-	31	tRNA-Gly-GCC-4-1,GCATAGGTGGTTCAGTGGTAGAATTCTTGCCTGCCACGCAGGAGGCCCAGGTTTGATTCCTGGCCCATGCACCA,Gly-GCC,0	0.359367	1.28286	0.704408	0.831312	5.70669	5.34732	36.8651	51.1565	101.616	34.2496	33.518	23.2751	35.6533	3.58747
tRF-57:75-Ala-AGC-2-M4	ATCCCCGGCACCTCCACCA	tRF-3b	-	tRF-19-HRMF3RE2	19	tRNA-Ala-AGC-2-1,GGGGGTGTAGCTCAGTGGTAGAGCGCGTGCTTAGCATGCACGAGGCCCCGGGTTCAATCCCCGGCACCTCCACCA,Ala-AGC,56;tRNA-Ala-AGC-3-1,GGGGGTGTAGCTCAGTGGTAGAGCGCGTGCTTAGCATGTACGAGGTCCCGGGTTCAATCCCCGGCACCTCCACCA,Ala-AGC,56;tRNA-Ala-TGC-1-1,GGGGGTGTAGCTCAGTGGTAGAGCGCATGCTTTGCATGTATGAGGTCCCGGGTTCGATCCCCGGCACCTCCACCA,Ala-TGC,56;tRNA-Ala-TGC-6-1,GGGGGTGTAGCTCAGTGGTAGAGCACATGCTTTGCATGTGTGAGGCCCCGGGTTCGATCCCCGGCACCTC…	0.379699	1.30107	0.720157	0.841114	2.84368	2.46398	31.5987	13.4622	0	1.5568	1.21884	12.6687	0.409808	14.3499
tRF-1:32-Glu-TTC-2	TCCCACATGGTCTAGCGGTTAGGATTCCTGGT	tRF-5c	-	tRF-32-86J8WPMN1E8YN	32	tRNA-Glu-TTC-2-1,TCCCACATGGTCTAGCGGTTAGGATTCCTGGTTTTCACCCAGGCGGCCCGGGTTCGACTCCCGGTGTGGGAACCA,Glu-TTC,0	0.381064	1.3023	0.670757	0.806336	10.124	9.74296	858.43	1470.08	1191.25	1014.26	358.947	562.728	900.349	146.488
tRF-1:31-Val-TAC-1	GGTTCCATAGTGTAGTGGTTATCACGTCTGC	tRF-5c	5020c	tRF-31-R9JP9P9NH5SYD	31	tRNA-Val-TAC-1-1,GGTTCCATAGTGTAGTGGTTATCACGTCTGCTTTACACGCAGAAGGTCCTGGGTTCGAGCCCCAGTGGAACCACCA,Val-TAC,0	0.38821	1.30877	0.681921	0.812597	3.31319	2.92498	10.5329	2.69245	21.8865	6.2272	7.61772	8.54404	4.30299	3.58747
tRF-1:16-Ser-AGA-1-M7	GTAGTCGTGGCCGAGT	tRF-5a	-	tRF-16-S3M830E	16	tRNA-Ser-AGA-1-1,GTAGTCGTGGCCGAGTGGTTAAGGCGATGGACTAGAAATCCATTGGGGTTTCCCCGCGCAGGTTCGAATCCTGCCGACTACGCCA,Ser-AGA,0;tRNA-Ser-AGA-2-1,GTAGTCGTGGCCGAGTGGTTAAGGCGATGGACTAGAAATCCATTGGGGTCTCCCCGCGCAGGTTCGAATCCTGCCGACTACGCCA,Ser-AGA,0;tRNA-Ser-AGA-3-1,GTAGTCGTGGCCGAGTGGTTAAGGCGATGGACTAGAAATCCATTGGGGTTTCCCCACGCAGGTTCGAATCCTGCCGACTACGCCA,Ser-AGA,0;tRNA-Ser-AGA-4-1,GTAGTCGTGGCCGAGTGGTTAAGGTGATGGACTAGAAACCCAT…	0.39564	1.31553	0.659813	0.797421	5.85856	5.46292	140.877	37.6943	28.1398	55.2664	6.39888	68.0577	33.3994	43.6476
tRF-1:29-Glu-TTC-1	TCCCATATGGTCTAGCGGTTAGGATTCCT	tRF-5c	-	tRF-29-86V8WPMN1EJ3	29	tRNA-Glu-TTC-1-1,TCCCATATGGTCTAGCGGTTAGGATTCCTGGTTTTCACCCAGGTGGCCCGGGTTCGACTCCCGGTATGGGAACCA,Glu-TTC,0	0.401529	1.32091	0.657645	0.797421	6.1811	5.77957	64.5139	48.4641	42.2097	93.408	44.4875	40.9525	44.874	18.5353
tiRNA-1:35-Leu-CAG-1-M2	GTCAGGATGGCCGAGCGGTCTAAGGCGCTGCGTTC	tiRNA-5	-	tRF-35-SP5830MMUKLYM9	35	tRNA-Leu-CAG-1-1,GTCAGGATGGCCGAGCGGTCTAAGGCGCTGCGTTCAGGTCGCAGTCTCCCCTGGAGGCGTGGGTTCGAATCCCACTCCTGACACCA,Leu-CAG,0;tRNA-Leu-CAG-2-1,GTCAGGATGGCCGAGCGGTCTAAGGCGCTGCGTTCAGGTCGCAGTCTCCCCTGGAGGCGTGGGTTCGAATCCCACTTCTGACACCA,Leu-CAG,0	0.407743	1.32661	0.682433	0.812597	3.93519	3.52745	1.31661	13.4622	12.5066	20.2384	7.61772	8.83866	5.73732	22.7207
tRF-57:74-Gly-CCC-2	TTCCCGGGCGGCGCACCA	tRF-3a	-	tRF-18-YRRHQFD2	18	tRNA-Gly-CCC-2-1,GCGCCGCTGGTGTAGTGGTATCATGCAAGATTCCCATTCTTGCGACCCGGGTTCGATTCCCGGGCGGCGCACCA,Gly-CCC,56	0.412323	1.33083	0.658552	0.797421	3.56374	3.15142	31.5987	18.8471	10.9432	3.892	3.3518	12.6687	0.819617	30.4935
tiRNA-1:34-Arg-CCG-2	GACCCAGTGGCCTAATGGATAAGGCATCAGCCTC	tiRNA-5	-	-	34	tRNA-Arg-CCG-2-1,GACCCAGTGGCCTAATGGATAAGGCATCAGCCTCCGGAGCTGGGGATTGTGGGTTCGAGTCCCATCTGGGTCGCCA,Arg-CCG,0	0.435897	1.35275	0.62863	0.772122	3.93543	3.49953	13.1661	21.5396	15.6332	12.4544	8.22714	5.00857	7.58146	18.5353
tRF-60:76-Phe-GAA-1-M4	CCCGGGTTTCGGCACCA	tRF-3a	3023a	tRF-17-K879652	17	tRNA-Phe-GAA-1-1,GCCGAAATAGCTCAGTTGGGAGAGCGTTAGACTGAAGATCTAAAGGTCCCTGGTTCGATCCCGGGTTTCGGCACCA,Phe-GAA,59;tRNA-Phe-GAA-2-1,GCCGAAATAGCTCAGTTGGGAGAGCGTTAGACTGAAGATCTAAAGGTCCCTGGTTCAATCCCGGGTTTCGGCACCA,Phe-GAA,59;tRNA-Phe-GAA-3-1,GCCGAGATAGCTCAGTTGGGAGAGCGTTAGACTGAAGATCTAAAGGTCCCTGGTTCAATCCCGGGTTTCGGCACCA,Phe-GAA,59;tRNA-Phe-GAA-4-1,GCCGAAATAGCTCAGTTGGGAGAGCGTTAGACCGAAGATCTTAAAGGTCCCTGGTTCAATCCCGGGT…	0.453217	1.36909	0.596259	0.74041	5.936	5.48278	53.981	137.315	60.9695	31.9144	53.6287	88.9759	8.81088	40.0601
tiRNA-1:33-Pro-TGG-3	GGCTCGTTGGTCTAGGGGTATGATTCTCGCTTT	tiRNA-5	-	-	33	tRNA-Pro-TGG-3-1,GGCTCGTTGGTCTAGGGGTATGATTCTCGCTTTGGGTGCGAGAGGTCCCGGGTTCAAATCCCGGACGAGCCCCCA,Pro-TGG,0	0.461645	1.37711	0.595751	0.74041	6.20703	5.74539	227.774	29.6169	46.8996	52.1528	30.7756	15.0257	37.2926	114.799
tRF-1:16-Gly-CCC-1-M4	GCATTGGTGGTTCAGT	tRF-5a	-	tRF-16-PNR8YPE	16	tRNA-Gly-CCC-1-1,GCATTGGTGGTTCAGTGGTAGAATTCTCGCCTCCCACGCGGGAGACCCGGGTTCAATTCCCGGCCAATGCACCA,Gly-CCC,0;tRNA-Gly-GCC-2-1,GCATTGGTGGTTCAGTGGTAGAATTCTCGCCTGCCACGCGGGAGGCCCGGGTTCGATTCCCGGCCAATGCACCA,Gly-GCC,0;tRNA-Gly-GCC-3-1,GCATTGGTGGTTCAGTGGTAGAATTCTCGCCTGCCACGCGGGAGGCCCGGGTTTGATTCCCGGCCAGTGCACCA,Gly-GCC,0;tRNA-Gly-GCC-5-1,GCATTGGTGGTTCAGTGGTAGAATTCTCGCCTGCCATGCGGGCGGCCGGGCTTCGATTCCTGGCCAATGCACCA,G…	0.482894	1.39754	0.584734	0.734166	6.13739	5.65449	60.5641	64.6188	37.5197	79.3968	14.0166	96.636	9.6305	152.468
tRF-1:16-Leu-CAA-1-M4	GTCAGGATGGCCGAGT	tRF-5a	-	-	16	tRNA-Leu-CAA-1-1,GTCAGGATGGCCGAGTGGTCTAAGGCGCCAGACTCAAGTTCTGGTCTCCAATGGAGGCGTGGGTTCGAATCCCACTTCTGACACCA,Leu-CAA,0;tRNA-Leu-CAA-2-1,GTCAGGATGGCCGAGTGGTCTAAGGCGCCAGACTCAAGTTCTGGTCTCCGTATGGAGGCGTGGGTTCGAATCCCACTTCTGACACCA,Leu-CAA,0;tRNA-Leu-CAA-3-1,GTCAGGATGGCCGAGTGGTCTAAGGCGCCAGACTCAAGTTCTGGTCTCCGCATGGAGGCGTGGGTTCGAATCCCACTTCTGACACCA,Leu-CAA,0;tRNA-Leu-CAA-4-1,GTCAGGATGGCCGAGTGGTCTAAGGCGCCAGACTCAAG…	0.486305	1.40085	0.579805	0.730005	5.43624	4.94993	152.727	24.232	15.6332	27.244	7.0083	45.961	9.42559	98.0576
tiRNA-1:34-Glu-CTC-1-M2	TCCCTGGTGGTCTAGTGGTTAGGATTCGGCGCTC	tiRNA-5	-	tRF-34-87R8WP9N1EWJI5	34	tRNA-Glu-CTC-1-1,TCCCTGGTGGTCTAGTGGTTAGGATTCGGCGCTCTCACCGCCGCGGCCCGGGTTCGATTCCCGGTCAGGGAACCA,Glu-CTC,0;tRNA-Glu-CTC-2-1,TCCCTGGTGGTCTAGTGGTTAGGATTCGGCGCTCTCACCGCCGCGGCCCGGGTTCGATTCCCGGTCAGGAAACCA,Glu-CTC,0	0.5128	1.42682	0.535266	0.687331	11.9999	11.4871	13318.8	4097.91	2735.81	1626.86	1142.66	3276.79	1688.21	6250.57
tRF-1:32-Val-CAC-3	GTTTCCGTAGTGTAGCGGTTATCACATTCGCC	tRF-5c	-	tRF-32-79MP9PMNH5ISJ	32	tRNA-Val-CAC-3-1,GTTTCCGTAGTGTAGCGGTTATCACATTCGCCTCACACGCGAAAGGTCCCCGGTTCGATCCCGGGCGGAAACACCA,Val-CAC,0	0.52119	1.43514	0.526915	0.680473	7.54474	7.02355	360.751	344.634	212.612	42.0336	49.3628	255.732	80.7323	150.674
tRF-+1:T14-Ile-AAT-5-5	GGATTGAAACTTTT	tRF-1	-	-	14	pre_tRNA-Ile-AAT-5-5,TGTAACTAAATAGATTTATTTCAAGCTTTTCGTAGCAACTGGCCGGTTAGCTCAGTTGGTTAGAGCGTGGTGCTAATAACGCCAAGGTCGCGGGTTCGATCCCCGTACGGGCCAGGATTGAAACTTTTCGAAAGTACGATTACTGCACTCCGTT,Ile-AAT,114	0.535869	1.44981	0.595187	0.74041	3.29953	2.76366	23.699	5.3849	10.9432	4.6704	2.74238	2.94622	0.204904	36.4726
tRF-58:75-Pro-AGG-1-M7	ATCCCGGACGAGCCCCCA	tRF-3a	3002a	tRF-18-HR6HFRD2	18	tRNA-Pro-AGG-1-1,GGCTCGTTGGTCTAGGGGTATGATTCTCGCTTAGGATGCGAGAGGTCCCGGGTTCAAATCCCGGACGAGCCCCCA,Pro-AGG,57;tRNA-Pro-AGG-2-1,GGCTCGTTGGTCTAGGGGTATGATTCTCGCTTAGGGTGCGAGAGGTCCCGGGTTCAAATCCCGGACGAGCCCCCA,Pro-AGG,57;tRNA-Pro-CGG-1-1,GGCTCGTTGGTCTAGGGGTATGATTCTCGCTTCGGGTGCGAGAGGTCCCGGGTTCAAATCCCGGACGAGCCCCCA,Pro-CGG,57;tRNA-Pro-CGG-2-1,GGCTCGTTGGTCTAGGGGTATGATTCTCGCTTCGGGTGTGAGAGGTCCCGGGTTCAAATCCCGGACGAGC…	0.540327	1.4543	0.520041	0.67352	7.52062	6.98029	595.108	258.475	103.179	51.3744	113.656	283.132	12.2943	258.298
tRF-1:31-Gly-CCC-2	GCGCCGCTGGTGTAGTGGTATCATGCAAGAT	tRF-5c	-	-	31	tRNA-Gly-CCC-2-1,GCGCCGCTGGTGTAGTGGTATCATGCAAGATTCCCATTCTTGCGACCCGGGTTCGATTCCCGGGCGGCGCACCA,Gly-CCC,0	0.541251	1.45523	0.549148	0.699197	4.2495	3.70825	51.3478	16.1547	17.1965	7.784	5.18005	15.9096	14.1384	2.39165
tRF-1:16-Leu-CAA-6-M3	GTCAGGATGGCCGAGC	tRF-5a	5023a	tRF-16-SP5830D	16	tRNA-Leu-CAA-6-1,GTCAGGATGGCCGAGCAGTCTTAAGGCGCTGCGTTCAAATCGCACCCTCCGCTGGAGGCGTGGGTTCGAATCCCACTTTTGACACCA,Leu-CAA,0;tRNA-Leu-CAG-1-1,GTCAGGATGGCCGAGCGGTCTAAGGCGCTGCGTTCAGGTCGCAGTCTCCCCTGGAGGCGTGGGTTCGAATCCCACTCCTGACACCA,Leu-CAG,0;tRNA-Leu-CAG-2-1,GTCAGGATGGCCGAGCGGTCTAAGGCGCTGCGTTCAGGTCGCAGTCTCCCCTGGAGGCGTGGGTTCGAATCCCACTTCTGACACCA,Leu-CAG,0	0.5678	1.48226	0.508702	0.662632	5.50737	4.93957	121.128	45.7716	18.7598	26.4656	6.09418	61.2814	13.5237	75.3369
tRF-1:31-Pro-AGG-1-M5	GGCTCGTTGGTCTAGGGGTATGATTCTCGCT	tRF-5c	-	tRF-31-6978WPRLXN4VE	31	tRNA-Pro-AGG-1-1,GGCTCGTTGGTCTAGGGGTATGATTCTCGCTTAGGATGCGAGAGGTCCCGGGTTCAAATCCCGGACGAGCCCCCA,Pro-AGG,0;tRNA-Pro-AGG-2-1,GGCTCGTTGGTCTAGGGGTATGATTCTCGCTTAGGGTGCGAGAGGTCCCGGGTTCAAATCCCGGACGAGCCCCCA,Pro-AGG,0;tRNA-Pro-CGG-1-1,GGCTCGTTGGTCTAGGGGTATGATTCTCGCTTCGGGTGCGAGAGGTCCCGGGTTCAAATCCCGGACGAGCCCCCA,Pro-CGG,0;tRNA-Pro-CGG-2-1,GGCTCGTTGGTCTAGGGGTATGATTCTCGCTTCGGGTGTGAGAGGTCCCGGGTTCAAATCCCGGACGAGCCCC…	0.589836	1.50508	0.475507	0.630291	6.64687	6.05703	196.175	56.5414	142.262	41.2552	82.5761	50.0857	39.3416	84.3056
tRF-1:30-Glu-TTC-3-M2	TCCCTGGTGGTCTAGTGGCTAGGATTCGGC	tRF-5c	-	tRF-30-87R8WP9I1EWJ	30	tRNA-Glu-TTC-3-1,TCCCTGGTGGTCTAGTGGCTAGGATTCGGCGCTTTCACCGCCGCGGCCCGGGTTCGATTCCCGGCCAGGGAACCA,Glu-TTC,0;tRNA-Glu-TTC-4-1,TCCCTGGTGGTCTAGTGGCTAGGATTCGGCGCTTTCACCGCCGCGGCCCGGGTTCGATTCCCGGTCAGGGAACCA,Glu-TTC,0	0.639775	1.55809	0.455216	0.612582	4.81719	4.17742	44.7648	26.9245	12.5066	21.7952	9.14126	41.8363	11.6795	17.3394
tRF-1:32-Gly-CCC-2	GCGCCGCTGGTGTAGTGGTATCATGCAAGATT	tRF-5c	-	tRF-32-Q1Q89P9L8422Q	32	tRNA-Gly-CCC-2-1,GCGCCGCTGGTGTAGTGGTATCATGCAAGATTCCCATTCTTGCGACCCGGGTTCGATTCCCGGGCGGCGCACCA,Gly-CCC,0	0.640048	1.55838	0.467837	0.623783	12.0812	11.4412	13645.4	2902.46	1652.43	2198.2	1685.95	5908.06	2306.61	614.654
tRF-1:16-Glu-CTC-1-M4	TCCCTGGTGGTCTAGT	tRF-5a	-	tRF-16-87R8WPE	16	tRNA-Glu-CTC-1-1,TCCCTGGTGGTCTAGTGGTTAGGATTCGGCGCTCTCACCGCCGCGGCCCGGGTTCGATTCCCGGTCAGGGAACCA,Glu-CTC,0;tRNA-Glu-CTC-2-1,TCCCTGGTGGTCTAGTGGTTAGGATTCGGCGCTCTCACCGCCGCGGCCCGGGTTCGATTCCCGGTCAGGAAACCA,Glu-CTC,0;tRNA-Glu-TTC-3-1,TCCCTGGTGGTCTAGTGGCTAGGATTCGGCGCTTTCACCGCCGCGGCCCGGGTTCGATTCCCGGCCAGGGAACCA,Glu-TTC,0;tRNA-Glu-TTC-4-1,TCCCTGGTGGTCTAGTGGCTAGGATTCGGCGCTTTCACCGCCGCGGCCCGGGTTCGATTCCCGGTCAGGGAAC…	0.680599	1.60281	0.432815	0.592826	6.54627	5.86567	119.812	64.6188	50.0263	79.3968	14.9307	79.548	20.4904	234.979
tRF-1:16-Glu-TTC-2	TCCCACATGGTCTAGC	tRF-5a	-	tRF-16-86J8WPD	16	tRNA-Glu-TTC-2-1,TCCCACATGGTCTAGCGGTTAGGATTCCTGGTTTTCACCCAGGCGGCCCGGGTTCGACTCCCGGTGTGGGAACCA,Glu-TTC,0	0.707323	1.63277	0.484465	0.636565	3.42041	2.71309	14.4827	13.4622	3.12664	7.784	1.21884	5.89244	2.86866	29.2977
tRF-58:75-Glu-TTC-2	CTCCCGGTGTGGGAACCA	tRF-3a	-	-	18	tRNA-Glu-TTC-2-1,TCCCACATGGTCTAGCGGTTAGGATTCCTGGTTTTCACCCAGGCGGCCCGGGTTCGACTCCCGGTGTGGGAACCA,Glu-TTC,57	0.712593	1.63875	0.422864	0.58451	4.63588	3.92329	11.8495	32.3094	37.5197	9.3408	21.6343	29.4622	6.35203	12.5562
tRF-1:30-Gly-CCC-3	GCATTGGTGGTTCAATGGTAGAATTCTCGC	tRF-5c	-	tRF-30-PNR8YO9LON4V	30	tRNA-Gly-CCC-3-1,GCATTGGTGGTTCAATGGTAGAATTCTCGCCTCCCACGCAGGAGACCCAGGTTCGATTCCTGGCCAATGCACCA,Gly-CCC,0	0.746369	1.67756	0.441194	0.602476	4.48808	3.74171	11.8495	2.69245	40.6463	12.4544	12.7978	22.3913	12.7041	1.19582
tRF-1:32-Glu-TTC-3-M2	TCCCTGGTGGTCTAGTGGCTAGGATTCGGCGC	tRF-5c	-	tRF-32-87R8WP9I1EWJM	32	tRNA-Glu-TTC-3-1,TCCCTGGTGGTCTAGTGGCTAGGATTCGGCGCTTTCACCGCCGCGGCCCGGGTTCGATTCCCGGCCAGGGAACCA,Glu-TTC,0;tRNA-Glu-TTC-4-1,TCCCTGGTGGTCTAGTGGCTAGGATTCGGCGCTTTCACCGCCGCGGCCCGGGTTCGATTCCCGGTCAGGGAACCA,Glu-TTC,0	0.758047	1.6912	0.372346	0.537314	7.03125	6.2732	321.253	102.313	43.773	69.2776	53.0193	181.487	63.5203	35.8747
tRF-1:31-Val-AAC-1-M6	GTTTCCGTAGTGTAGTGGTTATCACGTTCGC	tRF-5c	5027c	tRF-31-79MP9P9NH57SD	31	tRNA-Val-AAC-1-1,GTTTCCGTAGTGTAGTGGTTATCACGTTCGCCTAACACGCGAAAGGTCCCCGGTTCGAAACCGGGCGGAAACACCA,Val-AAC,0;tRNA-Val-AAC-3-1,GTTTCCGTAGTGTAGTGGTTATCACGTTCGCCTAACACGCGAAAGGTCCCTGGATCAAAACCAGGCGGAAACACCA,Val-AAC,0;tRNA-Val-AAC-4-1,GTTTCCGTAGTGTAGTGGTTATCACGTTCGCCTAACACGCGAAAGGTCCGCGGTTCGAAACCGGGCGGAAACACCA,Val-AAC,0;tRNA-Val-CAC-1-1,GTTTCCGTAGTGTAGTGGTTATCACGTTCGCCTCACACGCGAAAGGTCCCCGGTTCGAAACCGGGCGGAA…	0.797001	1.73749	0.373267	0.537314	5.5217	4.72469	72.4136	51.1565	31.2664	20.2384	7.31301	73.0663	26.2277	8.37077
tRF-1:30-Val-AAC-1-M6	GTTTCCGTAGTGTAGTGGTTATCACGTTCG	tRF-5c	-	tRF-30-79MP9P9NH57S	30	tRNA-Val-AAC-1-1,GTTTCCGTAGTGTAGTGGTTATCACGTTCGCCTAACACGCGAAAGGTCCCCGGTTCGAAACCGGGCGGAAACACCA,Val-AAC,0;tRNA-Val-AAC-3-1,GTTTCCGTAGTGTAGTGGTTATCACGTTCGCCTAACACGCGAAAGGTCCCTGGATCAAAACCAGGCGGAAACACCA,Val-AAC,0;tRNA-Val-AAC-4-1,GTTTCCGTAGTGTAGTGGTTATCACGTTCGCCTAACACGCGAAAGGTCCGCGGTTCGAAACCGGGCGGAAACACCA,Val-AAC,0;tRNA-Val-CAC-1-1,GTTTCCGTAGTGTAGTGGTTATCACGTTCGCCTCACACGCGAAAGGTCCCCGGTTCGAAACCGGGCGGAA…	0.809657	1.75279	0.405099	0.569566	3.68268	2.87302	56.6143	5.3849	4.68996	0	4.26592	25.0429	5.12261	1.19582
tRF-1:29-Glu-TTC-2	TCCCACATGGTCTAGCGGTTAGGATTCCT	tRF-5c	-	tRF-29-86J8WPMN1EJ3	29	tRNA-Glu-TTC-2-1,TCCCACATGGTCTAGCGGTTAGGATTCCTGGTTTTCACCCAGGCGGCCCGGGTTCGACTCCCGGTGTGGGAACCA,Glu-TTC,0	0.819914	1.7653	0.341757	0.503174	7.6031	6.78319	161.943	113.083	123.502	155.68	112.438	117.26	117.82	64.5745
tRF-1:16-Ser-GCT-1-M5	GACGAGGTGGCCGAGT	tRF-5a	-	tRF-16-OUR830E	16	tRNA-Ser-GCT-1-1,GACGAGGTGGCCGAGTGGTTAAGGCGATGGACTGCTAATCCATTGTGCTCTGCACGCGTGGGTTCGAATCCCACCCTCGTCGCCA,Ser-GCT,0;tRNA-Ser-GCT-2-1,GACGAGGTGGCCGAGTGGTTAAGGCGATGGACTGCTAATCCATTGTGCTCTGCACGCGTGGGTTCGAATCCCACCTTCGTCGCCA,Ser-GCT,0;tRNA-Ser-GCT-3-1,GACGAGGTGGCCGAGTGGTTAAGGCGATGGACTGCTAATCCATTGTGCTTTGCACGCGTGGGTTCGAATCCCATCCTCGTCGCCA,Ser-GCT,0;tRNA-Ser-GCT-4-1,GACGAGGTGGCCGAGTGGTTAAGGCGATGGACTGCTAATCCAT…	0.820543	1.76607	0.387189	0.555585	5.36673	4.54619	67.1471	8.07735	6.25328	38.92	4.57063	59.219	23.9738	17.3394
tRF-29:42-Asn-GTT-1-M6	TCGGCTGTTAACCG	tRF-2	-	-	14	tRNA-Asn-GTT-1-1,GTCTCTGTGGCGCAATCGGTTAGCGCGTTCGGCTGTTAACCGAAAGGTTGGTGGTTCGATCCCACCCAGGGACGCCA,Asn-GTT,28;tRNA-Asn-GTT-2-1,GTCTCTGTGGCGCAATCGGTTAGCGCGTTCGGCTGTTAACCGAAAGGTTGGTGGTTCGAGCCCACCCAGGGACGCCA,Asn-GTT,28;tRNA-Asn-GTT-3-1,GTCTCTGTGGCGCAATCGGTTAGCGCATTCGGCTGTTAACCGAAAGGTTGGTGGTTCGAGCCCACCCAGGGACGCCA,Asn-GTT,28;tRNA-Asn-GTT-4-1,GTCTCTGTGGCGCAATCGGTTAGCGCGTTCGGCTGTTAACCGAAAGATTGGTGGTTCGAGCCCA…	0.826353	1.7732	0.39641	0.565781	3.3054	2.47905	38.1817	8.07735	1.56332	0.7784	1.21884	20.3289	0.614713	17.3394
tRF-1:30-Gly-CCC-1-M4	GCATTGGTGGTTCAGTGGTAGAATTCTCGC	tRF-5c	-	tRF-30-PNR8YP9LON4V	30	tRNA-Gly-CCC-1-1,GCATTGGTGGTTCAGTGGTAGAATTCTCGCCTCCCACGCGGGAGACCCGGGTTCAATTCCCGGCCAATGCACCA,Gly-CCC,0;tRNA-Gly-GCC-2-1,GCATTGGTGGTTCAGTGGTAGAATTCTCGCCTGCCACGCGGGAGGCCCGGGTTCGATTCCCGGCCAATGCACCA,Gly-GCC,0;tRNA-Gly-GCC-3-1,GCATTGGTGGTTCAGTGGTAGAATTCTCGCCTGCCACGCGGGAGGCCCGGGTTTGATTCCCGGCCAGTGCACCA,Gly-GCC,0;tRNA-Gly-GCC-5-1,GCATTGGTGGTTCAGTGGTAGAATTCTCGCCTGCCATGCGGGCGGCCGGGCTTCGATTCCTGGCCAATGCACCA,G…	0.883118	1.84436	0.34082	0.503174	14.9098	14.0267	15272.7	9787.05	53848.6	11875.3	18893.5	24037.3	18384.2	2701.37
tiRNA-1:34-Val-TAC-2	GGTTCCATAGTGTAGCGGTTATCACGTCTGCTTT	tiRNA-5	-	-	34	tRNA-Val-TAC-2-1,GGTTCCATAGTGTAGCGGTTATCACGTCTGCTTTACACGCAGAAGGTCCTGGGTTCGAGCCCCAGTGGAACCACCA,Val-TAC,0	0.896588	1.86166	0.291199	0.450332	6.21416	5.31757	44.7648	72.6961	81.2927	32.6928	70.083	36.5331	24.9983	62.1828
tRF-+1:T17-Arg-CCT-3	AAGAAAGGCCGAATTTT	tRF-1	-	-	17	pre_tRNA-Arg-CCT-3-1,GAGAAACTGGTCTAAGACAAGCGACAGCGTTTTGTTATCCGCCCCGGTGGCCTAATGGATAAGGCATTGGCCTCCTAAGCCAGGGATTGTGGGTTCGAGTCCCACCCGGGGTAAAGAAAGGCCGAATTTTAGTGTTCCTTATCGGGCAGAAGA,Arg-CCT,113	0.930802	1.90633	0.40443	0.569566	2.95617	2.02537	10.5329	10.7698	7.8166	0.7784	2.43767	1.17849	0.204904	29.2977
tiRNA-1:34-Glu-TTC-3-M2	TCCCTGGTGGTCTAGTGGCTAGGATTCGGCGCTT	tiRNA-5	-	tRF-34-87R8WP9I1EWJIQ	34	tRNA-Glu-TTC-3-1,TCCCTGGTGGTCTAGTGGCTAGGATTCGGCGCTTTCACCGCCGCGGCCCGGGTTCGATTCCCGGCCAGGGAACCA,Glu-TTC,0;tRNA-Glu-TTC-4-1,TCCCTGGTGGTCTAGTGGCTAGGATTCGGCGCTTTCACCGCCGCGGCCCGGGTTCGATTCCCGGTCAGGGAACCA,Glu-TTC,0	0.94219	1.92144	0.251816	0.413452	9.62342	8.68123	1916.99	506.181	384.577	257.651	280.942	664.078	297.111	1157.56
tRF-1:30-Gly-GCC-4	GCATAGGTGGTTCAGTGGTAGAATTCTTGC	tRF-5c	-	-	30	tRNA-Gly-GCC-4-1,GCATAGGTGGTTCAGTGGTAGAATTCTTGCCTGCCACGCAGGAGGCCCAGGTTTGATTCCTGGCCCATGCACCA,Gly-GCC,0	0.957422	1.94184	0.299161	0.456827	4.70414	3.74672	19.7492	10.7698	35.9564	10.1192	14.0166	20.9182	16.3923	2.39165
tRF-1:32-His-GTG-1	GCCGTGATCGTATAGTGGTTAGTACTCTGCGT	tRF-5c	-	tRF-32-PW5SVP9N15WVN	32	tRNA-His-GTG-1-1,GCCGTGATCGTATAGTGGTTAGTACTCTGCGTTGTGGCCGCAGCAACCTCGGTTCGAATCCGAGTCACGGCACCA,His-GTG,0	0.958532	1.94333	0.310906	0.466876	9.37844	8.41991	308.087	172.317	265.765	646.072	400.997	489.956	412.882	44.2455
tiRNA-1:34-Lys-CTT-7	GCCCAGCTAGCTCAGTCGGTAGAGCATGAGACTC	tiRNA-5	-	-	34	tRNA-Lys-CTT-7-1,GCCCAGCTAGCTCAGTCGGTAGAGCATGAGACTCTTAATCTCAGGGTCATGGGTTTGAGCCCCACGTTTGGTGCCA,Lys-CTT,0	0.961402	1.9472	0.284913	0.444529	4.35644	3.39504	5.26644	26.9245	18.7598	9.3408	12.1884	8.83866	4.50789	43.0497
tRF-1:15-Gly-CCC-1-M4	GCATTGGTGGTTCAG	tRF-5a	-	-	15	tRNA-Gly-CCC-1-1,GCATTGGTGGTTCAGTGGTAGAATTCTCGCCTCCCACGCGGGAGACCCGGGTTCAATTCCCGGCCAATGCACCA,Gly-CCC,0;tRNA-Gly-GCC-2-1,GCATTGGTGGTTCAGTGGTAGAATTCTCGCCTGCCACGCGGGAGGCCCGGGTTCGATTCCCGGCCAATGCACCA,Gly-GCC,0;tRNA-Gly-GCC-3-1,GCATTGGTGGTTCAGTGGTAGAATTCTCGCCTGCCACGCGGGAGGCCCGGGTTTGATTCCCGGCCAGTGCACCA,Gly-GCC,0;tRNA-Gly-GCC-5-1,GCATTGGTGGTTCAGTGGTAGAATTCTCGCCTGCCATGCGGGCGGCCGGGCTTCGATTCCTGGCCAATGCACCA,G…	0.985164	1.97954	0.262525	0.422282	4.43073	3.44557	23.699	18.8471	17.1965	8.5624	7.61772	45.3718	1.02452	28.6998
tRF-1:14-Gly-CCC-1-M5	GCATTGGTGGTTCA	tRF-5a	-	-	14	tRNA-Gly-CCC-1-1,GCATTGGTGGTTCAGTGGTAGAATTCTCGCCTCCCACGCGGGAGACCCGGGTTCAATTCCCGGCCAATGCACCA,Gly-CCC,0;tRNA-Gly-CCC-3-1,GCATTGGTGGTTCAATGGTAGAATTCTCGCCTCCCACGCAGGAGACCCAGGTTCGATTCCTGGCCAATGCACCA,Gly-CCC,0;tRNA-Gly-GCC-2-1,GCATTGGTGGTTCAGTGGTAGAATTCTCGCCTGCCACGCGGGAGGCCCGGGTTCGATTCCCGGCCAATGCACCA,Gly-GCC,0;tRNA-Gly-GCC-3-1,GCATTGGTGGTTCAGTGGTAGAATTCTCGCCTGCCACGCGGGAGGCCCGGGTTTGATTCCCGGCCAGTGCACCA,G…	1.0219	2.03059	0.27176	0.43252	4.77125	3.74935	32.9153	26.9245	9.37992	14.0112	1.82825	45.961	1.84414	63.9766
tRF-+1:T14-Asp-GTC-2-6	GAGGCTTAAACTTT	tRF-1	-	-	14	pre_tRNA-Asp-GTC-2-6,CTTCACAGGGATTTCCTAAGAGCTCCATTTTCACGTCAATTCCTCGTTAGTATAGTGGTGAGTATCCCCGCCTGTCACGCGGGAGACCGGGGTTCGATTCCCCGACGGGGAGGAGGCTTAAACTTTTTTTTAGAAAAGCACACTTCCGGTAA,Asp-GTC,112	1.03626	2.0509	0.285206	0.444529	7.57859	6.54233	107.962	223.473	262.638	24.1304	19.1967	83.9673	3.27847	757.554
tRF-1:29-Gly-TCC-1	GCGTTGGTGGTATAGTGGTTAGCATAGCT	tRF-5c	-	tRF-29-QNR8VP9NFQEW	29	tRNA-Gly-TCC-1-1,GCGTTGGTGGTATAGTGGTTAGCATAGCTGCCTTCCAAGCAGTTGACCCGGGTTCGATTCCCGGCCAACGCACCA,Gly-TCC,0	1.05172	2.07301	0.237381	0.401673	5.37494	4.32321	52.6644	21.5396	9.37992	28.0224	20.4155	58.0405	18.6463	9.56659
tRF-1:32-iMet-CAT-1-M2	AGCAGAGTGGCGCAGCGGAAGCGTGCTGGGCC	tRF-5c	-	tRF-32-FP18LPMBQ4NKJ	32	tRNA-iMet-CAT-1-1,AGCAGAGTGGCGCAGCGGAAGCGTGCTGGGCCCATAACCCAGAGGTCGATGGATCGAAACCATCCTCTGCTACCA,iMet-CAT,0;tRNA-iMet-CAT-2-1,AGCAGAGTGGCGCAGCGGAAGCGTGCTGGGCCCATAACCCAGAGGTCGATGGATCTAAACCATCCTCTGCTACCA,iMet-CAT,0	1.07198	2.10231	0.231455	0.400834	7.03018	5.9582	304.137	21.5396	10.9432	74.7264	46.3157	202.405	37.0877	135.128
tRF-1:15-Leu-CAA-1-M7	GTCAGGATGGCCGAG	tRF-5a	-	-	15	tRNA-Leu-CAA-1-1,GTCAGGATGGCCGAGTGGTCTAAGGCGCCAGACTCAAGTTCTGGTCTCCAATGGAGGCGTGGGTTCGAATCCCACTTCTGACACCA,Leu-CAA,0;tRNA-Leu-CAA-2-1,GTCAGGATGGCCGAGTGGTCTAAGGCGCCAGACTCAAGTTCTGGTCTCCGTATGGAGGCGTGGGTTCGAATCCCACTTCTGACACCA,Leu-CAA,0;tRNA-Leu-CAA-3-1,GTCAGGATGGCCGAGTGGTCTAAGGCGCCAGACTCAAGTTCTGGTCTCCGCATGGAGGCGTGGGTTCGAATCCCACTTCTGACACCA,Leu-CAA,0;tRNA-Leu-CAA-4-1,GTCAGGATGGCCGAGTGGTCTAAGGCGCCAGACTCAAG…	1.0979	2.14042	0.233954	0.401425	4.22102	3.12312	28.9654	21.5396	3.12664	7.0056	2.13296	13.5526	2.25395	58.5954
tRF-53:74-Gly-CCC-2	TCGATTCCCGGGCGGCGCACCA	tRF-3b	-	tRF-22-WE8S68L52	22	tRNA-Gly-CCC-2-1,GCGCCGCTGGTGTAGTGGTATCATGCAAGATTCCCATTCTTGCGACCCGGGTTCGATTCCCGGGCGGCGCACCA,Gly-CCC,52	1.10487	2.15079	0.256955	0.419291	3.95971	2.85484	31.5987	18.8471	3.12664	3.1136	0.609418	18.8558	0.819617	46.6371
tRF-58:74-Pro-AGG-1-M7-16:C>A	ATCCCGGACGAGCCCCA	tRF-3a	-	-	17	tRNA-Pro-AGG-1-1,GGCTCGTTGGTCTAGGGGTATGATTCTCGCTTAGGATGCGAGAGGTCCCGGGTTCAAATCCCGGACGAGCCCCCA,Pro-AGG,57;tRNA-Pro-AGG-2-1,GGCTCGTTGGTCTAGGGGTATGATTCTCGCTTAGGGTGCGAGAGGTCCCGGGTTCAAATCCCGGACGAGCCCCCA,Pro-AGG,57;tRNA-Pro-CGG-1-1,GGCTCGTTGGTCTAGGGGTATGATTCTCGCTTCGGGTGCGAGAGGTCCCGGGTTCAAATCCCGGACGAGCCCCCA,Pro-CGG,57;tRNA-Pro-CGG-2-1,GGCTCGTTGGTCTAGGGGTATGATTCTCGCTTCGGGTGTGAGAGGTCCCGGGTTCAAATCCCGGACGAGC…	1.11668	2.16848	0.252462	0.413452	3.27266	2.15598	35.5485	2.69245	0	0.7784	6.09418	10.3118	0.409808	19.1332
tRF-1:31-iMet-CAT-1-M2	AGCAGAGTGGCGCAGCGGAAGCGTGCTGGGC	tRF-5c	-	tRF-31-FP18LPMBQ4NKD	31	tRNA-iMet-CAT-1-1,AGCAGAGTGGCGCAGCGGAAGCGTGCTGGGCCCATAACCCAGAGGTCGATGGATCGAAACCATCCTCTGCTACCA,iMet-CAT,0;tRNA-iMet-CAT-2-1,AGCAGAGTGGCGCAGCGGAAGCGTGCTGGGCCCATAACCCAGAGGTCGATGGATCTAAACCATCCTCTGCTACCA,iMet-CAT,0	1.14677	2.21418	0.185987	0.344534	8.23153	7.08476	576.675	107.698	65.6595	147.118	69.7783	589.833	98.7638	185.353
tRF-1:32-His-GTG-2	GCCATGATCGTATAGTGGTTAGTACTCTGCGC	tRF-5c	-	-	32	tRNA-His-GTG-2-1,GCCATGATCGTATAGTGGTTAGTACTCTGCGCTGTGGCCGCAGCAACCTCGGTTCGAATCCGAGTCACGGCACCA,His-GTG,0	1.17453	2.2572	0.230094	0.40001	5.97059	4.79605	26.3322	10.7698	18.7598	54.488	31.6897	56.2728	38.9318	4.7833
tRF-1:32-Gly-CCC-3	GCATTGGTGGTTCAATGGTAGAATTCTCGCCT	tRF-5c	-	tRF-32-PNR8YO9LON4V3	32	tRNA-Gly-CCC-3-1,GCATTGGTGGTTCAATGGTAGAATTCTCGCCTCCCACGCAGGAGACCCAGGTTCGATTCCTGGCCAATGCACCA,Gly-CCC,0	1.19434	2.2884	0.208293	0.372127	8.77255	7.57821	129.028	137.315	175.092	345.61	251.08	170.292	315.962	44.2455
tRF-1:32-Gly-CCC-1-M4	GCATTGGTGGTTCAGTGGTAGAATTCTCGCCT	tRF-5c	-	tRF-32-PNR8YP9LON4V3	32	tRNA-Gly-CCC-1-1,GCATTGGTGGTTCAGTGGTAGAATTCTCGCCTCCCACGCGGGAGACCCGGGTTCAATTCCCGGCCAATGCACCA,Gly-CCC,0;tRNA-Gly-GCC-2-1,GCATTGGTGGTTCAGTGGTAGAATTCTCGCCTGCCACGCGGGAGGCCCGGGTTCGATTCCCGGCCAATGCACCA,Gly-GCC,0;tRNA-Gly-GCC-3-1,GCATTGGTGGTTCAGTGGTAGAATTCTCGCCTGCCACGCGGGAGGCCCGGGTTTGATTCCCGGCCAGTGCACCA,Gly-GCC,0;tRNA-Gly-GCC-5-1,GCATTGGTGGTTCAGTGGTAGAATTCTCGCCTGCCATGCGGGCGGCCGGGCTTCGATTCCTGGCCAATGCACCA,G…	1.23719	2.3574	0.20533	0.369757	19.0746	17.8374	143334	183768	187466	434744	342942	195263	394132	45192
tRF-+1:T14-Ser-GCT-4	TTTCTGGAGGTTTT	tRF-1	-	-	14	pre_tRNA-Ser-GCT-4-1,TGTGCGGAGGAAGAAAATGACTTTGCCACGCTTAGCATGTGACGAGGTGGCCGAGTGGTTAAGGCGATGGACTGCTAATCCATTGTGCTCTGCACGCGTGGGTTCGAATCCCATCCTCGTCGTTTCTGGAGGTTTTTATTTAACCCTCTGAAAGGATGGGTC,Ser-GCT,122	1.23752	2.35793	0.235349	0.401425	2.87266	1.63514	22.3824	2.69245	1.56332	0	0.304709	5.89244	1.43433	20.9269
tRF-1:31-Glu-TTC-1	TCCCATATGGTCTAGCGGTTAGGATTCCTGG	tRF-5c	-	tRF-31-86V8WPMN1E8Y0	31	tRNA-Glu-TTC-1-1,TCCCATATGGTCTAGCGGTTAGGATTCCTGGTTTTCACCCAGGTGGCCCGGGTTCGACTCCCGGTATGGGAACCA,Glu-TTC,0	1.25725	2.39039	0.190447	0.347104	8.71867	7.46142	88.2129	164.239	181.345	305.133	223.656	218.61	302.439	24.5144
tRF-1:15-Glu-CTC-1-M4	TCCCTGGTGGTCTAG	tRF-5a	-	-	15	tRNA-Glu-CTC-1-1,TCCCTGGTGGTCTAGTGGTTAGGATTCGGCGCTCTCACCGCCGCGGCCCGGGTTCGATTCCCGGTCAGGGAACCA,Glu-CTC,0;tRNA-Glu-CTC-2-1,TCCCTGGTGGTCTAGTGGTTAGGATTCGGCGCTCTCACCGCCGCGGCCCGGGTTCGATTCCCGGTCAGGAAACCA,Glu-CTC,0;tRNA-Glu-TTC-3-1,TCCCTGGTGGTCTAGTGGCTAGGATTCGGCGCTTTCACCGCCGCGGCCCGGGTTCGATTCCCGGCCAGGGAACCA,Glu-TTC,0;tRNA-Glu-TTC-4-1,TCCCTGGTGGTCTAGTGGCTAGGATTCGGCGCTTTCACCGCCGCGGCCCGGGTTCGATTCCCGGTCAGGGAAC…	1.26012	2.39515	0.16945	0.323252	3.95965	2.69953	19.7492	13.4622	7.8166	3.892	2.43767	17.9719	1.02452	43.0497
tRF-1:30-His-GTG-1	GCCGTGATCGTATAGTGGTTAGTACTCTGC	tRF-5c	-	tRF-30-PW5SVP9N15WV	30	tRNA-His-GTG-1-1,GCCGTGATCGTATAGTGGTTAGTACTCTGCGTTGTGGCCGCAGCAACCTCGGTTCGAATCCGAGTCACGGCACCA,His-GTG,0	1.28306	2.43355	0.165409	0.320851	7.97334	6.69028	198.808	48.4641	89.1093	165.021	240.72	192.094	109.624	19.1332
tRF-1:32-Gly-TCC-3	GCGTTGGTGGTATAGTGGTAAGCATAGCTGCC	tRF-5c	-	-	32	tRNA-Gly-TCC-3-1,GCGTTGGTGGTATAGTGGTAAGCATAGCTGCCTTCCAAGCAGTTGACCCGGGTTCGATTCCCGGCCAACGCACCA,Gly-TCC,0	1.28891	2.44343	0.135347	0.281922	5.43487	4.14597	77.68	13.4622	14.0699	15.568	44.4875	47.4342	8.19617	24.5144
tRF-1:14-Val-CAC-2	GCTTCTGTAGTGTA	tRF-5a	-	-	14	tRNA-Val-CAC-2-1,GCTTCTGTAGTGTAGTGGTTATCACGTTCGCCTCACACGCGAAAGGTCCCCGGTTCGAAACCGGGCAGAAGCACCA,Val-CAC,0	1.29231	2.44921	0.179462	0.336585	5.76795	4.47563	15.7993	29.6169	18.7598	36.5848	1.52354	39.1847	17.6218	136.324
tRF-1:23-Val-CAC-2	GCTTCTGTAGTGTAGTGGTTATC	tRF-5b	5009b	tRF-23-Q99P9P9NDD	23	tRNA-Val-CAC-2-1,GCTTCTGTAGTGTAGTGGTTATCACGTTCGCCTCACACGCGAAAGGTCCCCGGTTCGAAACCGGGCAGAAGCACCA,Val-CAC,0	1.29462	2.45313	0.149694	0.296762	4.5067	3.21208	10.5329	16.1547	12.5066	10.8976	3.65651	52.1481	5.73732	14.9478
tRF-1:32-Gly-GCC-4	GCATAGGTGGTTCAGTGGTAGAATTCTTGCCT	tRF-5c	-	-	32	tRNA-Gly-GCC-4-1,GCATAGGTGGTTCAGTGGTAGAATTCTTGCCTGCCACGCAGGAGGCCCAGGTTTGATTCCTGGCCCATGCACCA,Gly-GCC,0	1.29858	2.45986	0.183689	0.343089	8.6816	7.38303	97.4292	123.853	128.192	316.031	231.883	121.09	312.274	29.2977
tRF-1:29-Gly-TCC-2	GCGTTGGTGGTATAGTGGTGAGCATAGCT	tRF-5c	-	tRF-29-QNR8VP94FQEW	29	tRNA-Gly-TCC-2-1,GCGTTGGTGGTATAGTGGTGAGCATAGCTGCCTTCCAAGCAGTTGACCCGGGTTCGATTCCCGGCCAACGCACCA,Gly-TCC,0	1.304	2.46913	0.144834	0.292315	6.00507	4.70107	113.229	24.232	6.25328	28.8008	22.8532	127.571	14.958	46.6371
tRF-1:15-Val-CAC-2	GCTTCTGTAGTGTAG	tRF-5a	5009a	-	15	tRNA-Val-CAC-2-1,GCTTCTGTAGTGTAGTGGTTATCACGTTCGCCTCACACGCGAAAGGTCCCCGGTTCGAAACCGGGCAGAAGCACCA,Val-CAC,0	1.31403	2.48635	0.188954	0.346051	4.97714	3.66311	23.699	18.8471	15.6332	14.0112	0	32.4084	3.48337	96.8617
tiRNA-1:34-Lys-CTT-5	GCCCGGCTAGCTCAGTCGATAGAGCATGAGACTC	tiRNA-5	-	-	34	tRNA-Lys-CTT-5-1,GCCCGGCTAGCTCAGTCGATAGAGCATGAGACTCTTAATCTCAGGGTCGTGGGTTCGAGCCGCACGTTGGGCGCCA,Lys-CTT,0	1.32579	2.50671	0.170217	0.323252	3.98319	2.6574	5.26644	29.6169	3.12664	4.6704	5.18005	3.53546	4.7128	40.658
tRF-1:31-Glu-TTC-2	TCCCACATGGTCTAGCGGTTAGGATTCCTGG	tRF-5c	5028c	tRF-31-86J8WPMN1E8Y0	31	tRNA-Glu-TTC-2-1,TCCCACATGGTCTAGCGGTTAGGATTCCTGGTTTTCACCCAGGCGGCCCGGGTTCGACTCCCGGTGTGGGAACCA,Glu-TTC,0	1.33439	2.52169	0.156616	0.308925	10.0314	8.69697	255.422	401.175	716.001	566.675	418.67	504.982	822.895	85.5014
tRF-1:30-Glu-CTC-1-M2	TCCCTGGTGGTCTAGTGGTTAGGATTCGGC	tRF-5c	-	tRF-30-87R8WP9N1EWJ	30	tRNA-Glu-CTC-1-1,TCCCTGGTGGTCTAGTGGTTAGGATTCGGCGCTCTCACCGCCGCGGCCCGGGTTCGATTCCCGGTCAGGGAACCA,Glu-CTC,0;tRNA-Glu-CTC-2-1,TCCCTGGTGGTCTAGTGGTTAGGATTCGGCGCTCTCACCGCCGCGGCCCGGGTTCGATTCCCGGTCAGGAAACCA,Glu-CTC,0	1.34285	2.53652	0.114065	0.254202	11.5991	10.2562	2585.82	1136.21	1780.62	1377.77	1789.86	4782.01	1056.69	1091.79
tRF-1:30-Gly-TCC-1	GCGTTGGTGGTATAGTGGTTAGCATAGCTG	tRF-5c	-	tRF-30-QNR8VP9NFQFY	30	tRNA-Gly-TCC-1-1,GCGTTGGTGGTATAGTGGTTAGCATAGCTGCCTTCCAAGCAGTTGACCCGGGTTCGATTCCCGGCCAACGCACCA,Gly-TCC,0	1.37933	2.60147	0.145511	0.292315	5.92192	4.5426	64.5139	26.9245	7.8166	32.6928	19.8061	78.6641	36.268	4.18538
tRF-59:75-Pro-AGG-1-M7	TCCCGGACGAGCCCCCA	tRF-3a	-	tRF-17-8SOUPR2	17	tRNA-Pro-AGG-1-1,GGCTCGTTGGTCTAGGGGTATGATTCTCGCTTAGGATGCGAGAGGTCCCGGGTTCAAATCCCGGACGAGCCCCCA,Pro-AGG,58;tRNA-Pro-AGG-2-1,GGCTCGTTGGTCTAGGGGTATGATTCTCGCTTAGGGTGCGAGAGGTCCCGGGTTCAAATCCCGGACGAGCCCCCA,Pro-AGG,58;tRNA-Pro-CGG-1-1,GGCTCGTTGGTCTAGGGGTATGATTCTCGCTTCGGGTGCGAGAGGTCCCGGGTTCAAATCCCGGACGAGCCCCCA,Pro-CGG,58;tRNA-Pro-CGG-2-1,GGCTCGTTGGTCTAGGGGTATGATTCTCGCTTCGGGTGTGAGAGGTCCCGGGTTCAAATCCCGGACGAGC…	1.38885	2.6187	0.100982	0.236496	7.28331	5.89445	242.256	94.2357	85.9826	24.9088	112.438	282.248	11.4746	132.736
tRF-1:31-His-GTG-1	GCCGTGATCGTATAGTGGTTAGTACTCTGCG	tRF-5c	-	tRF-31-PW5SVP9N15WV0	31	tRNA-His-GTG-1-1,GCCGTGATCGTATAGTGGTTAGTACTCTGCGTTGTGGCCGCAGCAACCTCGGTTCGAATCCGAGTCACGGCACCA,His-GTG,0	1.39433	2.62867	0.123671	0.263676	10.37	8.97564	930.844	304.247	681.608	677.208	1270.03	1265.11	504.064	107.026
tRF-1:30-Glu-TTC-2	TCCCACATGGTCTAGCGGTTAGGATTCCTG	tRF-5c	-	tRF-30-86J8WPMN1E8Y	30	tRNA-Glu-TTC-2-1,TCCCACATGGTCTAGCGGTTAGGATTCCTGGTTTTCACCCAGGCGGCCCGGGTTCGACTCCCGGTGTGGGAACCA,Glu-TTC,0	1.39739	2.63425	0.129147	0.270429	7.51629	6.1189	81.6299	48.4641	98.4892	101.192	91.4126	111.367	127.86	18.5353
tRF-1:16-Ser-CGA-1-M3	GCTGTGATGGCCGAGT	tRF-5a	-	-	16	tRNA-Ser-CGA-1-1,GCTGTGATGGCCGAGTGGTTAAGGCGTTGGACTCGAAATCCAATGGGGTCTCCCCGCGCAGGTTCGAATCCTGCTCACAGCGCCA,Ser-CGA,0;tRNA-Ser-CGA-2-1,GCTGTGATGGCCGAGTGGTTAAGGCGTTGGACTCGAAATCCAATGGGGTCTCCCCGCGCAGGTTCAAATCCTGCTCACAGCGCCA,Ser-CGA,0;tRNA-Ser-CGA-3-1,GCTGTGATGGCCGAGTGGTTAAGGTGTTGGACTCGAAATCCAATGGGGGTTCCCCGCGCAGGTTCAAATCCTGCTCACAGCGCCA,Ser-CGA,0	1.40159	2.64193	0.161467	0.315944	3.61483	2.21324	26.3322	5.3849	0	3.1136	0.609418	23.5698	1.43433	22.7207
tRF-1:16-Lys-TTT-3-M2	GCCCGGATAGCTCAGT	tRF-5a	-	-	16	tRNA-Lys-TTT-3-1,GCCCGGATAGCTCAGTCGGTAGAGCATCAGACTTTTAATCTGAGGGTCCAGGGTTCAAGTCCCTGTTCGGGCGCCA,Lys-TTT,0;tRNA-Lys-TTT-5-1,GCCCGGATAGCTCAGTCGGTAGAGCATCAGACTTTTAATCTGAGGGTCCGGGGTTCAAGTCCCTGTTCGGGCGCCA,Lys-TTT,0	1.42003	2.67591	0.100079	0.235602	3.79983	2.3798	18.4325	8.07735	6.25328	3.1136	5.48476	21.2128	3.07356	16.7415
tRF-1:30-Glu-TTC-1	TCCCATATGGTCTAGCGGTTAGGATTCCTG	tRF-5c	-	tRF-30-86V8WPMN1E8Y	30	tRNA-Glu-TTC-1-1,TCCCATATGGTCTAGCGGTTAGGATTCCTGGTTTTCACCCAGGTGGCCCGGGTTCGACTCCCGGTATGGGAACCA,Glu-TTC,0	1.4216	2.67883	0.140697	0.286464	6.21311	4.79151	18.4325	26.9245	26.5765	47.4824	48.7534	47.1395	45.8985	5.97912
tRF-1:31-Glu-TTC-3-M2	TCCCTGGTGGTCTAGTGGCTAGGATTCGGCG	tRF-5c	-	-	31	tRNA-Glu-TTC-3-1,TCCCTGGTGGTCTAGTGGCTAGGATTCGGCGCTTTCACCGCCGCGGCCCGGGTTCGATTCCCGGCCAGGGAACCA,Glu-TTC,0;tRNA-Glu-TTC-4-1,TCCCTGGTGGTCTAGTGGCTAGGATTCGGCGCTTTCACCGCCGCGGCCCGGGTTCGATTCCCGGTCAGGGAACCA,Glu-TTC,0	1.42348	2.68232	0.102146	0.237989	5.35003	3.92655	65.8305	26.9245	17.1965	6.2272	20.4155	77.7802	11.6795	11.9582
tRF-1:32-Glu-CTC-1-M2	TCCCTGGTGGTCTAGTGGTTAGGATTCGGCGC	tRF-5c	-	tRF-32-87R8WP9N1EWJM	32	tRNA-Glu-CTC-1-1,TCCCTGGTGGTCTAGTGGTTAGGATTCGGCGCTCTCACCGCCGCGGCCCGGGTTCGATTCCCGGTCAGGGAACCA,Glu-CTC,0;tRNA-Glu-CTC-2-1,TCCCTGGTGGTCTAGTGGTTAGGATTCGGCGCTCTCACCGCCGCGGCCCGGGTTCGATTCCCGGTCAGGAAACCA,Glu-CTC,0	1.43889	2.71112	0.0974537	0.231238	14.1743	12.7354	20314	10139.8	5327.8	7126.25	9095.56	22424	9214.95	4588.97
tiRNA-1:34-Val-AAC-2	GTTTCCGTAGTGTAGTGGTCATCACGTTCGCCTA	tiRNA-5	-	-	34	tRNA-Val-AAC-2-1,GTTTCCGTAGTGTAGTGGTCATCACGTTCGCCTAACACGCGAAAGGTCCCCGGTTCGAAACCGGGCGGAAACACCA,Val-AAC,0	1.4408	2.71471	0.0966678	0.231238	4.66367	3.22287	30.282	21.5396	12.5066	3.892	13.1025	29.4622	12.2943	7.77286
tRF-1:31-Ala-CGC-3	GGGGATGTAGCTCAGTGGTAGAGCGCGCGCT	tRF-5c	-	-	31	tRNA-Ala-CGC-3-1,GGGGATGTAGCTCAGTGGTAGAGCGCGCGCTTCGCATGTGTGAGGTCCCGGGTTCAATCCCCGGCATCTCCACCA,Ala-CGC,0	1.46476	2.76018	0.148301	0.295295	4.45721	2.99245	2.63322	29.6169	18.7598	2.3352	12.1884	32.1138	9.8354	0.597912
tRF-1:31-Gly-GCC-1	GCATGGGTGGTTCAGTGGTAGAATTCTCGCC	tRF-5c	5003c	tRF-31-P4R8YP9LON4VD	31	tRNA-Gly-GCC-1-1,GCATGGGTGGTTCAGTGGTAGAATTCTCGCCTGCCACGCGGGAGGCCCGGGTTCGATTCCCGGCCCATGCACCA,Gly-GCC,0	1.46961	2.76946	0.114184	0.254202	14.1827	12.7131	7222.93	8220.05	8953.14	9062.14	4986.86	11727.7	14891.6	2203.9
tRF-1:32-Pro-TGG-2	GGCTCGTTGGTCTAGGGGTATGATTCTCGGTT	tRF-5c	-	tRF-32-6978WPRLXN48Q	32	tRNA-Pro-TGG-2-1,GGCTCGTTGGTCTAGGGGTATGATTCTCGGTTTGGGTCCGAGAGGTCCCGGGTTCAAATCCCGGACGAGCCCCCA,Pro-TGG,0	1.47453	2.77892	0.0973591	0.231238	4.86842	3.3939	27.6488	16.1547	6.25328	12.4544	24.072	13.5526	14.958	11.3603
tiRNA-1:34-Lys-CTT-2	GCCCGGCTAGCTCAGTCGGTAGAGCATGAGACTC	tiRNA-5	-	tRF-34-PSQP4PW3FJI0E5	34	tRNA-Lys-CTT-2-1,GCCCGGCTAGCTCAGTCGGTAGAGCATGAGACTCTTAATCTCAGGGTCGTGGGTTCGAGCCCCACGTTGGGCGCCA,Lys-CTT,0	1.51934	2.86659	0.0798922	0.197329	13.3427	11.8234	4363.25	10877.5	5246.5	2508.01	3918.55	3774.11	2031.01	28469
tRF-1:16-chrM.Val-TAC	CAGAGTGTAGCTTAAC	tRF-5a	-	tRF-16-J09PNOD	16	chrM.tRNA2-ValTAC,CAGAGTGTAGCTTAACACAAAGCACCCAACTTACACTTAGGAGATTTCAACTTAACTTGACCGCTCTGACCA,Val-TAC,0	1.54325	2.91451	0.137608	0.284013	6.11518	4.57193	55.2976	26.9245	15.6332	32.6928	3.04709	8.24942	72.9459	8.96868
tRF-1:32-Pro-AGG-1-M5	GGCTCGTTGGTCTAGGGGTATGATTCTCGCTT	tRF-5c	-	tRF-32-6978WPRLXN4VQ	32	tRNA-Pro-AGG-1-1,GGCTCGTTGGTCTAGGGGTATGATTCTCGCTTAGGATGCGAGAGGTCCCGGGTTCAAATCCCGGACGAGCCCCCA,Pro-AGG,0;tRNA-Pro-AGG-2-1,GGCTCGTTGGTCTAGGGGTATGATTCTCGCTTAGGGTGCGAGAGGTCCCGGGTTCAAATCCCGGACGAGCCCCCA,Pro-AGG,0;tRNA-Pro-CGG-1-1,GGCTCGTTGGTCTAGGGGTATGATTCTCGCTTCGGGTGCGAGAGGTCCCGGGTTCAAATCCCGGACGAGCCCCCA,Pro-CGG,0;tRNA-Pro-CGG-2-1,GGCTCGTTGGTCTAGGGGTATGATTCTCGCTTCGGGTGTGAGAGGTCCCGGGTTCAAATCCCGGACGAGCCCC…	1.55761	2.94366	0.0721319	0.183166	9.58933	8.03172	1116.49	242.32	171.965	250.645	671.273	353.546	362.271	359.345
tRF-1:31-Val-CAC-3	GTTTCCGTAGTGTAGCGGTTATCACATTCGC	tRF-5c	-	tRF-31-79MP9PMNH5ISD	31	tRNA-Val-CAC-3-1,GTTTCCGTAGTGTAGCGGTTATCACATTCGCCTCACACGCGAAAGGTCCCCGGTTCGATCCCGGGCGGAAACACCA,Val-CAC,0	1.57859	2.98677	0.0747836	0.186846	4.39488	2.8163	42.1315	5.3849	7.8166	1.5568	7.61772	35.9439	8.19617	7.77286
tRF-1:24-Ser-AGA-1-M7	GTAGTCGTGGCCGAGTGGTTAAGG	tRF-5b	-	tRF-24-S3M8309N0Y	24	tRNA-Ser-AGA-1-1,GTAGTCGTGGCCGAGTGGTTAAGGCGATGGACTAGAAATCCATTGGGGTTTCCCCGCGCAGGTTCGAATCCTGCCGACTACGCCA,Ser-AGA,0;tRNA-Ser-AGA-2-1,GTAGTCGTGGCCGAGTGGTTAAGGCGATGGACTAGAAATCCATTGGGGTCTCCCCGCGCAGGTTCGAATCCTGCCGACTACGCCA,Ser-AGA,0;tRNA-Ser-AGA-3-1,GTAGTCGTGGCCGAGTGGTTAAGGCGATGGACTAGAAATCCATTGGGGTTTCCCCACGCAGGTTCGAATCCTGCCGACTACGCCA,Ser-AGA,0;tRNA-Ser-AGA-4-1,GTAGTCGTGGCCGAGTGGTTAAGGTGATGGACTAGAAACCCAT…	1.59682	3.02475	0.120597	0.262066	3.84196	2.24514	9.21627	2.69245	4.68996	7.0056	16.4543	24.7483	1.02452	0.597912
tRF-1:28-Glu-TTC-1	TCCCATATGGTCTAGCGGTTAGGATTCC	tRF-5c	-	tRF-28-86V8WPMN1E0J	28	tRNA-Glu-TTC-1-1,TCCCATATGGTCTAGCGGTTAGGATTCCTGGTTTTCACCCAGGTGGCCCGGGTTCGACTCCCGGTATGGGAACCA,Glu-TTC,0	1.61952	3.07273	0.0866033	0.211593	5.50317	3.88365	30.282	10.7698	9.37992	23.352	30.4709	31.8192	26.6375	4.7833
tRF-1:30-Gly-TCC-2	GCGTTGGTGGTATAGTGGTGAGCATAGCTG	tRF-5c	5008c	tRF-30-QNR8VP94FQFY	30	tRNA-Gly-TCC-2-1,GCGTTGGTGGTATAGTGGTGAGCATAGCTGCCTTCCAAGCAGTTGACCCGGGTTCGATTCCCGGCCAACGCACCA,Gly-TCC,0	1.64166	3.12025	0.0803778	0.19745	6.52161	4.87994	179.059	21.5396	4.68996	22.5736	35.3462	197.691	27.0474	20.329
tRF-+1:T14-Ala-TGC-1	AACGGTGACTTTTT	tRF-1	-	-	14	pre_tRNA-Ala-TGC-1-1,ACCTCCTGGAAATTATTACAAGAAGGATTTTTTTCAGGAAGGGGGTGTAGCTCAGTGGTAGAGCGCATGCTTTGCATGTATGAGGTCCCGGGTTCGATCCCCGGCACCTCCAAACGGTGACTTTTTGCTCTGGTAGTGCTCAAACCTAATTC,Ala-TGC,112	1.65198	3.14265	0.236827	0.401673	3.79117	2.13919	23.699	0	10.9432	0	0.609418	3.24084	0	60.3891
tRF-1:28-Glu-TTC-2	TCCCACATGGTCTAGCGGTTAGGATTCC	tRF-5c	-	tRF-28-86J8WPMN1E0J	28	tRNA-Glu-TTC-2-1,TCCCACATGGTCTAGCGGTTAGGATTCCTGGTTTTCACCCAGGCGGCCCGGGTTCGACTCCCGGTGTGGGAACCA,Glu-TTC,0	1.65827	3.15639	0.0633246	0.165844	7.35632	5.69804	60.5641	51.1565	68.7861	73.1696	109.695	142.597	86.0598	28.1019
tRF-1:30-Gly-GCC-1	GCATGGGTGGTTCAGTGGTAGAATTCTCGC	tRF-5c	-	tRF-30-P4R8YP9LON4V	30	tRNA-Gly-GCC-1-1,GCATGGGTGGTTCAGTGGTAGAATTCTCGCCTGCCACGCGGGAGGCCCGGGTTCGATTCCCGGCCCATGCACCA,Gly-GCC,0	1.66639	3.17419	0.0731756	0.184779	12.3661	10.6997	5820.74	872.354	2329.35	1554.47	1506.78	4249.92	3960.59	485.505
tRF-1:32-Ala-CGC-3	GGGGATGTAGCTCAGTGGTAGAGCGCGCGCTT	tRF-5c	-	tRF-32-R29P4P9L5HLVQ	32	tRNA-Ala-CGC-3-1,GGGGATGTAGCTCAGTGGTAGAGCGCGCGCTTCGCATGTGTGAGGTCCCGGGTTCAATCCCCGGCATCTCCACCA,Ala-CGC,0	1.6814	3.20738	0.0607926	0.163436	5.56763	3.88624	18.4325	18.8471	40.6463	9.3408	43.2686	50.3804	16.1874	10.1645
tiRNA-1:34-Val-CAC-2	GCTTCTGTAGTGTAGTGGTTATCACGTTCGCCTC	tiRNA-5	-	tRF-34-Q99P9P9NH57S15	34	tRNA-Val-CAC-2-1,GCTTCTGTAGTGTAGTGGTTATCACGTTCGCCTCACACGCGAAAGGTCCCCGGTTCGAAACCGGGCAGAAGCACCA,Val-CAC,0	1.68962	3.22573	0.074821	0.186846	9.85399	8.16437	175.109	888.508	247.005	311.36	26.8144	430.737	244.246	2820.95
tRF-1:32-Ala-AGC-4-M6	GGGGATGTAGCTCAGTGGTAGAGCGCATGCTT	tRF-5c	-	tRF-32-R29P4P9L5HJVQ	32	tRNA-Ala-AGC-4-1,GGGGATGTAGCTCAGTGGTAGAGCGCATGCTTAGCATGCATGAGGTCCCGGGTTCGATCCCCAGCATCTCCACCA,Ala-AGC,0;tRNA-Ala-CGC-1-1,GGGGATGTAGCTCAGTGGTAGAGCGCATGCTTCGCATGTATGAGGTCCCGGGTTCGATCCCCGGCATCTCCACCA,Ala-CGC,0;tRNA-Ala-CGC-2-1,GGGGATGTAGCTCAGTGGTAGAGCGCATGCTTCGCATGTATGAGGCCCCGGGTTCGATCCCCGGCATCTCCACCA,Ala-CGC,0;tRNA-Ala-TGC-2-1,GGGGATGTAGCTCAGTGGTAGAGCGCATGCTTTGCATGTATGAGGTCCCGGGTTCGATCCCCGGCATCTCCAC…	1.71369	3.27999	0.094202	0.227697	4.98589	3.27219	17.1159	2.69245	0	20.2384	7.31301	30.6407	20.9002	12.5562
tRF-1:15-Gly-CCC-3	GCATTGGTGGTTCAA	tRF-5a	-	-	15	tRNA-Gly-CCC-3-1,GCATTGGTGGTTCAATGGTAGAATTCTCGCCTCCCACGCAGGAGACCCAGGTTCGATTCCTGGCCAATGCACCA,Gly-CCC,0	1.73115	3.31993	0.103234	0.238477	3.44361	1.71246	13.1661	8.07735	0	2.3352	1.82825	17.6773	0.204904	25.7102
tRF-1:30-iMet-CAT-1-M2	AGCAGAGTGGCGCAGCGGAAGCGTGCTGGG	tRF-5c	-	tRF-30-FP18LPMBQ4NK	30	tRNA-iMet-CAT-1-1,AGCAGAGTGGCGCAGCGGAAGCGTGCTGGGCCCATAACCCAGAGGTCGATGGATCGAAACCATCCTCTGCTACCA,iMet-CAT,0;tRNA-iMet-CAT-2-1,AGCAGAGTGGCGCAGCGGAAGCGTGCTGGGCCCATAACCCAGAGGTCGATGGATCTAAACCATCCTCTGCTACCA,iMet-CAT,0	1.75647	3.37871	0.052625	0.148666	4.83468	3.07821	47.398	8.07735	4.68996	4.6704	5.18005	73.9501	6.35203	11.3603
tRF-1:23-Glu-CTC-1-M2	TCCCTGGTGGTCTAGTGGTTAGG	tRF-5b	5030b	tRF-23-87R8WP9NY	23	tRNA-Glu-CTC-1-1,TCCCTGGTGGTCTAGTGGTTAGGATTCGGCGCTCTCACCGCCGCGGCCCGGGTTCGATTCCCGGTCAGGGAACCA,Glu-CTC,0;tRNA-Glu-CTC-2-1,TCCCTGGTGGTCTAGTGGTTAGGATTCGGCGCTCTCACCGCCGCGGCCCGGGTTCGATTCCCGGTCAGGAAACCA,Glu-CTC,0	1.78087	3.43634	0.0649529	0.167764	4.47819	2.69732	5.26644	18.8471	4.68996	7.784	30.4709	25.6321	1.84414	5.38121
tRF-1:31-Glu-CTC-1-M2	TCCCTGGTGGTCTAGTGGTTAGGATTCGGCG	tRF-5c	5030c	tRF-31-87R8WP9N1EWJ0	31	tRNA-Glu-CTC-1-1,TCCCTGGTGGTCTAGTGGTTAGGATTCGGCGCTCTCACCGCCGCGGCCCGGGTTCGATTCCCGGTCAGGGAACCA,Glu-CTC,0;tRNA-Glu-CTC-2-1,TCCCTGGTGGTCTAGTGGTTAGGATTCGGCGCTCTCACCGCCGCGGCCCGGGTTCGATTCCCGGTCAGGAAACCA,Glu-CTC,0	1.83127	3.5585	0.0349916	0.11461	12.5384	10.7071	4273.72	3134.01	2579.48	1120.9	3769.86	10675.9	1673.04	1128.26
tiRNA-1:33-Gly-CCC-3	GCATTGGTGGTTCAATGGTAGAATTCTCGCCTC	tiRNA-5	-	-	33	tRNA-Gly-CCC-3-1,GCATTGGTGGTTCAATGGTAGAATTCTCGCCTCCCACGCAGGAGACCCAGGTTCGATTCCTGGCCAATGCACCA,Gly-CCC,0	1.86908	3.65299	0.0422205	0.128944	5.11414	3.24506	28.9654	8.07735	28.1398	1.5568	25.5955	14.1419	20.0806	11.9582
tRF-1:23-Gly-TCC-2-M2	GCGTTGGTGGTATAGTGGTGAGC	tRF-5b	5008b	tRF-23-QNR8VP949	23	tRNA-Gly-TCC-2-1,GCGTTGGTGGTATAGTGGTGAGCATAGCTGCCTTCCAAGCAGTTGACCCGGGTTCGATTCCCGGCCAACGCACCA,Gly-TCC,0;tRNA-Gly-TCC-4-1,GCGTTGGTGGTATAGTGGTGAGCATAGTTGCCTTCCAAGCAGTTGACCCGGGCTCGATTCCCGCCCAACGCACCA,Gly-TCC,0	1.95062	3.86539	0.0499817	0.142986	3.92741	1.97679	14.4827	2.69245	0	5.4488	1.82825	15.9096	3.27847	35.8747
tRF-1:24-Ala-AGC-4-M7	GGGGATGTAGCTCAGTGGTAGAGC	tRF-5b	-	tRF-24-R29P4P9LH9	24	tRNA-Ala-AGC-4-1,GGGGATGTAGCTCAGTGGTAGAGCGCATGCTTAGCATGCATGAGGTCCCGGGTTCGATCCCCAGCATCTCCACCA,Ala-AGC,0;tRNA-Ala-CGC-1-1,GGGGATGTAGCTCAGTGGTAGAGCGCATGCTTCGCATGTATGAGGTCCCGGGTTCGATCCCCGGCATCTCCACCA,Ala-CGC,0;tRNA-Ala-CGC-2-1,GGGGATGTAGCTCAGTGGTAGAGCGCATGCTTCGCATGTATGAGGCCCCGGGTTCGATCCCCGGCATCTCCACCA,Ala-CGC,0;tRNA-Ala-CGC-3-1,GGGGATGTAGCTCAGTGGTAGAGCGCGCGCTTCGCATGTGTGAGGTCCCGGGTTCAATCCCCGGCATCTCCAC…	1.9597	3.88981	0.0357368	0.114996	4.66424	2.70453	17.1159	13.4622	6.25328	5.4488	31.0803	36.2385	2.04904	5.38121
tiRNA-1:33-Gly-CCC-1	GCATTGGTGGTTCAGTGGTAGAATTCTCGCCTC	tiRNA-5	-	tRF-33-PNR8YP9LON4VD5	33	tRNA-Gly-CCC-1-1,GCATTGGTGGTTCAGTGGTAGAATTCTCGCCTCCCACGCGGGAGACCCGGGTTCAATTCCCGGCCAATGCACCA,Gly-CCC,0	1.96912	3.91529	0.0254051	0.0940834	14.0908	12.1217	11766.5	3575.57	11296.6	2369.45	11569.2	8977.13	9556.73	8798.87
tRF-1:29-Pro-AGG-1-M6	GGCTCGTTGGTCTAGGGGTATGATTCTCG	tRF-5c	-	tRF-29-6978WPRLXNHK	29	tRNA-Pro-AGG-1-1,GGCTCGTTGGTCTAGGGGTATGATTCTCGCTTAGGATGCGAGAGGTCCCGGGTTCAAATCCCGGACGAGCCCCCA,Pro-AGG,0;tRNA-Pro-AGG-2-1,GGCTCGTTGGTCTAGGGGTATGATTCTCGCTTAGGGTGCGAGAGGTCCCGGGTTCAAATCCCGGACGAGCCCCCA,Pro-AGG,0;tRNA-Pro-CGG-1-1,GGCTCGTTGGTCTAGGGGTATGATTCTCGCTTCGGGTGCGAGAGGTCCCGGGTTCAAATCCCGGACGAGCCCCCA,Pro-CGG,0;tRNA-Pro-CGG-2-1,GGCTCGTTGGTCTAGGGGTATGATTCTCGCTTCGGGTGTGAGAGGTCCCGGGTTCAAATCCCGGACGAGCCCC…	2.02874	4.08048	0.029958	0.104162	4.78634	2.7576	15.7993	5.3849	18.7598	3.1136	37.1745	16.4988	7.37655	4.7833
tiRNA-1:33-Gly-GCC-4	GCATAGGTGGTTCAGTGGTAGAATTCTTGCCTG	tiRNA-5	-	-	33	tRNA-Gly-GCC-4-1,GCATAGGTGGTTCAGTGGTAGAATTCTTGCCTGCCACGCAGGAGGCCCAGGTTTGATTCCTGGCCCATGCACCA,Gly-GCC,0	2.0298	4.08347	0.0267227	0.0973065	6.41954	4.38974	47.398	35.0018	50.0263	8.5624	65.2077	31.2299	51.8408	20.329
tiRNA-1:33-Gly-GCC-2-M3	GCATTGGTGGTTCAGTGGTAGAATTCTCGCCTG	tiRNA-5	-	tRF-33-PNR8YP9LON4VDP	33	tRNA-Gly-GCC-2-1,GCATTGGTGGTTCAGTGGTAGAATTCTCGCCTGCCACGCGGGAGGCCCGGGTTCGATTCCCGGCCAATGCACCA,Gly-GCC,0;tRNA-Gly-GCC-3-1,GCATTGGTGGTTCAGTGGTAGAATTCTCGCCTGCCACGCGGGAGGCCCGGGTTTGATTCCCGGCCAGTGCACCA,Gly-GCC,0;tRNA-Gly-GCC-5-1,GCATTGGTGGTTCAGTGGTAGAATTCTCGCCTGCCATGCGGGCGGCCGGGCTTCGATTCCTGGCCAATGCACCA,Gly-GCC,0	2.06473	4.18356	0.022602	0.089615	16.7676	14.7029	65005	36019.6	68002.9	10647	92584.5	39726.5	62274.1	33850.2
tRF-59:76-Val-CAC-2	AACCGGGCAGAAGCACCA	tRF-3a	-	tRF-18-BS6PDFD2	18	tRNA-Val-CAC-2-1,GCTTCTGTAGTGTAGTGGTTATCACGTTCGCCTCACACGCGAAAGGTCCCCGGTTCGAAACCGGGCAGAAGCACCA,Val-CAC,58	2.06715	4.19057	0.0550691	0.152545	3.5508	1.48365	3.94983	8.07735	1.56332	3.1136	0.304709	15.9096	1.43433	29.8956
tRF-1:22-Gly-CCC-1-M4	GCATTGGTGGTTCAGTGGTAGA	tRF-5b	5004b	tRF-22-PNR8YP9LL	22	tRNA-Gly-CCC-1-1,GCATTGGTGGTTCAGTGGTAGAATTCTCGCCTCCCACGCGGGAGACCCGGGTTCAATTCCCGGCCAATGCACCA,Gly-CCC,0;tRNA-Gly-GCC-2-1,GCATTGGTGGTTCAGTGGTAGAATTCTCGCCTGCCACGCGGGAGGCCCGGGTTCGATTCCCGGCCAATGCACCA,Gly-GCC,0;tRNA-Gly-GCC-3-1,GCATTGGTGGTTCAGTGGTAGAATTCTCGCCTGCCACGCGGGAGGCCCGGGTTTGATTCCCGGCCAGTGCACCA,Gly-GCC,0;tRNA-Gly-GCC-5-1,GCATTGGTGGTTCAGTGGTAGAATTCTCGCCTGCCATGCGGGCGGCCGGGCTTCGATTCCTGGCCAATGCACCA,G…	2.11206	4.32307	0.0234178	0.0904687	6.76643	4.65437	67.1471	13.4622	6.25328	42.0336	100.554	149.668	13.5237	80.1202
tRF-1:22-Ala-AGC-4-M7	GGGGATGTAGCTCAGTGGTAGA	tRF-5b	-	tRF-22-R29P4P9LL	22	tRNA-Ala-AGC-4-1,GGGGATGTAGCTCAGTGGTAGAGCGCATGCTTAGCATGCATGAGGTCCCGGGTTCGATCCCCAGCATCTCCACCA,Ala-AGC,0;tRNA-Ala-CGC-1-1,GGGGATGTAGCTCAGTGGTAGAGCGCATGCTTCGCATGTATGAGGTCCCGGGTTCGATCCCCGGCATCTCCACCA,Ala-CGC,0;tRNA-Ala-CGC-2-1,GGGGATGTAGCTCAGTGGTAGAGCGCATGCTTCGCATGTATGAGGCCCCGGGTTCGATCCCCGGCATCTCCACCA,Ala-CGC,0;tRNA-Ala-CGC-3-1,GGGGATGTAGCTCAGTGGTAGAGCGCGCGCTTCGCATGTGTGAGGTCCCGGGTTCAATCCCCGGCATCTCCAC…	2.14891	4.43492	0.0465592	0.136654	3.67205	1.52315	2.63322	5.3849	6.25328	2.3352	12.4931	25.3375	0.819617	1.19582
tiRNA-1:34-Gly-TCC-1	GCGTTGGTGGTATAGTGGTTAGCATAGCTGCCTT	tiRNA-5	-	-	34	tRNA-Gly-TCC-1-1,GCGTTGGTGGTATAGTGGTTAGCATAGCTGCCTTCCAAGCAGTTGACCCGGGTTCGATTCCCGGCCAACGCACCA,Gly-TCC,0	2.15244	4.44579	0.0173509	0.0794651	7.48236	5.32991	121.128	21.5396	56.2795	42.0336	176.122	103.412	80.7323	31.0914
tiRNA-1:34-Lys-CTT-3	GCCCGGCTAGCTCAGTCGGTAGAGCATGAGACCC	tiRNA-5	-	tRF-34-PSQP4PW3FJI0EJ	34	tRNA-Lys-CTT-3-1,GCCCGGCTAGCTCAGTCGGTAGAGCATGAGACCCTTAATCTCAGGGTCGTGGGTTCGAGCCCCACGTTGGGCGCCA,Lys-CTT,0	2.21515	4.64328	0.0127904	0.0656963	9.83668	7.62153	127.711	376.943	243.878	252.202	167.285	733.609	284.407	1959.96
tRF-1:28-Gly-TCC-1	GCGTTGGTGGTATAGTGGTTAGCATAGC	tRF-5c	-	tRF-28-QNR8VP9NFQ9	28	tRNA-Gly-TCC-1-1,GCGTTGGTGGTATAGTGGTTAGCATAGCTGCCTTCCAAGCAGTTGACCCGGGTTCGATTCCCGGCCAACGCACCA,Gly-TCC,0	2.22705	4.68177	0.0199438	0.0842484	5.20561	2.97855	39.4983	2.69245	3.12664	7.784	25.5955	63.0491	10.8599	3.58747
tRF-1:16-Val-CAC-2	GCTTCTGTAGTGTAGT	tRF-5a	-	-	16	tRNA-Val-CAC-2-1,GCTTCTGTAGTGTAGTGGTTATCACGTTCGCCTCACACGCGAAAGGTCCCCGGTTCGAAACCGGGCAGAAGCACCA,Val-CAC,0	2.25184	4.76289	0.0472049	0.137655	3.65583	1.40399	2.63322	5.3849	0	4.6704	0.304709	20.6235	0.819617	31.0914
tiRNA-1:34-His-GTG-1	GCCGTGATCGTATAGTGGTTAGTACTCTGCGTTG	tiRNA-5	-	tRF-34-PW5SVP9N15WV2P	34	tRNA-His-GTG-1-1,GCCGTGATCGTATAGTGGTTAGTACTCTGCGTTGTGGCCGCAGCAACCTCGGTTCGAATCCGAGTCACGGCACCA,His-GTG,0	2.25226	4.76429	0.0204627	0.0856401	9.67428	7.42202	172.476	53.849	301.721	250.645	710.581	501.447	427.225	56.8016
tRF-1:32-Gly-GCC-1	GCATGGGTGGTTCAGTGGTAGAATTCTCGCCT	tRF-5c	-	tRF-32-P4R8YP9LON4V3	32	tRNA-Gly-GCC-1-1,GCATGGGTGGTTCAGTGGTAGAATTCTCGCCTGCCACGCGGGAGGCCCGGGTTCGATTCCCGGCCCATGCACCA,Gly-GCC,0	2.26134	4.79436	0.0334462	0.111159	17.3982	15.1368	12518.3	18809.5	9239.23	81463.5	49858	82720.2	144955	15990
tRF-1:29-Gly-CCC-1-M4	GCATTGGTGGTTCAGTGGTAGAATTCTCG	tRF-5c	-	tRF-29-PNR8YP9LONHK	29	tRNA-Gly-CCC-1-1,GCATTGGTGGTTCAGTGGTAGAATTCTCGCCTCCCACGCGGGAGACCCGGGTTCAATTCCCGGCCAATGCACCA,Gly-CCC,0;tRNA-Gly-GCC-2-1,GCATTGGTGGTTCAGTGGTAGAATTCTCGCCTGCCACGCGGGAGGCCCGGGTTCGATTCCCGGCCAATGCACCA,Gly-GCC,0;tRNA-Gly-GCC-3-1,GCATTGGTGGTTCAGTGGTAGAATTCTCGCCTGCCACGCGGGAGGCCCGGGTTTGATTCCCGGCCAGTGCACCA,Gly-GCC,0;tRNA-Gly-GCC-5-1,GCATTGGTGGTTCAGTGGTAGAATTCTCGCCTGCCATGCGGGCGGCCGGGCTTCGATTCCTGGCCAATGCACCA,G…	2.27908	4.85369	0.0141998	0.070531	12.7252	10.4461	3346.82	802.35	3128.2	1118.56	5152.32	9770.85	2327.92	518.39
tRF-58:75-Ala-AGC-1	TCCCCAGTACCTCCACCA	tRF-3a	3019a	tRF-18-8R1546D2	18	tRNA-Ala-AGC-1-1,GGGGGTATAGCTCAGTGGTAGAGCGCGTGCTTAGCATGCACGAGGTCCTGGGTTCGATCCCCAGTACCTCCACCA,Ala-AGC,57	2.38659	5.22918	0.0237964	0.0911419	4.29584	1.90925	31.5987	0	0	0.7784	1.21884	47.7288	1.63923	27.504
tRF-1:22-Gly-GCC-1	GCATGGGTGGTTCAGTGGTAGA	tRF-5b	5003b	tRF-22-P4R8YP9LL	22	tRNA-Gly-GCC-1-1,GCATGGGTGGTTCAGTGGTAGAATTCTCGCCTGCCACGCGGGAGGCCCGGGTTCGATTCCCGGCCCATGCACCA,Gly-GCC,0	2.3939	5.25575	0.00750741	0.0435045	4.69449	2.3006	18.4325	5.3849	3.12664	4.6704	21.0249	39.1847	4.9177	13.1541
tRF-1:28-Val-AAC-1-M7	GTTTCCGTAGTGTAGTGGTTATCACGTT	tRF-5c	-	tRF-28-79MP9P9NH50E	28	tRNA-Val-AAC-1-1,GTTTCCGTAGTGTAGTGGTTATCACGTTCGCCTAACACGCGAAAGGTCCCCGGTTCGAAACCGGGCGGAAACACCA,Val-AAC,0;tRNA-Val-AAC-3-1,GTTTCCGTAGTGTAGTGGTTATCACGTTCGCCTAACACGCGAAAGGTCCCTGGATCAAAACCAGGCGGAAACACCA,Val-AAC,0;tRNA-Val-AAC-4-1,GTTTCCGTAGTGTAGTGGTTATCACGTTCGCCTAACACGCGAAAGGTCCGCGGTTCGAAACCGGGCGGAAACACCA,Val-AAC,0;tRNA-Val-AAC-5-1,GTTTCCGTAGTGTAGTGGTTATCACGTTTGCCTAACACGCGAAAGGTCCCCGGTTCGAAACCGGGCAGAA…	2.39913	5.27485	0.0136519	0.0685629	4.86155	2.46242	23.699	8.07735	0	5.4488	29.8615	44.7826	4.50789	5.38121
tRF-1:29-Val-AAC-1-M6	GTTTCCGTAGTGTAGTGGTTATCACGTTC	tRF-5c	-	tRF-29-79MP9P9NH525	29	tRNA-Val-AAC-1-1,GTTTCCGTAGTGTAGTGGTTATCACGTTCGCCTAACACGCGAAAGGTCCCCGGTTCGAAACCGGGCGGAAACACCA,Val-AAC,0;tRNA-Val-AAC-3-1,GTTTCCGTAGTGTAGTGGTTATCACGTTCGCCTAACACGCGAAAGGTCCCTGGATCAAAACCAGGCGGAAACACCA,Val-AAC,0;tRNA-Val-AAC-4-1,GTTTCCGTAGTGTAGTGGTTATCACGTTCGCCTAACACGCGAAAGGTCCGCGGTTCGAAACCGGGCGGAAACACCA,Val-AAC,0;tRNA-Val-CAC-1-1,GTTTCCGTAGTGTAGTGGTTATCACGTTCGCCTCACACGCGAAAGGTCCCCGGTTCGAAACCGGGCGGAA…	2.46923	5.53748	0.00793718	0.0435869	6.95849	4.48926	64.5139	43.0792	21.8865	18.6816	113.047	86.6189	59.4222	10.1645
tRF-60:76-Val-CAC-2	ACCGGGCAGAAGCACCA	tRF-3a	-	tRF-17-08P2F52	17	tRNA-Val-CAC-2-1,GCTTCTGTAGTGTAGTGGTTATCACGTTCGCCTCACACGCGAAAGGTCCCCGGTTCGAAACCGGGCAGAAGCACCA,Val-CAC,59	2.48491	5.59798	0.0147506	0.0724704	4.95422	2.46932	26.3322	16.1547	3.12664	0.7784	0.914126	50.0857	1.63923	79.5223
tiRNA-1:34-Glu-TTC-1	TCCCATATGGTCTAGCGGTTAGGATTCCTGGTTT	tiRNA-5	-	tRF-34-86V8WPMN1E8Y2Q	34	tRNA-Glu-TTC-1-1,TCCCATATGGTCTAGCGGTTAGGATTCCTGGTTTTCACCCAGGTGGCCCGGGTTCGACTCCCGGTATGGGAACCA,Glu-TTC,0	2.50683	5.68371	0.0124312	0.0645851	12.1315	9.62472	500.312	1381.23	892.656	1094.43	1694.18	1969.25	3680.28	163.828
tRF-1:30-Val-CAC-3	GTTTCCGTAGTGTAGCGGTTATCACATTCG	tRF-5c	-	tRF-30-79MP9PMNH5IS	30	tRNA-Val-CAC-3-1,GTTTCCGTAGTGTAGCGGTTATCACATTCGCCTCACACGCGAAAGGTCCCCGGTTCGATCCCGGGCGGAAACACCA,Val-CAC,0	2.52176	5.74283	0.0109808	0.058392	4.10485	1.58309	21.0658	0	0	1.5568	10.0554	18.8558	8.19617	4.7833
tRF-1:28-Gly-GCC-4	GCATAGGTGGTTCAGTGGTAGAATTCTT	tRF-5c	-	-	28	tRNA-Gly-GCC-4-1,GCATAGGTGGTTCAGTGGTAGAATTCTTGCCTGCCACGCAGGAGGCCCAGGTTTGATTCCTGGCCCATGCACCA,Gly-GCC,0	2.54813	5.84876	0.00800379	0.0435869	9.06446	6.51633	190.909	16.1547	162.585	112.09	435.429	599.261	215.149	55.0079
tiRNA-1:34-Gly-TCC-2	GCGTTGGTGGTATAGTGGTGAGCATAGCTGCCTT	tiRNA-5	-	-	34	tRNA-Gly-TCC-2-1,GCGTTGGTGGTATAGTGGTGAGCATAGCTGCCTTCCAAGCAGTTGACCCGGGTTCGATTCCCGGCCAACGCACCA,Gly-TCC,0	2.63484	6.21107	0.0032144	0.0234681	8.62675	5.99191	308.087	37.6943	62.5328	48.2608	293.13	620.179	92.6167	168.611
tRF-1:28-Gly-CCC-1-M4	GCATTGGTGGTTCAGTGGTAGAATTCTC	tRF-5c	-	tRF-28-PNR8YP9LOND5	28	tRNA-Gly-CCC-1-1,GCATTGGTGGTTCAGTGGTAGAATTCTCGCCTCCCACGCGGGAGACCCGGGTTCAATTCCCGGCCAATGCACCA,Gly-CCC,0;tRNA-Gly-GCC-2-1,GCATTGGTGGTTCAGTGGTAGAATTCTCGCCTGCCACGCGGGAGGCCCGGGTTCGATTCCCGGCCAATGCACCA,Gly-GCC,0;tRNA-Gly-GCC-3-1,GCATTGGTGGTTCAGTGGTAGAATTCTCGCCTGCCACGCGGGAGGCCCGGGTTTGATTCCCGGCCAGTGCACCA,Gly-GCC,0;tRNA-Gly-GCC-5-1,GCATTGGTGGTTCAGTGGTAGAATTCTCGCCTGCCATGCGGGCGGCCGGGCTTCGATTCCTGGCCAATGCACCA,G…	2.67958	6.40668	0.00551376	0.0346142	12.95	10.2704	2580.56	697.344	2654.52	1144.25	8747.28	7698.47	2476.68	371.901
tRF-1:29-Val-AAC-5	GTTTCCGTAGTGTAGTGGTTATCACGTTT	tRF-5c	-	-	29	tRNA-Val-AAC-5-1,GTTTCCGTAGTGTAGTGGTTATCACGTTTGCCTAACACGCGAAAGGTCCCCGGTTCGAAACCGGGCAGAAACACCA,Val-AAC,0	2.72036	6.59038	0.00378295	0.0264144	4.82228	2.10192	15.7993	0	6.25328	3.892	19.5014	26.2214	12.7041	10.7624
tiRNA-1:36-SeC-TCA-1	GCCCGGATGATCCTCAGTGGTCTGGGGTGCAGGCTT	tiRNA-5	-	-	36	tRNA-SeC-TCA-1-1,GCCCGGATGATCCTCAGTGGTCTGGGGTGCAGGCTTCAAACCTGTAGCTGTCTAGCGACAGAGTGGTTCAATTCCACCTTTCGGGCGCCA,SeC-TCA,0	2.7732	6.83624	0.00293005	0.0220731	7.13545	4.36224	21.0658	18.8471	18.7598	34.2496	140.166	109.01	47.7427	54.41
tiRNA-1:34-Glu-TTC-2	TCCCACATGGTCTAGCGGTTAGGATTCCTGGTTT	tiRNA-5	-	tRF-34-86J8WPMN1E8Y2Q	34	tRNA-Glu-TTC-2-1,TCCCACATGGTCTAGCGGTTAGGATTCCTGGTTTTCACCCAGGCGGCCCGGGTTCGACTCCCGGTGTGGGAACCA,Glu-TTC,0	2.79467	6.9387	0.00605391	0.0369779	13.3108	10.5162	947.96	3174.4	2188.65	1579.37	3118.39	4672.12	8640.4	314.502
tRF-1:32-Lys-TTT-3-M2	GCCCGGATAGCTCAGTCGGTAGAGCATCAGAC	tRF-5c	-	tRF-32-PS5P4PW3FJHP1	32	tRNA-Lys-TTT-3-1,GCCCGGATAGCTCAGTCGGTAGAGCATCAGACTTTTAATCTGAGGGTCCAGGGTTCAAGTCCCTGTTCGGGCGCCA,Lys-TTT,0;tRNA-Lys-TTT-5-1,GCCCGGATAGCTCAGTCGGTAGAGCATCAGACTTTTAATCTGAGGGTCCGGGGTTCAAGTCCCTGTTCGGGCGCCA,Lys-TTT,0	2.80757	7.00106	0.00245192	0.0205234	11.9565	9.1489	654.355	815.812	544.036	815.764	2398.97	6088.95	1492.52	644.549
tRF-1:29-Gly-GCC-1	GCATGGGTGGTTCAGTGGTAGAATTCTCG	tRF-5c	-	tRF-29-P4R8YP9LONHK	29	tRNA-Gly-GCC-1-1,GCATGGGTGGTTCAGTGGTAGAATTCTCGCCTGCCACGCGGGAGGCCCGGGTTCGATTCCCGGCCCATGCACCA,Gly-GCC,0	2.84703	7.19516	0.00321907	0.0234681	10.2932	7.44615	372.601	75.3886	250.131	224.958	560.664	1533.51	703.231	87.8931
tRF-1:24-Glu-CTC-1-M2	TCCCTGGTGGTCTAGTGGTTAGGA	tRF-5b	-	tRF-24-87R8WP9NEX	24	tRNA-Glu-CTC-1-1,TCCCTGGTGGTCTAGTGGTTAGGATTCGGCGCTCTCACCGCCGCGGCCCGGGTTCGATTCCCGGTCAGGGAACCA,Glu-CTC,0;tRNA-Glu-CTC-2-1,TCCCTGGTGGTCTAGTGGTTAGGATTCGGCGCTCTCACCGCCGCGGCCCGGGTTCGATTCCCGGTCAGGAAACCA,Glu-CTC,0	2.90136	7.47129	0.00596962	0.0369626	5.12653	2.22517	15.7993	8.07735	0	5.4488	54.8476	37.417	1.43433	3.58747
tRF-1:30-Lys-TTT-3-M2	GCCCGGATAGCTCAGTCGGTAGAGCATCAG	tRF-5c	-	tRF-30-PS5P4PW3FJHP	30	tRNA-Lys-TTT-3-1,GCCCGGATAGCTCAGTCGGTAGAGCATCAGACTTTTAATCTGAGGGTCCAGGGTTCAAGTCCCTGTTCGGGCGCCA,Lys-TTT,0;tRNA-Lys-TTT-5-1,GCCCGGATAGCTCAGTCGGTAGAGCATCAGACTTTTAATCTGAGGGTCCGGGGTTCAAGTCCCTGTTCGGGCGCCA,Lys-TTT,0	2.90912	7.51157	0.0035707	0.0256183	7.99613	5.08702	42.1315	8.07735	123.502	18.6816	305.928	337.637	39.9563	26.3081
tRF-1:28-Lys-TTT-3-M2	GCCCGGATAGCTCAGTCGGTAGAGCATC	tRF-5c	-	tRF-28-PS5P4PW3FJDD	28	tRNA-Lys-TTT-3-1,GCCCGGATAGCTCAGTCGGTAGAGCATCAGACTTTTAATCTGAGGGTCCAGGGTTCAAGTCCCTGTTCGGGCGCCA,Lys-TTT,0;tRNA-Lys-TTT-5-1,GCCCGGATAGCTCAGTCGGTAGAGCATCAGACTTTTAATCTGAGGGTCCGGGGTTCAAGTCCCTGTTCGGGCGCCA,Lys-TTT,0	2.9115	7.524	0.00256645	0.0210916	6.65736	3.74586	13.1661	21.5396	12.5066	19.46	123.102	111.956	18.4414	19.7311
tRF-1:16-chrM.Phe-GAA	GTTTATGTAGCTTACC	tRF-5a	-	tRF-16-7X9PN5D	16	chrM.tRNA1-PheGAA,GTTTATGTAGCTTACCTCCTCAAAGCAATACACTGAAAATGTTTAGACGGGCTCACATCACCCCATAAACACCA,Phe-GAA,0	2.97494	7.86222	0.0325495	0.108981	5.46121	2.48627	15.7993	0	12.5066	4.6704	0.609418	2.94622	48.5623	1.79374
tRF-1:23-Ala-AGC-4-M7	GGGGATGTAGCTCAGTGGTAGAG	tRF-5b	-	tRF-23-R29P4P9LDS	23	tRNA-Ala-AGC-4-1,GGGGATGTAGCTCAGTGGTAGAGCGCATGCTTAGCATGCATGAGGTCCCGGGTTCGATCCCCAGCATCTCCACCA,Ala-AGC,0;tRNA-Ala-CGC-1-1,GGGGATGTAGCTCAGTGGTAGAGCGCATGCTTCGCATGTATGAGGTCCCGGGTTCGATCCCCGGCATCTCCACCA,Ala-CGC,0;tRNA-Ala-CGC-2-1,GGGGATGTAGCTCAGTGGTAGAGCGCATGCTTCGCATGTATGAGGCCCCGGGTTCGATCCCCGGCATCTCCACCA,Ala-CGC,0;tRNA-Ala-CGC-3-1,GGGGATGTAGCTCAGTGGTAGAGCGCGCGCTTCGCATGTGTGAGGTCCCGGGTTCAATCCCCGGCATCTCCAC…	2.97665	7.87158	0.00797206	0.0435869	4.88037	1.90371	5.26644	5.3849	7.8166	3.1136	31.0803	63.3437	0.409808	0
tRF-1:32-Lys-CTT-1-M2	GCCCGGCTAGCTCAGTCGGTAGAGCATGGGAC	tRF-5c	5006c	tRF-32-PSQP4PW3FJIK1	32	tRNA-Lys-CTT-1-1,GCCCGGCTAGCTCAGTCGGTAGAGCATGGGACTCTTAATCCCAGGGTCGTGGGTTCGAGCCCCACGTTGGGCGCCA,Lys-CTT,0;tRNA-Lys-CTT-4-1,GCCCGGCTAGCTCAGTCGGTAGAGCATGGGACTCTTAATCTCAGGGTCGTGGGTTCGAGCCCCACGTTGGGCGCCA,Lys-CTT,0	2.97705	7.87374	0.00157348	0.0143916	10.3099	7.33285	193.542	180.394	71.9128	284.895	694.127	1287.5	652.825	381.468
tRF-1:29-Glu-TTC-3-M2	TCCCTGGTGGTCTAGTGGCTAGGATTCGG	tRF-5c	-	tRF-29-87R8WP9I1EJ4	29	tRNA-Glu-TTC-3-1,TCCCTGGTGGTCTAGTGGCTAGGATTCGGCGCTTTCACCGCCGCGGCCCGGGTTCGATTCCCGGCCAGGGAACCA,Glu-TTC,0;tRNA-Glu-TTC-4-1,TCCCTGGTGGTCTAGTGGCTAGGATTCGGCGCTTTCACCGCCGCGGCCCGGGTTCGATTCCCGGTCAGGGAACCA,Glu-TTC,0	2.98499	7.91717	0.00288543	0.0220731	5.77686	2.79188	40.8149	5.3849	1.56332	4.6704	35.9556	92.8059	18.0316	2.98956
tRF-1:29-Gly-GCC-4	GCATAGGTGGTTCAGTGGTAGAATTCTTG	tRF-5c	-	-	29	tRNA-Gly-GCC-4-1,GCATAGGTGGTTCAGTGGTAGAATTCTTGCCTGCCACGCAGGAGGCCCAGGTTTGATTCCTGGCCCATGCACCA,Gly-GCC,0	2.99161	7.95361	0.00548366	0.0346142	4.49551	1.5039	2.63322	0	6.25328	3.892	13.4072	37.417	8.40107	0.597912
tRF-1:28-His-GTG-1	GCCGTGATCGTATAGTGGTTAGTACTCT	tRF-5c	-	tRF-28-PW5SVP9N1503	28	tRNA-His-GTG-1-1,GCCGTGATCGTATAGTGGTTAGTACTCTGCGTTGTGGCCGCAGCAACCTCGGTTCGAATCCGAGTCACGGCACCA,His-GTG,0	3.02416	8.13508	0.00264753	0.0213693	7.43432	4.41016	47.398	5.3849	18.7598	33.4712	196.537	199.459	42.4152	9.56659
tRF-1:29-iMet-CAT-1-M2	AGCAGAGTGGCGCAGCGGAAGCGTGCTGG	tRF-5c	-	tRF-29-FP18LPMBQ4H4	29	tRNA-iMet-CAT-1-1,AGCAGAGTGGCGCAGCGGAAGCGTGCTGGGCCCATAACCCAGAGGTCGATGGATCGAAACCATCCTCTGCTACCA,iMet-CAT,0;tRNA-iMet-CAT-2-1,AGCAGAGTGGCGCAGCGGAAGCGTGCTGGGCCCATAACCCAGAGGTCGATGGATCTAAACCATCCTCTGCTACCA,iMet-CAT,0	3.05817	8.32915	0.00915221	0.0492476	3.32635	0.268183	2.63322	0	0	2.3352	1.82825	22.3913	3.68828	1.79374
tiRNA-1:34-Asp-GTC-2	TCCTCGTTAGTATAGTGGTGAGTATCCCCGCCTG	tiRNA-5	-	tRF-34-897PVP941QKS1P	34	tRNA-Asp-GTC-2-1,TCCTCGTTAGTATAGTGGTGAGTATCCCCGCCTGTCACGCGGGAGACCGGGGTTCGATTCCCCGACGGGGAGCCA,Asp-GTC,0	3.12202	8.70604	0.00188299	0.0166885	7.21246	4.09044	26.3322	16.1547	39.083	14.7896	120.055	73.6555	88.1088	4.7833
tRF-1:28-Gly-GCC-1	GCATGGGTGGTTCAGTGGTAGAATTCTC	tRF-5c	-	tRF-28-P4R8YP9LOND5	28	tRNA-Gly-GCC-1-1,GCATGGGTGGTTCAGTGGTAGAATTCTCGCCTGCCACGCGGGAGGCCCGGGTTCGATTCCCGGCCCATGCACCA,Gly-GCC,0	3.2031	9.20937	0.00159199	0.0143916	10.3391	7.13599	157.993	72.6961	165.712	230.406	727.34	1221.5	763.678	49.6267
tiRNA-1:34-Gly-TCC-3	GCGTTGGTGGTATAGTGGTAAGCATAGCTGCCTT	tiRNA-5	-	-	34	tRNA-Gly-TCC-3-1,GCGTTGGTGGTATAGTGGTAAGCATAGCTGCCTTCCAAGCAGTTGACCCGGGTTCGATTCCCGGCCAACGCACCA,Gly-TCC,0	3.23042	9.38541	0.000913586	0.00917647	5.79733	2.56691	42.1315	2.69245	4.68996	0.7784	62.4653	57.7459	10.8599	23.3186
tRF-28:41-Phe-GAA-1-M4	TAGACTGAAGATCT	tRF-2	-	-	14	tRNA-Phe-GAA-1-1,GCCGAAATAGCTCAGTTGGGAGAGCGTTAGACTGAAGATCTAAAGGTCCCTGGTTCGATCCCGGGTTTCGGCACCA,Phe-GAA,27;tRNA-Phe-GAA-2-1,GCCGAAATAGCTCAGTTGGGAGAGCGTTAGACTGAAGATCTAAAGGTCCCTGGTTCAATCCCGGGTTTCGGCACCA,Phe-GAA,27;tRNA-Phe-GAA-3-1,GCCGAGATAGCTCAGTTGGGAGAGCGTTAGACTGAAGATCTAAAGGTCCCTGGTTCAATCCCGGGTTTCGGCACCA,Phe-GAA,27;tRNA-Phe-GAA-6-1,GCTGAAATAGCTCAGTTGGGAGAGCGTTAGACTGAAGATCTTAAAGTTCCCTGGTTCAACCCTGGGT…	3.33876	10.1173	0.0239953	0.0911419	2.58592	-0.752836	0	2.69245	1.56332	0	0.304709	5.00857	0	21.5248
tRF-1:31-Lys-TTT-3-M2	GCCCGGATAGCTCAGTCGGTAGAGCATCAGA	tRF-5c	5005c	tRF-31-PS5P4PW3FJHPB	31	tRNA-Lys-TTT-3-1,GCCCGGATAGCTCAGTCGGTAGAGCATCAGACTTTTAATCTGAGGGTCCAGGGTTCAAGTCCCTGTTCGGGCGCCA,Lys-TTT,0;tRNA-Lys-TTT-5-1,GCCCGGATAGCTCAGTCGGTAGAGCATCAGACTTTTAATCTGAGGGTCCGGGGTTCAAGTCCCTGTTCGGGCGCCA,Lys-TTT,0	3.36596	10.3099	0.000308491	0.00435743	9.39227	6.02631	114.545	70.0037	131.319	59.1584	576.509	1008.79	173.144	114.201
tRF-1:32-Val-CAC-2	GCTTCTGTAGTGTAGTGGTTATCACGTTCGCC	tRF-5c	-	tRF-32-Q99P9P9NH57SJ	32	tRNA-Val-CAC-2-1,GCTTCTGTAGTGTAGTGGTTATCACGTTCGCCTCACACGCGAAAGGTCCCCGGTTCGAAACCGGGCAGAAGCACCA,Val-CAC,0	3.37446	10.3708	0.000536224	0.00591154	11.5974	8.22299	321.253	807.735	261.075	325.371	124.016	6327.01	1196.64	2103.45
tiRNA-1:34-Lys-TTT-3-M2	GCCCGGATAGCTCAGTCGGTAGAGCATCAGACTT	tiRNA-5	-	tRF-34-PS5P4PW3FJHPEQ	34	tRNA-Lys-TTT-3-1,GCCCGGATAGCTCAGTCGGTAGAGCATCAGACTTTTAATCTGAGGGTCCAGGGTTCAAGTCCCTGTTCGGGCGCCA,Lys-TTT,0;tRNA-Lys-TTT-5-1,GCCCGGATAGCTCAGTCGGTAGAGCATCAGACTTTTAATCTGAGGGTCCGGGGTTCAAGTCCCTGTTCGGGCGCCA,Lys-TTT,0	3.51675	11.4458	0.000281263	0.004101	12.2127	8.69599	435.798	543.875	695.678	484.165	3140.02	3069.67	2853.5	617.045
tRF-1:28-Gly-TCC-4	GCGTTGGTGGTATAGTGGTGAGCATAGT	tRF-5c	-	-	28	tRNA-Gly-TCC-4-1,GCGTTGGTGGTATAGTGGTGAGCATAGTTGCCTTCCAAGCAGTTGACCCGGGCTCGATTCCCGCCCAACGCACCA,Gly-TCC,0	3.54493	11.6716	0.00049969	0.00589354	5.47446	1.92953	18.4325	2.69245	0	3.892	18.2825	105.769	8.19617	15.5457
tRF-1:32-Lys-CTT-5	GCCCGGCTAGCTCAGTCGATAGAGCATGAGAC	tRF-5c	-	-	32	tRNA-Lys-CTT-5-1,GCCCGGCTAGCTCAGTCGATAGAGCATGAGACTCTTAATCTCAGGGTCGTGGGTTCGAGCCGCACGTTGGGCGCCA,Lys-CTT,0	3.58803	12.0255	0.000344321	0.00457745	5.17339	1.58537	3.94983	0	3.12664	5.4488	28.0332	40.0686	11.4746	19.1332
tRF-1:29-His-GTG-1	GCCGTGATCGTATAGTGGTTAGTACTCTG	tRF-5c	-	tRF-29-PW5SVP9N15JP	29	tRNA-His-GTG-1-1,GCCGTGATCGTATAGTGGTTAGTACTCTGCGTTGTGGCCGCAGCAACCTCGGTTCGAATCCGAGTCACGGCACCA,His-GTG,0	3.5934	12.0704	0.000521553	0.00589354	7.08922	3.49583	27.6488	8.07735	7.8166	16.3464	154.183	168.818	31.1454	4.18538
tRF-1:29-Glu-CTC-1-M2	TCCCTGGTGGTCTAGTGGTTAGGATTCGG	tRF-5c	-	tRF-29-87R8WP9N1EJ4	29	tRNA-Glu-CTC-1-1,TCCCTGGTGGTCTAGTGGTTAGGATTCGGCGCTCTCACCGCCGCGGCCCGGGTTCGATTCCCGGTCAGGGAACCA,Glu-CTC,0;tRNA-Glu-CTC-2-1,TCCCTGGTGGTCTAGTGGTTAGGATTCGGCGCTCTCACCGCCGCGGCCCGGGTTCGATTCCCGGTCAGGAAACCA,Glu-CTC,0	3.65551	12.6014	0.00021443	0.00345817	13.0504	9.39491	1706.33	514.258	584.682	907.615	7064.98	12269.2	2607.61	661.889
tRF-1:29-Lys-TTT-3-M2	GCCCGGATAGCTCAGTCGGTAGAGCATCA	tRF-5c	-	tRF-29-PS5P4PW3FJF2	29	tRNA-Lys-TTT-3-1,GCCCGGATAGCTCAGTCGGTAGAGCATCAGACTTTTAATCTGAGGGTCCAGGGTTCAAGTCCCTGTTCGGGCGCCA,Lys-TTT,0;tRNA-Lys-TTT-5-1,GCCCGGATAGCTCAGTCGGTAGAGCATCAGACTTTTAATCTGAGGGTCCGGGGTTCAAGTCCCTGTTCGGGCGCCA,Lys-TTT,0	3.65552	12.6015	0.000725782	0.00745576	5.86696	2.21144	5.26644	2.69245	1.56332	9.3408	60.9418	81.9049	12.7041	3.58747
tRF-1:30-Thr-TGT-4-M2	GGCTCCATAGCTCAGGGGTTAGAGCACTGG	tRF-5c	-	-	30	tRNA-Thr-TGT-4-1,GGCTCCATAGCTCAGGGGTTAGAGCACTGGTCTTGTAAACCAGGGGTCGCGAGTTCAAATCTCGCTGGGGCCTCCA,Thr-TGT,0;tRNA-Thr-TGT-6-1,GGCTCCATAGCTCAGGGGTTAGAGCACTGGTCTTGTAAACCAGGGTCGCGAGTTCAAATCTCGCTGGGGCCTCCA,Thr-TGT,0	3.66662	12.6988	0.000650562	0.00696228	4.56958	0.90296	3.94983	0	6.25328	0.7784	22.5485	36.8278	5.12261	1.79374
tRF-1:28-Gly-TCC-2	GCGTTGGTGGTATAGTGGTGAGCATAGC	tRF-5c	-	tRF-28-QNR8VP94FQ9	28	tRNA-Gly-TCC-2-1,GCGTTGGTGGTATAGTGGTGAGCATAGCTGCCTTCCAAGCAGTTGACCCGGGTTCGATTCCCGGCCAACGCACCA,Gly-TCC,0	3.6758	12.7799	0.000503415	0.00589354	5.99388	2.31808	27.6488	0	1.56332	4.6704	43.2686	142.302	9.42559	8.37077
tRF-1:22-Lys-TTT-3-M2	GCCCGGATAGCTCAGTCGGTAG	tRF-5b	-	tRF-22-PS5P4PW3H	22	tRNA-Lys-TTT-3-1,GCCCGGATAGCTCAGTCGGTAGAGCATCAGACTTTTAATCTGAGGGTCCAGGGTTCAAGTCCCTGTTCGGGCGCCA,Lys-TTT,0;tRNA-Lys-TTT-5-1,GCCCGGATAGCTCAGTCGGTAGAGCATCAGACTTTTAATCTGAGGGTCCGGGGTTCAAGTCCCTGTTCGGGCGCCA,Lys-TTT,0	3.7021	13.0149	0.00141102	0.0138648	4.26868	0.566581	2.63322	2.69245	1.56332	1.5568	31.6897	19.4451	0.409808	1.79374
tRF-1:24-Gly-CCC-1-M4	GCATTGGTGGTTCAGTGGTAGAAT	tRF-5b	-	tRF-24-PNR8YP9LH7	24	tRNA-Gly-CCC-1-1,GCATTGGTGGTTCAGTGGTAGAATTCTCGCCTCCCACGCGGGAGACCCGGGTTCAATTCCCGGCCAATGCACCA,Gly-CCC,0;tRNA-Gly-GCC-2-1,GCATTGGTGGTTCAGTGGTAGAATTCTCGCCTGCCACGCGGGAGGCCCGGGTTCGATTCCCGGCCAATGCACCA,Gly-GCC,0;tRNA-Gly-GCC-3-1,GCATTGGTGGTTCAGTGGTAGAATTCTCGCCTGCCACGCGGGAGGCCCGGGTTTGATTCCCGGCCAGTGCACCA,Gly-GCC,0;tRNA-Gly-GCC-5-1,GCATTGGTGGTTCAGTGGTAGAATTCTCGCCTGCCATGCGGGCGGCCGGGCTTCGATTCCTGGCCAATGCACCA,G…	3.77016	13.6437	0.000221874	0.00345817	7.55286	3.78269	44.7648	24.232	6.25328	14.0112	270.277	239.528	7.37655	28.6998
tRF-1:32-Lys-CTT-2-M2	GCCCGGCTAGCTCAGTCGGTAGAGCATGAGAC	tRF-5c	-	tRF-32-PSQP4PW3FJI01	32	tRNA-Lys-CTT-2-1,GCCCGGCTAGCTCAGTCGGTAGAGCATGAGACTCTTAATCTCAGGGTCGTGGGTTCGAGCCCCACGTTGGGCGCCA,Lys-CTT,0;tRNA-Lys-CTT-3-1,GCCCGGCTAGCTCAGTCGGTAGAGCATGAGACCCTTAATCTCAGGGTCGTGGGTTCGAGCCCCACGTTGGGCGCCA,Lys-CTT,0	3.80181	13.9462	6.66822e-05	0.00131045	15.0327	11.2309	3169.08	3764.04	1546.12	3607.11	23984.2	38551.6	12162.3	14442
tRF-1:29-Arg-TCT-1	GGCTCCGTGGCGCAATGGATAGCGCATTG	tRF-5c	-	-	29	tRNA-Arg-TCT-1-1,GGCTCCGTGGCGCAATGGATAGCGCATTGGACTTCTAATTCAAAGGTTCCGGGTTCGAGTCCCGGCGGAGTCGCCA,Arg-TCT,0	3.8541	14.461	0.000662341	0.00696228	3.87789	0.0237894	5.26644	0	0	0.7784	12.7978	29.1676	1.84414	1.19582
tRF-1:23-Gly-CCC-1-M4	GCATTGGTGGTTCAGTGGTAGAA	tRF-5b	-	tRF-23-PNR8YP9LD6	23	tRNA-Gly-CCC-1-1,GCATTGGTGGTTCAGTGGTAGAATTCTCGCCTCCCACGCGGGAGACCCGGGTTCAATTCCCGGCCAATGCACCA,Gly-CCC,0;tRNA-Gly-GCC-2-1,GCATTGGTGGTTCAGTGGTAGAATTCTCGCCTGCCACGCGGGAGGCCCGGGTTCGATTCCCGGCCAATGCACCA,Gly-GCC,0;tRNA-Gly-GCC-3-1,GCATTGGTGGTTCAGTGGTAGAATTCTCGCCTGCCACGCGGGAGGCCCGGGTTTGATTCCCGGCCAGTGCACCA,Gly-GCC,0;tRNA-Gly-GCC-5-1,GCATTGGTGGTTCAGTGGTAGAATTCTCGCCTGCCATGCGGGCGGCCGGGCTTCGATTCCTGGCCAATGCACCA,G…	3.93804	15.3274	0.000204042	0.00341581	5.80969	1.87165	17.1159	5.3849	3.12664	1.5568	82.5761	68.6469	2.04904	8.37077
tRF-1:30-Arg-TCT-1	GGCTCCGTGGCGCAATGGATAGCGCATTGG	tRF-5c	-	-	30	tRNA-Arg-TCT-1-1,GGCTCCGTGGCGCAATGGATAGCGCATTGGACTTCTAATTCAAAGGTTCCGGGTTCGAGTCCCGGCGGAGTCGCCA,Arg-TCT,0	4.08092	16.923	0.000338351	0.00457745	4.10589	0.024975	1.31661	0	3.12664	0.7784	11.2742	33.5869	4.09808	1.79374
tRF-1:23-Lys-TTT-3-M2	GCCCGGATAGCTCAGTCGGTAGA	tRF-5b	-	tRF-23-PS5P4PW3X	23	tRNA-Lys-TTT-3-1,GCCCGGATAGCTCAGTCGGTAGAGCATCAGACTTTTAATCTGAGGGTCCAGGGTTCAAGTCCCTGTTCGGGCGCCA,Lys-TTT,0;tRNA-Lys-TTT-5-1,GCCCGGATAGCTCAGTCGGTAGAGCATCAGACTTTTAATCTGAGGGTCCGGGGTTCAAGTCCCTGTTCGGGCGCCA,Lys-TTT,0	4.08264	16.9432	0.000156403	0.00282776	6.34101	2.25837	9.21627	10.7698	7.8166	3.1136	127.978	84.2619	4.30299	6.57703
tRF-1:24-Gly-GCC-1	GCATGGGTGGTTCAGTGGTAGAAT	tRF-5b	-	tRF-24-P4R8YP9LH7	24	tRNA-Gly-GCC-1-1,GCATGGGTGGTTCAGTGGTAGAATTCTCGCCTGCCACGCGGGAGGCCCGGGTTCGATTCCCGGCCCATGCACCA,Gly-GCC,0	4.12138	17.4044	0.000202756	0.00341581	5.26283	1.14146	6.58305	0	1.56332	3.1136	55.1523	47.4342	1.84414	5.97912
tiRNA-1:33-Gly-GCC-1	GCATGGGTGGTTCAGTGGTAGAATTCTCGCCTG	tiRNA-5	-	tRF-33-P4R8YP9LON4VDP	33	tRNA-Gly-GCC-1-1,GCATGGGTGGTTCAGTGGTAGAATTCTCGCCTGCCACGCGGGAGGCCCGGGTTCGATTCCCGGCCCATGCACCA,Gly-GCC,0	4.24087	18.9073	1.26949e-05	0.000478175	14.8264	10.5855	2595.04	2547.06	2207.41	1549.02	10534.1	22098.1	19254.6	10222.5
tRF-1:31-Lys-CTT-1-M2	GCCCGGCTAGCTCAGTCGGTAGAGCATGGGA	tRF-5c	-	-	31	tRNA-Lys-CTT-1-1,GCCCGGCTAGCTCAGTCGGTAGAGCATGGGACTCTTAATCCCAGGGTCGTGGGTTCGAGCCCCACGTTGGGCGCCA,Lys-CTT,0;tRNA-Lys-CTT-4-1,GCCCGGCTAGCTCAGTCGGTAGAGCATGGGACTCTTAATCTCAGGGTCGTGGGTTCGAGCCCCACGTTGGGCGCCA,Lys-CTT,0	4.30752	19.8013	2.62951e-05	0.000710407	7.9689	3.66137	28.9654	10.7698	3.12664	21.0168	105.429	540.926	68.6429	57.3995
tRF-1:29-Val-CAC-3	GTTTCCGTAGTGTAGCGGTTATCACATTC	tRF-5c	-	tRF-29-79MP9PMNH5F5	29	tRNA-Val-CAC-3-1,GTTTCCGTAGTGTAGCGGTTATCACATTCGCCTCACACGCGAAAGGTCCCCGGTTCGATCCCGGGCGGAAACACCA,Val-CAC,0	4.35882	20.5181	2.90067e-05	0.000710407	6.55504	2.19622	13.1661	2.69245	6.25328	4.6704	92.6315	66.5846	40.3661	10.7624
tRF-1:32-Lys-CTT-7	GCCCAGCTAGCTCAGTCGGTAGAGCATGAGAC	tRF-5c	-	-	32	tRNA-Lys-CTT-7-1,GCCCAGCTAGCTCAGTCGGTAGAGCATGAGACTCTTAATCTCAGGGTCATGGGTTTGAGCCCCACGTTTGGTGCCA,Lys-CTT,0	4.44373	21.7618	8.0565e-06	0.000331049	5.98764	1.54391	7.89966	2.69245	3.12664	3.1136	41.1357	70.12	25.8179	27.504
tRF-1:23-Thr-CGT-2-M2	GGCGCGGTGGCCAAGTGGTAAGG	tRF-5b	-	tRF-23-6VR8K09LY	23	tRNA-Thr-CGT-2-1,GGCGCGGTGGCCAAGTGGTAAGGCGTCGGTCTCGTAAACCGAAGATCACGGGTTCGAACCCCGTCCGTGCCTCCA,Thr-CGT,0;tRNA-Thr-CGT-4-1,GGCGCGGTGGCCAAGTGGTAAGGCGTCGGTCTCGTAAACCGAAGATCGCGGGTTCGAACCCCGTCCGTGCCTCCA,Thr-CGT,0	4.52222	22.9787	0.00157299	0.0143916	3.77901	-0.743209	3.94983	0	0	0	24.072	13.258	0	0
tRF-1:24-Ser-GCT-1-M5	GACGAGGTGGCCGAGTGGTTAAGG	tRF-5b	-	tRF-24-OUR8309N0Y	24	tRNA-Ser-GCT-1-1,GACGAGGTGGCCGAGTGGTTAAGGCGATGGACTGCTAATCCATTGTGCTCTGCACGCGTGGGTTCGAATCCCACCCTCGTCGCCA,Ser-GCT,0;tRNA-Ser-GCT-2-1,GACGAGGTGGCCGAGTGGTTAAGGCGATGGACTGCTAATCCATTGTGCTCTGCACGCGTGGGTTCGAATCCCACCTTCGTCGCCA,Ser-GCT,0;tRNA-Ser-GCT-3-1,GACGAGGTGGCCGAGTGGTTAAGGCGATGGACTGCTAATCCATTGTGCTTTGCACGCGTGGGTTCGAATCCCATCCTCGTCGCCA,Ser-GCT,0;tRNA-Ser-GCT-4-1,GACGAGGTGGCCGAGTGGTTAAGGCGATGGACTGCTAATCCAT…	4.57107	23.77	0.000273629	0.004101	5.05131	0.480238	3.94983	5.3849	0	0.7784	43.2686	56.5674	0	2.39165
tRF-1:28-Glu-TTC-3-M2	TCCCTGGTGGTCTAGTGGCTAGGATTCG	tRF-5c	-	tRF-28-87R8WP9I1E0K	28	tRNA-Glu-TTC-3-1,TCCCTGGTGGTCTAGTGGCTAGGATTCGGCGCTTTCACCGCCGCGGCCCGGGTTCGATTCCCGGCCAGGGAACCA,Glu-TTC,0;tRNA-Glu-TTC-4-1,TCCCTGGTGGTCTAGTGGCTAGGATTCGGCGCTTTCACCGCCGCGGCCCGGGTTCGATTCCCGGTCAGGGAACCA,Glu-TTC,0	4.643	24.9852	1.66237e-05	0.000577992	6.45576	1.81275	15.7993	2.69245	1.56332	3.1136	91.7173	117.849	20.4904	5.97912
tRF-1:28-Lys-CTT-10	GCCCAGCTAGCTCAGTCGGTAGAGCATA	tRF-5c	-	-	28	tRNA-Lys-CTT-10-1,GCCCAGCTAGCTCAGTCGGTAGAGCATAAGACTCTTAATCTCAGGGTTGTGGATTCGTGCCCCATGCTGGGTGCCA,Lys-CTT,0	4.64812	25.0741	1.99634e-05	0.000601563	7.18427	2.53614	13.1661	5.3849	0	10.1192	181.606	188.853	13.9335	40.658
tRF-1:32-Cys-GCA-2-M2	GGGGGTATAGCTCAGTGGTAGAGCATTTGACT	tRF-5c	5016c	tRF-32-RKVP4P9L5FZU3	32	tRNA-Cys-GCA-2-1,GGGGGTATAGCTCAGTGGTAGAGCATTTGACTGCAGATCAAGAGGTCCCCGGTTCAAATCCGGGTGCCCCCTCCA,Cys-GCA,0;tRNA-Cys-GCA-4-1,GGGGGTATAGCTCAGTGGTAGAGCATTTGACTGCAGATCAAGAGGTCCCTGGTTCAAATCCGGGTGCCCCCTCCA,Cys-GCA,0	4.66099	25.2986	3.14339e-05	0.000710407	6.69658	2.0356	7.89966	8.07735	1.56332	5.4488	117.618	31.8192	49.9966	5.97912
tRF-1:31-Val-CAC-2	GCTTCTGTAGTGTAGTGGTTATCACGTTCGC	tRF-5c	5009c	tRF-31-Q99P9P9NH57SD	31	tRNA-Val-CAC-2-1,GCTTCTGTAGTGTAGTGGTTATCACGTTCGCCTCACACGCGAAAGGTCCCCGGTTCGAAACCGGGCAGAAGCACCA,Val-CAC,0	4.67333	25.516	1.83723e-05	0.000593161	7.62706	2.95373	6.58305	10.7698	3.12664	14.0112	8.83655	371.224	93.4363	98.0576
tRF-1:31-Lys-CTT-2-M2	GCCCGGCTAGCTCAGTCGGTAGAGCATGAGA	tRF-5c	-	tRF-31-PSQP4PW3FJI0B	31	tRNA-Lys-CTT-2-1,GCCCGGCTAGCTCAGTCGGTAGAGCATGAGACTCTTAATCTCAGGGTCGTGGGTTCGAGCCCCACGTTGGGCGCCA,Lys-CTT,0;tRNA-Lys-CTT-3-1,GCCCGGCTAGCTCAGTCGGTAGAGCATGAGACCCTTAATCTCAGGGTCGTGGGTTCGAGCCCCACGTTGGGCGCCA,Lys-CTT,0	4.70904	26.1555	1.71008e-06	0.000154591	12.4463	7.73721	505.578	331.171	139.136	263.878	4792.46	8072.64	1355.85	1642.46
tRF-1:29-Val-CAC-2	GCTTCTGTAGTGTAGTGGTTATCACGTTC	tRF-5c	-	tRF-29-Q99P9P9NH525	29	tRNA-Val-CAC-2-1,GCTTCTGTAGTGTAGTGGTTATCACGTTCGCCTCACACGCGAAAGGTCCCCGGTTCGAAACCGGGCAGAAGCACCA,Val-CAC,0	4.73891	26.7027	4.63379e-05	0.000952032	7.57846	2.83954	18.4325	0	0	14.0112	25.5955	236.876	127.246	47.833
tRF-1:30-Lys-CTT-1-M2	GCCCGGCTAGCTCAGTCGGTAGAGCATGGG	tRF-5c	-	tRF-30-PSQP4PW3FJIK	30	tRNA-Lys-CTT-1-1,GCCCGGCTAGCTCAGTCGGTAGAGCATGGGACTCTTAATCCCAGGGTCGTGGGTTCGAGCCCCACGTTGGGCGCCA,Lys-CTT,0;tRNA-Lys-CTT-4-1,GCCCGGCTAGCTCAGTCGGTAGAGCATGGGACTCTTAATCTCAGGGTCGTGGGTTCGAGCCCCACGTTGGGCGCCA,Lys-CTT,0	4.7398	26.7192	7.39006e-06	0.000331049	6.65254	1.91273	5.26644	5.3849	3.12664	5.4488	53.9335	199.165	27.4572	20.329
tRF-1:28-Lys-CTT-1-M4	GCCCGGCTAGCTCAGTCGGTAGAGCATG	tRF-5c	-	tRF-28-PSQP4PW3FJD0	28	tRNA-Lys-CTT-1-1,GCCCGGCTAGCTCAGTCGGTAGAGCATGGGACTCTTAATCCCAGGGTCGTGGGTTCGAGCCCCACGTTGGGCGCCA,Lys-CTT,0;tRNA-Lys-CTT-2-1,GCCCGGCTAGCTCAGTCGGTAGAGCATGAGACTCTTAATCTCAGGGTCGTGGGTTCGAGCCCCACGTTGGGCGCCA,Lys-CTT,0;tRNA-Lys-CTT-3-1,GCCCGGCTAGCTCAGTCGGTAGAGCATGAGACCCTTAATCTCAGGGTCGTGGGTTCGAGCCCCACGTTGGGCGCCA,Lys-CTT,0;tRNA-Lys-CTT-4-1,GCCCGGCTAGCTCAGTCGGTAGAGCATGGGACTCTTAATCTCAGGGTCGTGGGTTCGAGCCCCACGTTGG…	4.78925	27.6508	5.25259e-06	0.00027865	10.5535	5.76422	176.426	86.1584	21.8865	60.7152	2291.41	1458.08	130.524	206.878
tiRNA-1:33-Cys-GCA-2-M2	GGGGGTATAGCTCAGTGGTAGAGCATTTGACTG	tiRNA-5	-	tRF-33-RKVP4P9L5FZUDP	33	tRNA-Cys-GCA-2-1,GGGGGTATAGCTCAGTGGTAGAGCATTTGACTGCAGATCAAGAGGTCCCCGGTTCAAATCCGGGTGCCCCCTCCA,Cys-GCA,0;tRNA-Cys-GCA-4-1,GGGGGTATAGCTCAGTGGTAGAGCATTTGACTGCAGATCAAGAGGTCCCTGGTTCAAATCCGGGTGCCCCCTCCA,Cys-GCA,0	4.80527	27.9596	4.11876e-05	0.000886514	5.44489	0.639616	7.89966	0	1.56332	0.7784	74.9584	8.24942	10.0403	1.79374
tRF-1:28-Val-CAC-3	GTTTCCGTAGTGTAGCGGTTATCACATT	tRF-5c	-	tRF-28-79MP9PMNH5DE	28	tRNA-Val-CAC-3-1,GTTTCCGTAGTGTAGCGGTTATCACATTCGCCTCACACGCGAAAGGTCCCCGGTTCGATCCCGGGCGGAAACACCA,Val-CAC,0	4.95242	30.9618	3.99982e-06	0.000273884	8.20187	3.24945	36.8651	21.5396	3.12664	7.0056	430.858	289.319	37.2926	23.9165
tRF-1:28-Glu-CTC-1-M2	TCCCTGGTGGTCTAGTGGTTAGGATTCG	tRF-5c	-	tRF-28-87R8WP9N1E0K	28	tRNA-Glu-CTC-1-1,TCCCTGGTGGTCTAGTGGTTAGGATTCGGCGCTCTCACCGCCGCGGCCCGGGTTCGATTCCCGGTCAGGGAACCA,Glu-CTC,0;tRNA-Glu-CTC-2-1,TCCCTGGTGGTCTAGTGGTTAGGATTCGGCGCTCTCACCGCCGCGGCCCGGGTTCGATTCCCGGTCAGGAAACCA,Glu-CTC,0	4.97688	31.4913	4.24157e-06	0.000273884	14.0228	9.04588	2246.14	420.022	372.07	519.971	20369.5	21321.8	2823.58	767.121
tRF-1:30-Lys-CTT-2-M2	GCCCGGCTAGCTCAGTCGGTAGAGCATGAG	tRF-5c	-	tRF-30-PSQP4PW3FJI0	30	tRNA-Lys-CTT-2-1,GCCCGGCTAGCTCAGTCGGTAGAGCATGAGACTCTTAATCTCAGGGTCGTGGGTTCGAGCCCCACGTTGGGCGCCA,Lys-CTT,0;tRNA-Lys-CTT-3-1,GCCCGGCTAGCTCAGTCGGTAGAGCATGAGACCCTTAATCTCAGGGTCGTGGGTTCGAGCCCCACGTTGGGCGCCA,Lys-CTT,0	5.00391	32.0868	5.11953e-07	5.78507e-05	10.1655	5.16159	113.229	53.849	25.0131	36.5848	1219.44	1334.64	264.122	302.543
tRF-1:30-Val-CAC-2	GCTTCTGTAGTGTAGTGGTTATCACGTTCG	tRF-5c	-	tRF-30-Q99P9P9NH57S	30	tRNA-Val-CAC-2-1,GCTTCTGTAGTGTAGTGGTTATCACGTTCGCCTCACACGCGAAAGGTCCCCGGTTCGAAACCGGGCAGAAGCACCA,Val-CAC,0	5.17727	36.1838	5.54834e-06	0.00027865	5.93376	0.756489	6.58305	2.69245	1.56332	0.7784	4.26592	124.331	29.5062	13.1541
tRF-1:24-Lys-TTT-3-M2	GCCCGGATAGCTCAGTCGGTAGAG	tRF-5b	-	tRF-24-PS5P4PW3ES	24	tRNA-Lys-TTT-3-1,GCCCGGATAGCTCAGTCGGTAGAGCATCAGACTTTTAATCTGAGGGTCCAGGGTTCAAGTCCCTGTTCGGGCGCCA,Lys-TTT,0;tRNA-Lys-TTT-5-1,GCCCGGATAGCTCAGTCGGTAGAGCATCAGACTTTTAATCTGAGGGTCCGGGGTTCAAGTCCCTGTTCGGGCGCCA,Lys-TTT,0	5.24865	38.019	2.97073e-05	0.000710407	6.50902	1.26037	13.1661	2.69245	1.56332	0.7784	157.839	86.6189	1.84414	0.597912
tRF-1:29-Lys-CTT-2-M2	GCCCGGCTAGCTCAGTCGGTAGAGCATGA	tRF-5c	-	tRF-29-PSQP4PW3FJFL	29	tRNA-Lys-CTT-2-1,GCCCGGCTAGCTCAGTCGGTAGAGCATGAGACTCTTAATCTCAGGGTCGTGGGTTCGAGCCCCACGTTGGGCGCCA,Lys-CTT,0;tRNA-Lys-CTT-3-1,GCCCGGCTAGCTCAGTCGGTAGAGCATGAGACCCTTAATCTCAGGGTCGTGGGTTCGAGCCCCACGTTGGGCGCCA,Lys-CTT,0	5.66222	50.6406	2.96309e-07	4.46439e-05	10.7019	5.03964	160.626	21.5396	6.25328	35.8064	2219.5	1711.75	247.524	343.201
tRF-1:29-Lys-CTT-1-M2	GCCCGGCTAGCTCAGTCGGTAGAGCATGG	tRF-5c	-	tRF-29-PSQP4PW3FJF4	29	tRNA-Lys-CTT-1-1,GCCCGGCTAGCTCAGTCGGTAGAGCATGGGACTCTTAATCCCAGGGTCGTGGGTTCGAGCCCCACGTTGGGCGCCA,Lys-CTT,0;tRNA-Lys-CTT-4-1,GCCCGGCTAGCTCAGTCGGTAGAGCATGGGACTCTTAATCTCAGGGTCGTGGGTTCGAGCCCCACGTTGGGCGCCA,Lys-CTT,0	5.76386	54.3368	1.86215e-07	4.20846e-05	9.97876	4.2149	92.1627	10.7698	6.25328	18.6816	1187.15	1184.38	208.183	114.799
tRF-1:24-Ser-CGA-1-M3	GCTGTGATGGCCGAGTGGTTAAGG	tRF-5b	-	tRF-24-QW58309N0Y	24	tRNA-Ser-CGA-1-1,GCTGTGATGGCCGAGTGGTTAAGGCGTTGGACTCGAAATCCAATGGGGTCTCCCCGCGCAGGTTCGAATCCTGCTCACAGCGCCA,Ser-CGA,0;tRNA-Ser-CGA-2-1,GCTGTGATGGCCGAGTGGTTAAGGCGTTGGACTCGAAATCCAATGGGGTCTCCCCGCGCAGGTTCAAATCCTGCTCACAGCGCCA,Ser-CGA,0;tRNA-Ser-CGA-3-1,GCTGTGATGGCCGAGTGGTTAAGGTGTTGGACTCGAAATCCAATGGGGGTTCCCCGCGCAGGTTCAAATCCTGCTCACAGCGCCA,Ser-CGA,0	5.85728	57.972	9.62489e-05	0.00181269	3.96672	-1.89056	1.31661	0	0	0	24.9861	18.8558	0	0.597912
tRF-1:28-Val-CAC-2	GCTTCTGTAGTGTAGTGGTTATCACGTT	tRF-5c	-	tRF-28-Q99P9P9NH50E	28	tRNA-Val-CAC-2-1,GCTTCTGTAGTGTAGTGGTTATCACGTTCGCCTCACACGCGAAAGGTCCCCGGTTCGAAACCGGGCAGAAGCACCA,Val-CAC,0	6.10077	68.6303	1.30446e-07	4.20846e-05	8.20614	2.10536	15.7993	0	3.12664	5.4488	42.9639	784.873	79.9126	66.9661
